# Supplementary material for: Aminative annulation of cyano-enynyl esters leading to functionalized cyclopentenones
Source: Royal Society of Chemistry journal article supplement (doi:10.1039/d3cc02213g), 2023-01-01

## Aminative Annulation of Cyano-Enynyl Esters Leading to Functionalized Cyclopentenones

Chada Raji Reddy,<sup>a,\*</sup> Veeramalla Ganesh,<sup>a</sup> and Nagender Punna<sup>b</sup>

<sup>a</sup>Department of Organic Synthesis & Process Chemistry, CSIR-Indian Institute of Chemical Technology, Hyderabad-500007, India

<sup>b</sup>Department of Fluoro- & Agro-Chemicals, CSIR-Indian Institute of Chemical Technology, Hyderabad-500007, India

### Table of Contents

|                                                                                  |         |
|----------------------------------------------------------------------------------|---------|
| 1. General information .....                                                     | S1      |
| 2. Structures of starting materials .....                                        | S2      |
| 3. General reaction and characterization data of compounds .....                 | S2-S15  |
| 4. X-ray crystal data and References .....                                       | S16-S17 |
| 5. <sup>1</sup> H NMR and <sup>13</sup> C NMR spectral copies of compounds ..... | S18-S71 |

### 1. General information:

All the reactions were performed in oven-dried glass apparatus, the air and moisture sensitive reactions were carried out under inert atmosphere (nitrogen) using freshly distilled anhydrous solvents. Commercially available reagents were used as such without further purification. All reactions were monitored by thin-layer chromatography carried out on silica plates using UV-light and anisaldehyde for visualization. Column chromatography was performed on silica gel (100-200 mesh) using hexane and ethyl acetate as eluent. <sup>1</sup>H NMR was recorded in CDCl<sub>3</sub> on 500 MHz, 400 MHz and 300 MHz and <sup>13</sup>C NMR was recorded on 125 MHz, 100 MHz and 75 MHz. δ7.26 and δ77 are corresponding to CDCl<sub>3</sub> in <sup>1</sup>H NMR and <sup>13</sup>C NMR respectively, δ1.56 is related to moisture present in CDCl<sub>3</sub>. Chemical shifts were reported in δ (ppm) relative to TMS as an internal standard and *J* values were given in Hz (hertz). Multiplicity is indicated as, s (singlet); d (doublet); t (triplet); m (multiplet); dd (doublet of doublets), etc. FTIR spectra were recorded on Alpha (Bruker) Infrared Spectrophotometer. High resolution mass spectra (HRMS) [ESI+] were obtained using either a TOF or a double focusing spectrometer. All the 2-en-4-ynyl cyanides were synthesized by using previous report.<sup>1</sup>

## 2. Structures of starting materials

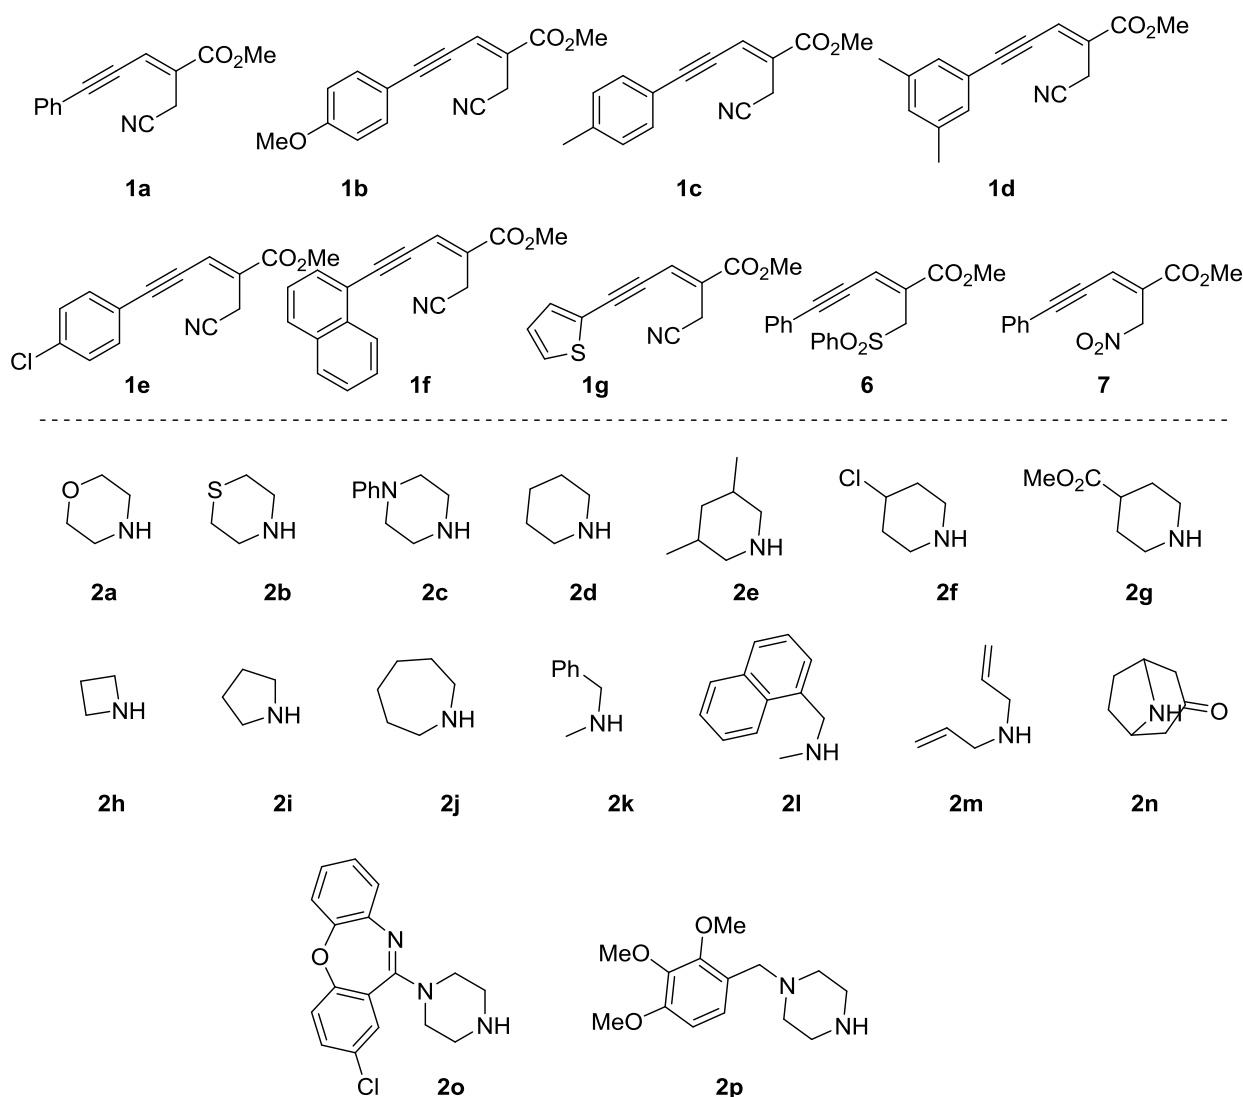

## 3. General reaction and characterization data of compounds

**General procedure for the synthesis of cyclopentenones:** To a stirred solution of 2-en-4-ynyl cyanide <sup>1</sup> (0.2 mmol) in 1 mL acetonitrile were added amine (0.4 mmol, 2.0 equiv), K<sub>2</sub>CO<sub>3</sub> (55 mg, 0.4 mmol, 2.0 equiv). Then reaction mixture was heated to 80 °C and stirred for 2-4 h. The reaction progress was monitored by TLC. After completion of the reaction, mixture was cooled to room temperature, and filtered through a pad of Celite. The filtrate was concentrated in vacuo to afford crude products, which was purified by flash column chromatography on silica gel (Hexane/EtOAc=70:30) to give the pure products.

**(E)-2-(4-Morpholino-2-oxo-3-phenylcyclopent-3-en-1-ylidene)acetonitrile (3a):**

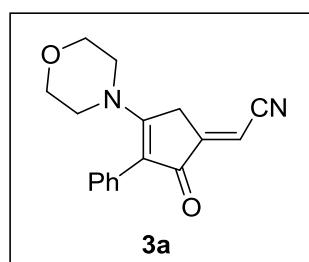

Orange solid, 45 mg, 73% yield, m.p. 220–222 °C,  $R_f = 0.5$  (hexane/ethyl acetate = 7:3);  $^1\text{H}$  NMR (400 MHz,  $\text{CDCl}_3$ )  $\delta$  7.41 – 7.35 (m, 2H), 7.33 – 7.27 (m, 1H), 7.24 – 7.20 (m, 2H), 6.13 (t,  $J = 2.0$  Hz, 1H), 3.67 (s, 4H), 3.58 (d,  $J = 2.0$  Hz, 2H), 3.42 (s, 4H);  $^{13}\text{C}$  NMR (100 MHz,  $\text{CDCl}_3$ )  $\delta$  186.0, 165.4, 154.3, 133.4, 129.8, 128.6, 127.7, 118.2, 116.9, 94.5, 66.5, 49.5, 33.2; IR (KBr):  $\nu_{\text{max}} = 2922, 2217, 1723, 1550, 1441, 1272, 1112, 750 \text{ cm}^{-1}$ ; HRMS (ESI):  $m/z$  calcd for  $\text{C}_{17}\text{H}_{17}\text{N}_2\text{O}_2$   $[\text{M} + \text{H}]^+$ : 281.1285, found: 281.1286.

**(E)-2-(2-Oxo-3-phenyl-4-thiomorpholinocyclopent-3-en-1-ylidene)acetonitrile (3b):**

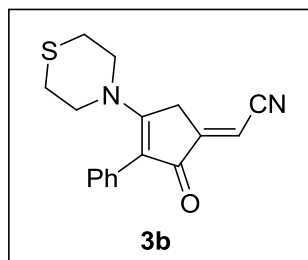

Pale yellow solid, 46 mg, 71% yield, m.p. 201–203 °C,  $R_f = 0.4$  (hexane/ethyl acetate = 7:3);  $^1\text{H}$  NMR (400 MHz,  $\text{CDCl}_3$ )  $\delta$  7.39 (t,  $J = 7.4$  Hz, 2H), 7.31 (t,  $J = 7.3$  Hz, 1H), 7.20 (d,  $J = 7.2$  Hz, 2H), 6.13 (s, 1H), 3.70 (s, 4H), 3.58 (d,  $J = 1.6$  Hz, 2H), 2.62 (s, 4H).;  $^{13}\text{C}$  NMR (100 MHz,  $\text{CDCl}_3$ )  $\delta$  186.1, 165.3, 154.2, 133.8, 129.7, 128.7, 127.8, 118.6, 116.9, 94.5, 51.1, 33.4, 27.5 ; IR (KBr):  $\nu_{\text{max}} = 2922, 2217, 1660, 1545, 1499, 1282, 947, 748 \text{ cm}^{-1}$ ; HRMS (ESI):  $m/z$  calcd for  $\text{C}_{17}\text{H}_{17}\text{N}_2\text{SO}$   $[\text{M} + \text{H}]^+$ : 297.1056, found: 297.1056.

**(E)-2-(2-Oxo-3-phenyl-4-(4-phenylpiperazin-1-yl)cyclopent-3-en-1-ylidene)acetonitrile**

**(3c):**

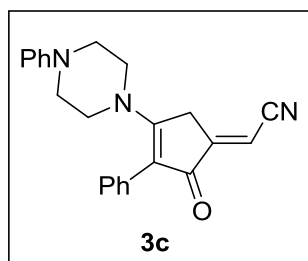

Orange solid, 59 mg, 75% yield, m.p. 202–204 °C,  $R_f = 0.4$  (hexane/ethyl acetate = 7:3);  $^1\text{H}$  NMR (400 MHz,  $\text{CDCl}_3$ )  $\delta$  7.40 (t,  $J = 7.4$  Hz, 2H), 7.34 – 7.27 (m, 3H), 7.26 – 7.23 (m, 2H), 6.93 (t,  $J = 7.3$  Hz, 1H), 6.88 (d,  $J = 7.8$  Hz, 2H), 6.14 (t,  $J = 2.0$  Hz, 1H), 3.64 (d,  $J = 2.0$  Hz, 2H), 3.59 (s, 4H), 3.17 (s, 4H);  $^{13}\text{C}$  NMR (100 MHz,  $\text{CDCl}_3$ )  $\delta$  183.4, 162.8, 151.1, 147.7, 131.0, 127.3, 126.8, 126.0, 125.1, 118.6, 115.7, 114.4, 114.1, 91.9, 46.9, 46.5, 30.8.; IR (KBr):  $\nu_{\text{max}} = 2921, 2216, 1610, 1547, 1227, 882, 752, 694$   $\text{cm}^{-1}$ ; HRMS (ESI):  $m/z$  calcd for  $\text{C}_{23}\text{H}_{22}\text{N}_3\text{O}$   $[\text{M} + \text{H}]^+$ : 356.1757, found: 356.1757.

**(E)-2-(2-Oxo-3-phenyl-4-(piperidin-1-yl)cyclopent-3-en-1-ylidene)acetonitrile (3d):**

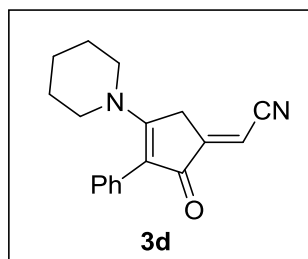

Yellow solid, 42 mg, 69% yield, m.p. 172–174 °C,  $R_f = 0.5$  (hexane/ethyl acetate = 7:3);  $^1\text{H}$  NMR (400 MHz,  $\text{CDCl}_3$ )  $\delta$  7.37 (t,  $J = 7.4$  Hz, 2H), 7.30 – 7.27 (m, 1H), 7.24 – 7.21 (m, 2H), 6.10 (t,  $J = 1.7$  Hz, 1H), 3.57 (d,  $J = 1.9$  Hz, 2H), 3.37 (s, 4H), 1.62 (s, 6H).;  $^{13}\text{C}$  NMR (100 MHz,  $\text{CDCl}_3$ )  $\delta$  185.6, 165.6, 155.2, 134.2, 129.7, 128.4, 127.4, 117.6, 117.2, 93.6, 50.7, 33.4, 26.2, 23.8; IR (KBr):  $\nu_{\text{max}} = 2925, 2214, 1537, 1443, 1297, 1022, 965, 721$   $\text{cm}^{-1}$ ; HRMS (ESI):  $m/z$  calcd for  $\text{C}_{18}\text{H}_{19}\text{N}_2\text{O}$   $[\text{M} + \text{H}]^+$ : 279.1492, found: 279.1496.

**(E)-2-(4-(3,5-Dimethylpiperidin-1-yl)-2-oxo-3-phenylcyclopent-3-en-1-ylidene)acetonitrile**

**(3e):**

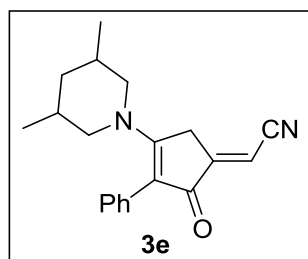

Pale Yellow solid, 49 mg, 72% yield, m.p. 204–206 °C,  $R_f = 0.4$  (hexane/ethyl acetate = 7:3);  $^1\text{H}$  NMR (400 MHz, DMSO- $d_6$ )  $\delta$  7.38 (t,  $J = 7.1$  Hz, 2H), 7.35 – 7.24 (m, 1H), 7.18 (d,  $J = 7.1$  Hz, 2H), 6.05 (s, 1H), 3.77 (s, 3H), 3.38 (s, 1H), 2.67 (s, 1H), 2.27 (s, 1H), 1.74 (d,  $J = 12.1$  Hz, 2H), 1.57 (s, 1H), 0.89 (s, 3H), 0.77 (dd,  $J = 24.2, 12.2$  Hz, 1H), 0.45 (s, 3H);  $^{13}\text{C}$  NMR (100 MHz, DMSO- $d_6$ )  $\delta$  184.8, 166.5, 156.9, 135.7, 130.1, 128.5, 127.3, 117.9, 116.4, 92.7, 56.3, 55.7, 41.3, 33.1, 32.1, 31.0, 18.7; IR (KBr):  $\nu_{\text{max}} = 2923, 2216, 1660, 1547, 1287, 1250, 748, 667$   $\text{cm}^{-1}$ ; HRMS (ESI):  $m/z$  calcd for  $\text{C}_{20}\text{H}_{23}\text{N}_2\text{O}$   $[\text{M} + \text{H}]^+$ : 307.1805, found: 307.1808.

**(E)-2-(4-(4-Chloropiperidin-1-yl)-2-oxo-3-phenylcyclopent-3-en-1-ylidene)acetonitrile**

**(3f):**

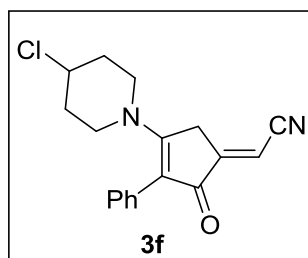

Brown solid, 47 mg, 68% yield, m.p. 143–145 °C,  $R_f = 0.4$  (hexane/ethyl acetate = 7:3);  $^1\text{H}$  NMR (400 MHz,  $\text{CDCl}_3$ )  $\delta$  7.39 (t,  $J = 6.7$  Hz, 2H), 7.33 – 7.28 (m, 1H), 7.22 (d,  $J = 7.3$  Hz, 2H), 6.13 (s, 1H), 4.32 (s, 1H), 3.59 (s, 4H), 3.41 (s, 2H), 2.06 (s, 2H), 1.88 (s, 2H);  $^{13}\text{C}$  NMR (100 MHz,  $\text{CDCl}_3$ )  $\delta$  185.9, 165.4, 154.5, 133.6, 129.7, 128.6, 127.7, 118.2, 116.9, 94.4, 54.9, 46.1, 34.8, 33.5.; IR (KBr):  $\nu_{\text{max}} = 2925, 2216, 1596, 1287, 1253, 1126, 750, 761, 708$   $\text{cm}^{-1}$ ; HRMS (ESI):  $m/z$  calcd for  $\text{C}_{18}\text{H}_{18}\text{ClN}_2\text{O}$   $[\text{M} + \text{H}]^+$ : 313.1102, found: 313.1103.

**Methyl(*E*)-1-(4-(cyanomethylene)-3-oxo-2-phenylcyclopent-1-en-1-yl)piperidine-4-carboxylate (3g):**

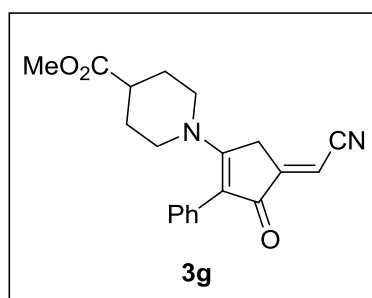

Brown solid, 55 mg, 75% yield, m.p. 132–134 °C,  $R_f = 0.4$  (hexane/ethyl acetate = 7:3);  $^1\text{H}$  NMR (400 MHz,  $\text{CDCl}_3$ )  $\delta$  7.38 (t,  $J = 7.4$  Hz, 2H), 7.30 (d,  $J = 7.4$  Hz, 1H), 7.21 (d,  $J = 7.0$  Hz, 2H), 6.12 (s, 1H), 3.74 (s, 2H), 3.70 (s, 3H), 3.58 (d,  $J = 1.7$  Hz, 2H), 3.09 (s, 2H), 2.64 – 2.54 (m, 1H), 1.90 (s, 2H), 1.76 (s, 2H);  $^{13}\text{C}$  NMR (101 MHz,  $\text{CDCl}_3$ )  $\delta$  185.8, 173.8, 165.5, 154.7, 133.8, 129.7, 128.6, 127.6, 118.0, 117.0, 94.1, 52.1, 48.6, 39.9, 33.4, 28.1; IR (KBr):  $\nu_{\text{max}} = 2952, 2216, 1728, 1542, 1442, 1913, 1037, 749, 696$   $\text{cm}^{-1}$ ; HRMS (ESI):  $m/z$  calcd for  $\text{C}_{20}\text{H}_{21}\text{N}_2\text{O}_3$   $[\text{M} + \text{H}]^+$ : 337.1547, found: 337.1542.

**(*E*)-2-(4-(Azetidin-1-yl)-2-oxo-3-phenylcyclopent-3-en-1-ylidene)acetonitrile (3h):**

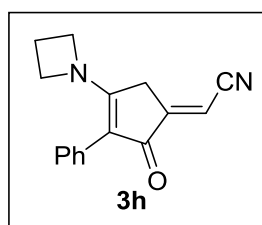

Pale Yellow solid, 35 mg, 63% yield, m.p. 180–182 °C,  $R_f = 0.3$  (hexane/ethyl acetate = 7:3);  $^1\text{H}$  NMR (500 MHz,  $\text{CDCl}_3$ )  $\delta$  7.36 – 7.32 (m, 2H), 7.28 – 7.25 (m, 1H), 7.25 – 7.22 (m, 2H), 6.12 (t,  $J = 2.0$  Hz, 1H), 4.36 (t,  $J = 7.7$  Hz, 2H), 3.83 (t,  $J = 7.7$  Hz, 2H), 3.38 (d,  $J = 2.0$  Hz, 2H), 2.43 – 2.36 (m, 2H);  $^{13}\text{C}$  NMR (125 MHz,  $\text{CDCl}_3$ )  $\delta$  184.3, 165.4, 155.3, 131.2, 130.2, 127.8, 127.3, 117.0, 116.7, 94.3, 55.0, 53.0, 30.3, 16.8.; IR (KBr):  $\nu_{\text{max}} = 2926, 2215, 1657, 1541, 1441, 1278, 747, 693$   $\text{cm}^{-1}$ ; HRMS (ESI):  $m/z$  calcd for  $\text{C}_{16}\text{H}_{15}\text{N}_2\text{O}$   $[\text{M} + \text{H}]^+$ : 251.1179, found: 251.1181.

**(E)-2-(2-Oxo-3-phenyl-4-(pyrrolidin-1-yl)cyclopent-3-en-1-ylidene)acetonitrile (3i):**

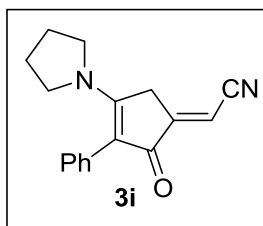

Brown solid, 43 mg, 74% yield, m.p. 150–152 °C,  $R_f = 0.5$  (hexane/ethyl acetate = 7:3);  $^1\text{H}$  NMR (400 MHz,  $\text{CDCl}_3$ )  $\delta$  7.37 – 7.27 (m, 3H), 7.24 – 7.17 (m, 2H), 6.12 (s, 1H), 3.67 (t,  $J = 6.2$  Hz, 2H), 3.60 (s, 2H), 3.01 (t,  $J = 6.0$  Hz, 2H), 2.00 – 1.92 (m, 2H), 1.88 – 1.79 (m, 2H);  $^{13}\text{C}$  NMR (100 MHz,  $\text{CDCl}_3$ )  $\delta$  185.2, 166.1, 154.6, 133.9, 129.8, 128.6, 127.6, 118.0, 117.0, 94.2, 50.1, 33.7, 23.8.; IR (KBr):  $\nu_{\text{max}} = 2877, 2216, 1546, 1445, 1287, 750 \text{ cm}^{-1}$ ; HRMS (ESI):  $m/z$  calcd for  $\text{C}_{17}\text{H}_{17}\text{N}_2\text{O}$   $[\text{M} + \text{H}]^+$ : 265.1335, found: 265.1338.

**(E)-2-(4-(Azepan-1-yl)-2-oxo-3-phenylcyclopent-3-en-1-ylidene)acetonitrile (3j):**

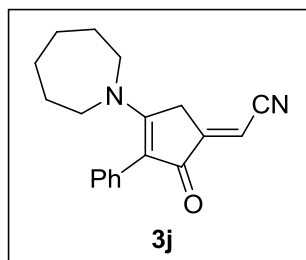

Pale Yellow solid, 46 mg, 71% yield, m.p. 146–148 °C,  $R_f = 0.4$  (hexane/ethyl acetate = 7:3);  $^1\text{H}$  NMR (500 MHz,  $\text{CDCl}_3$ )  $\delta$  7.37 – 7.33 (m, 2H), 7.30 – 7.27 (m, 1H), 7.20 – 7.18 (m, 2H), 6.10 (t,  $J = 2.0$  Hz, 1H), 3.62 (d,  $J = 2.0$  Hz, 2H), 3.60 (s, 2H), 3.28 (s, 2H), 1.83 (s, 2H), 1.68 (s, 2H), 1.52 (s, 2H), 1.36 (s, 2H);  $^{13}\text{C}$  NMR (100 MHz,  $\text{CDCl}_3$ )  $\delta$  185.6, 166.2, 155.0, 134.4, 130.4, 128.2, 127.4, 118.4, 117.2, 93.6, 52.5, 33.2, 29.2, 27.4, 26.6, 26.4; IR (KBr):  $\nu_{\text{max}} = 2925, 2215, 1659, 1535, 1438, 1274, 743, 617 \text{ cm}^{-1}$ ; HRMS (ESI):  $m/z$  calcd for  $\text{C}_{19}\text{H}_{21}\text{N}_2\text{O}$   $[\text{M} + \text{H}]^+$ : 293.1648, found: 293.1652.

**(E)-2-(4-(Benzyl(methyl)amino)-2-oxo-3-phenylcyclopent-3-en-1-ylidene)acetonitrile (3k):**

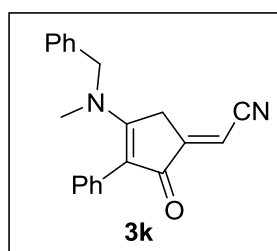

Yellow syrup, 50 mg, 72% yield,  $R_f = 0.4$  (hexane/ethyl acetate = 7:3)  $^1\text{H}$  NMR (400 MHz,  $\text{CDCl}_3$ )  $\delta$  7.42 – 7.10 (m, 10H), 6.14 (s, 1H), 4.58 (s, 2H), 3.68 (s, 2H), 2.82 (s, 3H);  $^{13}\text{C}$  NMR (100 MHz,  $\text{CDCl}_3$ )  $\delta$  186.0, 165.4, 154.3, 133.4(3C), 129.8(3C), 128.6, 127.7, 118.2, 116.9, 94.5, 66.5, 49.5, 33.2; IR (KBr neat):  $\nu_{\text{max}}$  3016, 2858, 2217, 1551, 1410, 1215, 1155, 746, 696  $\text{cm}^{-1}$ ; HRMS (ESI):  $m/z$  calcd for  $\text{C}_{21}\text{H}_{19}\text{N}_2\text{O}$   $[\text{M} + \text{H}]^+$ : 315.1492, found: 315.1492.

**(E)-2-(4-(Methyl(naphthalen-1-ylmethyl)amino)-2-oxo-3-phenylcyclopent-3-en-1-ylidene)acetonitrile (3l):**

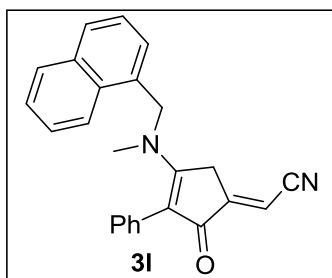

Pale Yellow solid, 53 mg, 66% yield, m.p. 156–158 °C,  $R_f = 0.4$  (hexane/ethyl acetate = 7:3)  $^1\text{H}$  NMR (400 MHz,  $\text{CDCl}_3$ )  $\delta$  7.94 – 7.82 (m, 2H), 7.51 (d,  $J = 28.1$  Hz, 3H), 7.31 – 7.16 (m, 7H), 6.15 (s, 1H), 5.04 (s, 2H), 3.70 (s, 2H), 2.91 (s, 3H);  $^{13}\text{C}$  NMR (100 MHz,  $\text{CDCl}_3$ )  $\delta$  186.0, 167.4, 154.7, 133.9, 133.5, 130.7, 130.3, 129.2, 129.0, 128.2, 127.4, 126.1, 126.4, 125.3, 121.9, 118.9, 116.9, 94.4, 55.7, 33.4.; IR (KBr):  $\nu_{\text{max}}$  = 3011, 2216, 1545, 795, 747, 696  $\text{cm}^{-1}$ ; HRMS (ESI):  $m/z$  calcd for  $\text{C}_{25}\text{H}_{21}\text{N}_2\text{O}$   $[\text{M} + \text{H}]^+$ : 365.1648, found: 365.1638.



**(E)-2-(4-(Diallylamino)-2-oxo-3-phenylcyclopent-3-en-1-ylidene)acetonitrile (3m):**

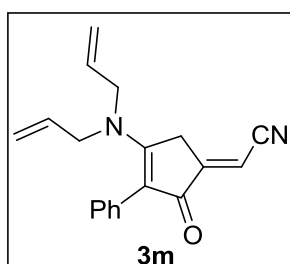

Brown solid, 48 mg, 75% yield, m.p. 87–89 °C,  $R_f = 0.4$  (hexane/ethyl acetate = 7:3);  $^1\text{H}$  NMR (400 MHz,  $\text{CDCl}_3$ )  $\delta$  7.39 – 7.34 (m, 2H), 7.30 (m, 1H), 7.20 – 7.18 (m, 2H), 6.11 (t,  $J = 2.0$  Hz, 1H), 5.61 (s, 2H), 5.25 (s, 4H), 3.88 (d,  $J = 3.4$  Hz, 4H), 3.64 (d,  $J = 2.0$  Hz, 2H).  $^{13}\text{C}$  NMR (101 MHz,  $\text{CDCl}_3$ )  $\delta$  186.1, 166.7, 154.4, 133.6, 131.4, 130.3, 128.4, 127.8, 118.8, 118.5, 116.9, 94.5, 52.2, 33.3.; IR (KBr):  $\nu_{\text{max}} = 3017, 2926, 2217, 1664, 1543, 1290, 926, 747, 701 \text{ cm}^{-1}$ ; HRMS (ESI):  $m/z$  calcd for  $\text{C}_{19}\text{H}_{19}\text{N}_2\text{O}$   $[\text{M} + \text{H}]^+$ : 291.1492, found: 291.1497.

**(E)-2-(2-Oxo-4-(3-oxo-8-azabicyclo[3.2.1]octan-8-yl)-3-phenylcyclopent-3-en-1-ylidene)acetonitrile (3n):**

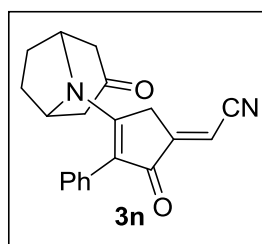

Pale Yellow solid, 47 mg, 67% yield, m.p. 189–191 °C,  $R_f = 0.4$  (hexane/ethyl acetate = 7:3)  $^1\text{H}$  NMR (400 MHz,  $\text{CDCl}_3$ )  $\delta$  7.44 – 7.33 (m, 3H), 7.26 – 7.19 (m, 2H), 6.17 (s, 1H), 4.57 (s, 1H), 4.21 (s, 1H), 3.70 (s, 2H), 2.62 (d,  $J = 60.8$  Hz, 4H), 2.17 – 1.65 (m, 4H);  $^{13}\text{C}$  NMR (100 MHz,  $\text{CDCl}_3$ )  $\delta$  204.9, 185.9, 161.5, 154.2, 133.2, 129.9, 128.8, 128.2, 118.9, 116.8, 95.0, 57.1, 54.7, 49.7, 48.3, 33.1, 28.3.; IR (KBr):  $\nu_{\text{max}} = 2924, 2217, 1715, 1543, 1496, 1285, 1198, 997, 750, 614 \text{ cm}^{-1}$ ; HRMS (ESI):  $m/z$  calcd for  $\text{C}_{20}\text{H}_{19}\text{N}_2\text{O}_2$   $[\text{M} + \text{H}]^+$ : 319.1441, found: 319.1434.

**(E)-2-(4-(4-(2-Chlorodibenzo[*b,f*][1,4]oxazepin-11-yl)piperazin-1-yl)-2-oxo-3-phenylcyclopent-3-en-1-ylidene)acetonitrile (3o):**

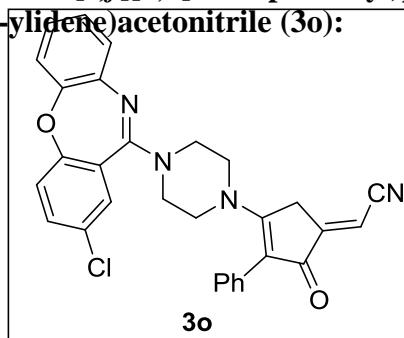

Light Orange solid, 82 mg, 73% yield, m.p. 213–215 °C,  $R_f = 0.3$  (hexane/ethyl acetate = 7:3)  $^1\text{H}$  NMR (400 MHz,  $\text{CDCl}_3$ )  $\delta$  7.39 (t,  $J = 7.4$  Hz, 3H), 7.31 (d,  $J = 7.0$  Hz, 1H), 7.21 (dd,  $J = 17.7, 8.1$  Hz, 4H), 7.11 (d,  $J = 6.8$  Hz, 3H), 7.04 (d,  $J = 8.4$  Hz, 1H), 6.15 (s, 1H), 3.63 (s, 2H), 3.54 (s, 8H);  $^{13}\text{C}$  NMR (100 MHz,  $\text{CDCl}_3$ )  $\delta$  186.0, 165.5, 159.4, 158.3, 154.3, 151.7, 139.4, 133.5, 133.1, 130.6, 129.8, 128.7, 128.6, 127.7, 127.1, 126.0, 125.4, 124.4, 123.0, 120.3, 118.4, 116.9, 94.6, 48.7, 47.4, 33.3.; IR (KBr):  $\nu_{\text{max}} = 3058, 2924, 2217, 1662, 1548, 1443, 1228, 750, 671$   $\text{cm}^{-1}$ ; HRMS (ESI):  $m/z$  calcd for  $\text{C}_{30}\text{H}_{24}\text{ClN}_4\text{O}_2$   $[\text{M} + \text{H}]^+$ : 507.1582, found: 507.1578

**(E)-2-(2-Oxo-3-phenyl-4-(4-(2,3,4-trimethoxybenzyl)piperazin-1-yl)cyclopent-3-en-1-ylidene)acetonitrile (3p):**

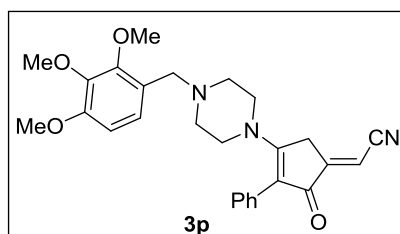

Brown solid, 69 mg, 68% yield, m.p. 110–112 °C,  $R_f = 0.3$  (hexane/ethyl acetate = 7:3);  $^1\text{H}$  NMR (400 MHz,  $\text{CDCl}_3$ )  $\delta$  7.35 (t,  $J = 7.4$  Hz, 2H), 7.29 – 7.24 (m, 1H), 7.20 (d,  $J = 7.1$  Hz, 2H), 6.91 (d,  $J = 8.5$  Hz, 2H), 6.62 (d,  $J = 8.5$  Hz, 2H), 6.11 (s, 1H), 3.86 (s, 6H), 3.84 (s, 3H), 3.56 (d,  $J = 1.6$  Hz, 2H), 3.47 (s, 2H), 3.40 (s, 4H), 2.46 (s, 4H).;  $^{13}\text{C}$  NMR (101 MHz,  $\text{CDCl}_3$ )  $\delta$  185.8, 165.4, 154.8, 153.3, 152.6, 142.3, 133.7, 129.8, 128.5, 127.5, 125.1, 122.72, 117.9, 117.0, 107.0, 94.0, 61.2, 60.8, 56.2, 56.0, 52.5, 49.4, 33.3; IR (KBr):  $\nu_{\text{max}} = 2931,$

2216, 1549, 1497, 1278, 1095, 751, 697  $\text{cm}^{-1}$ ; HRMS (ESI):  $m/z$  calcd for  $\text{C}_{27}\text{H}_{30}\text{N}_3\text{O}_4$  [ $\text{M} + \text{H}$ ] $^+$ : 460.2231, found: 460.2223.

**(E)-2-(3-(4-Methoxyphenyl)-4-morpholino-2-oxocyclopent-3-en-1-ylidene)acetonitrile**

**(3q):**

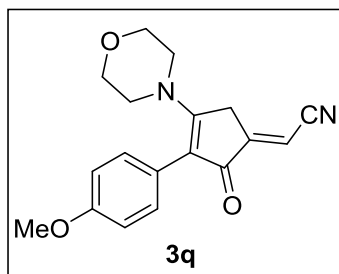

Orange solid, 51 mg, 75% yield, m.p. 203–205  $^{\circ}\text{C}$ ,  $R_f = 0.4$  (hexane/ethyl acetate = 7:3)  $^1\text{H}$  NMR (400 MHz,  $\text{CDCl}_3$ )  $\delta$  7.14 (d,  $J = 8.7$  Hz, 2H), 6.92 (d,  $J = 8.7$  Hz, 2H), 6.12 (s, 1H), 3.82 (s, 3H), 3.68 (s, 4H), 3.56 (d,  $J = 1.8$  Hz, 2H), 3.44 (s, 4H).;  $^{13}\text{C}$  NMR (100 MHz,  $\text{CDCl}_3$ )  $\delta$  186.3, 165.3, 159.0, 154.3, 130.1, 125.3, 117.1, 116.9, 114.1, 94.3, 66.5, 55.3, 49.4, 33.2.; IR (KBr):  $\nu_{\text{max}} = 2922, 2216, 1659, 1547, 1242, 748$   $\text{cm}^{-1}$ ; HRMS (ESI):  $m/z$  calcd for  $\text{C}_{18}\text{H}_{19}\text{N}_2\text{O}_3$  [ $\text{M} + \text{H}$ ] $^+$ : 311.1390, found: 311.1382.

**(E)-2-(4-Morpholino-2-oxo-3-(p-tolyl)cyclopent-3-en-1-ylidene)acetonitrile (3r):**

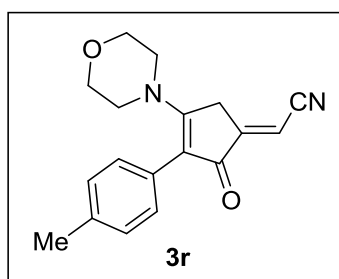

Brown solid, 46 mg, 71% yield, m.p. 199–201  $^{\circ}\text{C}$ ,  $R_f = 0.4$  (hexane/ethyl acetate = 7:3) ;  $^1\text{H}$  NMR (400 MHz,  $\text{CDCl}_3$ )  $\delta$  7.19 (d,  $J = 7.8$  Hz, 2H), 7.10 (d,  $J = 7.9$  Hz, 2H), 6.12 (s, 1H), 3.68 (s, 4H), 3.56 (d,  $J = 1.6$  Hz, 2H), 3.43 (s, 4H), 2.35 (s, 3H);  $^{13}\text{C}$  NMR (100 MHz,  $\text{CDCl}_3$ )  $\delta$  186.2, 165.3, 154.4, 137.5, 130.3, 129.7, 129.3, 118.3, 116.9, 94.4, 66.5, 49.4, 33.8, 21.3; IR (KBr):  $\nu_{\text{max}} = 2922, 2856, 2216, 1660, 1546, 1441, 744, 663$   $\text{cm}^{-1}$ ; HRMS (ESI):  $m/z$  calcd for  $\text{C}_{18}\text{H}_{19}\text{N}_2\text{O}_2$  [ $\text{M} + \text{H}$ ] $^+$ : 295.1441, found: 295.1436.

**(E)-2-(3-(3,5-Dimethylphenyl)-4-morpholino-2-oxocyclopent-3-en-1-ylidene)acetonitrile**

**(3s):**

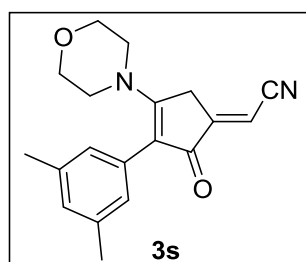

Pale Yellow solid, 52 mg, 76% yield, m.p. 161–163 °C,  $R_f = 0.4$  (hexane/ethyl acetate = 7:3);  $^1\text{H}$  NMR (400 MHz,  $\text{CDCl}_3$ )  $\delta$  6.92 (s, 1H), 6.82 (s, 2H), 6.12 (s, 1H), 3.68 (s, 4H), 3.56 (s, 2H), 3.42 (s, 4H), 2.30 (s, 6H);  $^{13}\text{C}$  NMR (101 MHz,  $\text{CDCl}_3$ )  $\delta$  186.1, 165.3, 154.4, 138.1, 133.1, 129.5, 127.5, 118.6, 116.9, 94.3, 66.5, 49.5, 33.1, 21.4.; IR (KBr):  $\nu_{\text{max}} = 2919, 2216, 1661, 1544, 1114, 749, 667\text{cm}^{-1}$ ; HRMS (ESI):  $m/z$  calcd for  $\text{C}_{19}\text{H}_{21}\text{N}_2\text{O}_2$   $[\text{M} + \text{H}]^+$ : 309.1598, found: 309.1598.

**(E)-2-(3-(4-Chlorophenyl)-4-morpholino-2-oxocyclopent-3-en-1-ylidene)acetonitrile (3t):**

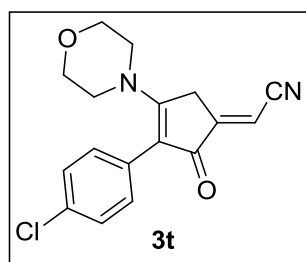

Brown solid, 51 mg, 73% yield, m.p. 223–225 °C,  $R_f = 0.4$  (hexane/ethyl acetate = 7:3)  $^1\text{H}$  NMR (400 MHz,  $\text{CDCl}_3$ )  $\delta$  7.36 (d,  $J = 8.0$  Hz, 2H), 7.17 (d,  $J = 8.3$  Hz, 2H), 6.13 (s, 1H), 3.69 (s, 4H), 3.58 (s, 2H), 3.43 (s, 4H);  $^{13}\text{C}$  NMR (125 MHz,  $\text{CDCl}_3$ )  $\delta$  185.8, 165.6, 153.1, 133.6, 131.8, 131.1, 128.8, 128.6, 116.7, 94.8, 66.4, 49.6, 33.2.; IR (KBr):  $\nu_{\text{max}} = 2923, 2217, 1663, 1548, 1496, 1284, 748, 666\text{ cm}^{-1}$ ; HRMS (ESI):  $m/z$  calcd for  $\text{C}_{17}\text{H}_{16}\text{ClN}_2\text{O}_2$   $[\text{M} + \text{H}]^+$ : 315.0895, found: 315.0896.

**(E)-2-(4-Morpholino-3-(naphthalen-1-yl)-2-oxocyclopent-3-en-1-ylidene)acetonitrile**

**(3u):**

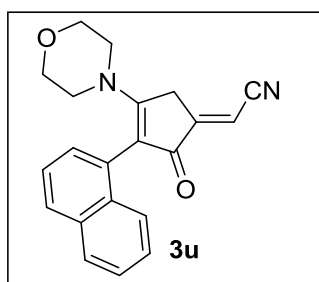

Brown solid, 50 mg, 69% yield, m.p. 103–105 °C,  $R_f = 0.4$  (hexane/ethyl acetate = 7:3)  $^1\text{H}$  NMR (500 MHz,  $\text{DMSO-}d_6$ )  $\delta$  7.95 (d,  $J = 7.5$  Hz, 1H), 7.90 (d,  $J = 8.2$  Hz, 1H), 7.69 (d,  $J = 8.0$  Hz, 1H), 7.52 (dd,  $J = 15.3, 7.1$  Hz, 3H), 7.31 (d,  $J = 6.6$  Hz, 1H), 6.11 (t,  $J = 1.7$  Hz, 1H), 3.93 (m, 2H), 3.75 – 3.56 (m, 4H), 3.23 – 2.74 (m, 4H);  $^{13}\text{C}$  NMR (100 MHz,  $\text{DMSO-}d_6$ )  $\delta$  185.6, 167.9, 156.6, 133.7, 132.8, 132.3, 128.8, 128.7, 128.27, 126.7, 126.6, 126.2, 126.1, 117.9, 114.5, 93.3, 66.7, 65.8, 49.7, 49.0, 33.1; IR (KBr):  $\nu_{\text{max}} = 2922, 2216, 1545, 1441, 1294, 749$   $\text{cm}^{-1}$ ; HRMS (ESI):  $m/z$  calcd for  $\text{C}_{21}\text{H}_{19}\text{N}_2\text{O}_2$   $[\text{M} + \text{H}]^+$ : 331.1441, found: 331.1442.

**(E)-2-(4-Morpholino-2-oxo-3-(thiophen-2-yl)cyclopent-3-en-1-ylidene)acetonitrile (3v):**

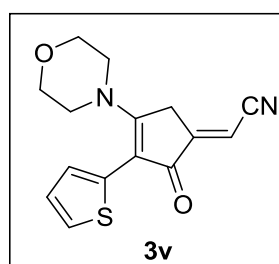

Yellow solid, 44 mg, 70% yield, m.p. 208–210 °C,  $R_f = 0.4$  (hexane/ethyl acetate = 7:3);  $^1\text{H}$  NMR (500 MHz,  $\text{CDCl}_3$ )  $\delta$  7.37 (dd,  $J = 5.1, 0.8$  Hz, 1H), 7.06 (dd,  $J = 5.1, 3.5$  Hz, 1H), 6.92 – 6.89 (m, 1H), 6.14 (s, 1H), 3.75 – 3.71 (m, 4H), 3.58 (d,  $J = 2.0$  Hz, 2H), 3.56 – 3.49 (m, 4H);  $^{13}\text{C}$  NMR (100 MHz,  $\text{CDCl}_3$ )  $\delta$  185.8, 166.0, 153.4, 133.6, 128.2, 127.2, 126.9, 116.7, 110.8, 95.0, 66.5, 49.5, 33.3; IR (KBr):  $\nu_{\text{max}} = 2922, 2217, 1557, 1552, 1274, 1112, 745, 704$   $\text{cm}^{-1}$ ; HRMS (ESI):  $m/z$  calcd for  $\text{C}_{15}\text{H}_{15}\text{N}_2\text{O}_2$   $[\text{M} + \text{H}]^+$ : 287.0849, found: 287.0849.

**2-(4-Morpholino-2-oxo-3-phenylcyclopent-3-en-1-yl)acetonitrile (4):**

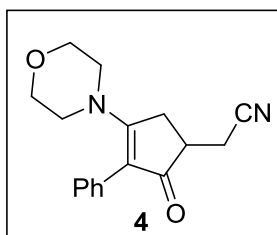

A round-bottom flask was charged with cyclopentenone **3a** (30 mg, 0.17 mmol, 1 equiv) and EtOAc (2 mL) under a nitrogen atmosphere, and then 10% Pd–C catalyst (~5 mg) was added. The reaction mixture was stirred at room temperature under hydrogen atmosphere (16 h) until consumption of starting material **3a** as monitored by thin layer chromatography (TLC). The reaction mixture was filtered through a pad of celite and concentrated under reduced pressure, and the residue was directly subjected to flash column chromatography on silica gel (30% EtOAc in hexanes;  $R_f = 0.4$ ) to afford the desired product **4**. Half white solid, 24 mg, 80% yield, m.p. 157–159 °C,  $R_f = 0.4$  (hexane/ethyl acetate = 7:3);  $^1\text{H}$  NMR (400 MHz,  $\text{CDCl}_3$ )  $\delta$  7.35 (t,  $J = 7.4$  Hz, 2H), 7.27 (t,  $J = 3.7$  Hz, 1H), 7.19 – 7.16 (m, 2H), 3.64 (t,  $J = 4.7$  Hz, 4H), 3.37 – 3.30 (m, 4H), 3.08 – 3.02 (m, 1H), 2.96 (dd,  $J = 16.8, 4.2$  Hz, 1H), 2.89 – 2.83 (m, 1H), 2.63 – 2.50 (m, 2H);  $^{13}\text{C}$  NMR (100 MHz,  $\text{CDCl}_3$ )  $\delta$  199.0, 168.7, 133.9, 130.2, 128.4, 127.3, 118.4, 113.6, 66.4, 49.0, 39.9, 33.4, 20.0. IR (KBr):  $\nu_{\text{max}} = 2921, 2245, 1659, 1556, 1304, 752, 701\text{cm}^{-1}$ ; HRMS (ESI):  $m/z$  calcd for  $\text{C}_{17}\text{H}_{19}\text{N}_2\text{O}_2$   $[\text{M} + \text{H}]^+$ : 283.1441, found: 282.1435.

**(E)-(4-(methylamino)-2-oxo-3-phenylcyclopent-3-en-1-ylidene)methylformate (5):**

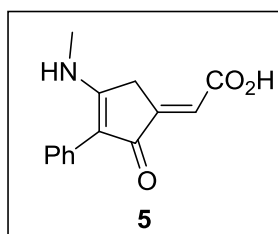

To a solution of cyclopentenone **3k** (32 mg, 0.10 mol, 1 equiv) in 2 mL of MeOH was added MeOH.HCL (2 mL). The reaction mixture was stirred for 16 h at reflux temperature. The

completion of the reaction was monitored by TLC followed by quenched with  $\text{NaHCO}_3$  (5 mL), extracted with ethyl acetate ( $3 \times 5$  mL), dried over  $\text{Na}_2\text{SO}_4$ , concentrated under vacuo, and then purified by flash chromatography (5% MeOH in DCM;  $R_f = 0.3$ ) to afford **5**. Brown solid, 19 mg, 78% yield, m.p. 168-170 °C,  $^1\text{H}$  NMR (500 MHz,  $\text{CDCl}_3$ )  $\delta$  7.55 (d,  $J = 7.4$  Hz, 2H), 7.47 (t,  $J = 7.6$  Hz, 2H), 7.37 (t,  $J = 7.4$  Hz, 1H), 6.37 (s, 1H), 3.80 (s, 3H), 3.52 (s, 2H);  $^{13}\text{C}$  NMR (101 MHz,  $\text{CDCl}_3 + \text{DMSO-}d_6$ )  $\delta$  202.1, 180.1, 171.2, 152.5, 135.3, 133.6, 132.8, 132.4, 126.9, 117.1, 56.4, 43.2.; IR (KBr):  $\nu_{\text{max}} = 2923, 2853, 1715, 1391, 1214, 767, 695$   $\text{cm}^{-1}$ ; HRMS (ESI):  $m/z$  calcd for  $\text{C}_{14}\text{H}_{14}\text{N}_2\text{O}_3$   $[\text{M} + \text{H}]^+$ : 244.0968, found: 244.0961.

#### **Methyl (Z)-5-phenyl-2-((phenylsulfonyl)methyl)pent-2-en-4-ynoate (6):**

Reaction was conducted using modified condition,<sup>4</sup> To a stirred solution of corresponding MBH-alcohol **1** (1 equiv) in 5 mL of PEG 400 was added sodium phenylsulfinate (1.5 equiv) at room temperature and stirred for 1h at 80 °C. After completion of the reaction, the mixture was extracted with  $\text{Et}_2\text{O}$  (4 x 10 mL). The combined organic layer was dried over anhydrous  $\text{Na}_2\text{SO}_4$  and concentrated in vacuo. The residue was purified by column chromatography on silica gel (EtOAc: hexanes) to afford the corresponding product.

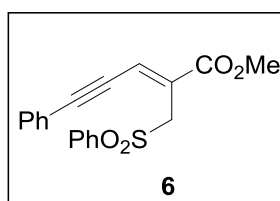

Half white solid, 262 mg, 83% yield, m.p. 121–123 °C,  $R_f = 0.5$  (hexane/ethyl acetate = 7:3);  $^1\text{H}$  NMR (500 MHz,  $\text{CDCl}_3$ )  $\delta$  7.92 – 7.85 (m, 2H), 7.52 (d,  $J = 7.5$  Hz, 1H), 7.44 (t,  $J = 7.7$  Hz, 2H), 7.40- 7.37 (m, 5H), 7.04 (s, 1H), 4.52 (s, 2H), 3.69 (s, 3H).;  $^{13}\text{C}$  NMR (125 MHz,  $\text{CDCl}_3$ )  $\delta$  165.37, 138.82, 133.80, 132.14, 129.92, 129.81, 129.06, 128.81, 128.49, 126.52, 121.66, 104.22, 84.62, 56.73, 52.64; IR (KBr):  $\nu_{\text{max}} = 2951, 2195, 1715, 1610, 1439, 1141, 1082, 728$   $\text{cm}^{-1}$ ; HRMS (ESI):  $m/z$  calcd for  $\text{C}_{19}\text{H}_{17}\text{SO}_4$   $[\text{M} + \text{H}]^+$ : 341.0842, found: 341.0848.

**Methyl (E)-2-(nitromethyl)-5-phenylpent-2-en-4-ynoate (7):** To a stirred solution of corresponding MBH-acetate <sup>1</sup> (1 equiv) in 10 mL of aqueous methanol (MeOH:water 9:1) was added sodium nitrate (1.5 equiv) at room temperature and stirred for given time. After completion of the reaction, the mixture was diluted with water (10 mL) and extracted with CH<sub>2</sub>Cl<sub>2</sub> (3 x 20 mL). The combined organic layer was dried over anhydrous Na<sub>2</sub>SO<sub>4</sub> and concentrated in vacuo. The residue was purified by column chromatography on silica gel (EtOAc: hexanes) to afford the corresponding product.

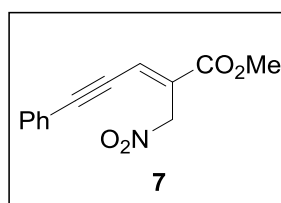

Half white solid, 195 mg, 78% yield, m.p. 58-60 °C, R<sub>f</sub> = 0.5 (hexane/ethyl acetate = 7:3); <sup>1</sup>H NMR (500 MHz, CDCl<sub>3</sub>) δ 7.52 – 7.48 (m, 2H), 7.44 – 7.36 (m, 3H), 7.29 (s, 1H), 5.48 (s, 2H), 3.85 (s, 3H); <sup>13</sup>C NMR (100 MHz, CDCl<sub>3</sub>) δ 164.97, 132.20, 130.27, 130.07, 128.68, 128.31, 121.22, 106.35, 83.86, 72.07, 52.84.; IR (KBr): ν<sub>max</sub> = 2292, 2194, 1713, 1555, 1217, 752 cm<sup>-1</sup>; HRMS (ESI): m/z calcd for C<sub>13</sub>H<sub>10</sub>NO<sub>4</sub> [M - H]<sup>+</sup>: 244.0607, found: 244.0604.

**Methyl (E)-2-(morpholinomethyl)-5-phenylpent-2-en-4-ynoate (8):**

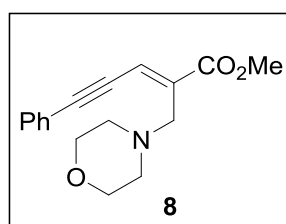

Yellow solid, 47 mg, 81% yield, m.p. 123–125 °C, R<sub>f</sub> = 0.4 (hexane/ethyl acetate = 7:1) <sup>1</sup>H NMR (500 MHz, CDCl<sub>3</sub>) δ 7.48 (dd, *J* = 7.5, 1.8 Hz, 2H), 7.36 (dt, *J* = 8.7, 4.2 Hz, 3H), 6.99 (s, 1H), 3.81 (s, 3H), 3.71 – 3.68 (m, 4H), 3.52 (s, 2H), 2.59 – 2.57 (m, 4H); <sup>13</sup>C NMR (101 MHz, CDCl<sub>3</sub>) δ 167.18, 138.17, 131.81, 129.42, 128.59, 123.03, 122.32, 101.91, 85.70,



67.02, 55.72, 53.74, 52.31; IR (KBr):  $\nu_{\max}$  = 2946, 2855, 2196, 1715, 1608, 1240, 1117, 757  $\text{cm}^{-1}$ ; HRMS (ESI):  $m/z$  calcd for  $\text{C}_{17}\text{H}_{20}\text{NO}_3$   $[\text{M} + \text{H}]^+$ : 286.1438, found: 286.1437.

### **X-ray Crystallography.**

X-ray data for the compound was collected at room temperature on a Bruker D8 QUEST instrument with an I $\mu$ S Mo microsource ( $\lambda$  = 0.7107 Å) and a PHOTON-III detector. The raw data frames were reduced and corrected for absorption effects using the Bruker Apex 3 software suite programs [2]. The structure was solved using intrinsic phasing method [2] and further refined with the SHELXL [3] program and expanded using Fourier techniques. Anisotropic displacement parameters were included for all non-hydrogen atoms. All C bound H atoms were positioned geometrically and treated as riding on their parent C atoms [C-H = 0.93-0.97 Å, and  $U_{\text{iso}}(\text{H}) = 1.5U_{\text{eq}}(\text{C})$  for methyl H or  $1.2U_{\text{eq}}(\text{C})$  for other H atoms].

### **Crystal structure determination of 3a**

**Crystal Data** for  $\text{C}_{17}\text{H}_{16}\text{N}_2\text{O}_2$  ( $M$  = 280.32 g/mol): monoclinic, space group  $\text{P}2_1/c$  (no. 14),  $a$  = 10.2278(10) Å,  $b$  = 8.9747(9) Å,  $c$  = 15.8181(18) Å,  $\beta$  = 106.584(4)°,  $V$  = 1391.6(3) Å<sup>3</sup>,  $Z$  = 4,  $T$  = 294(2) K,  $\mu(\text{MoK}\alpha)$  = 0.089  $\text{mm}^{-1}$ ,  $D_{\text{calc}}$  = 1.338  $\text{g}/\text{cm}^3$ , 19954 reflections measured ( $5.274^\circ \leq 2\theta \leq 61.102^\circ$ ), 4257 unique ( $R_{\text{int}} = 0.0478$ ,  $R_{\text{sigma}} = 0.0538$ ) which were used in all calculations. The final  $R_1$  was 0.0586 ( $I > 2\sigma(I)$ ) and  $wR_2$  was 0.1851 (all data). **CCDC 2242817** deposition numbers contains the supplementary crystallographic data for this paper which can be obtained free of charge at <https://www.ccdc.cam.ac.uk/structures/>

### **References:**

- 1) C. R. Reddy, V. Ganesh and N. Punna, *J. Org. Chem.*, 2022, **87**, 11547.
- 2) Bruker (2016). APEX3, SAINT and SADABS. Bruker AXS, Inc., Madison, Wisconsin, USA.
- 3) Sheldrick G. M. (2015). *Acta Crystallogr C* 71: 3-8.
- 4) S. Chandrasekhar, B. Saritha, V. Jagadeshwar, C. Narsihmulu, D. Vijay, G. D. Sarma and B. Jagadeesh, *Tetrahedron Lett.*, 2006, **47**, 2981.

5.  $^1\text{H}$  NMR and  $^{13}\text{C}$  NMR spectral copies of compounds

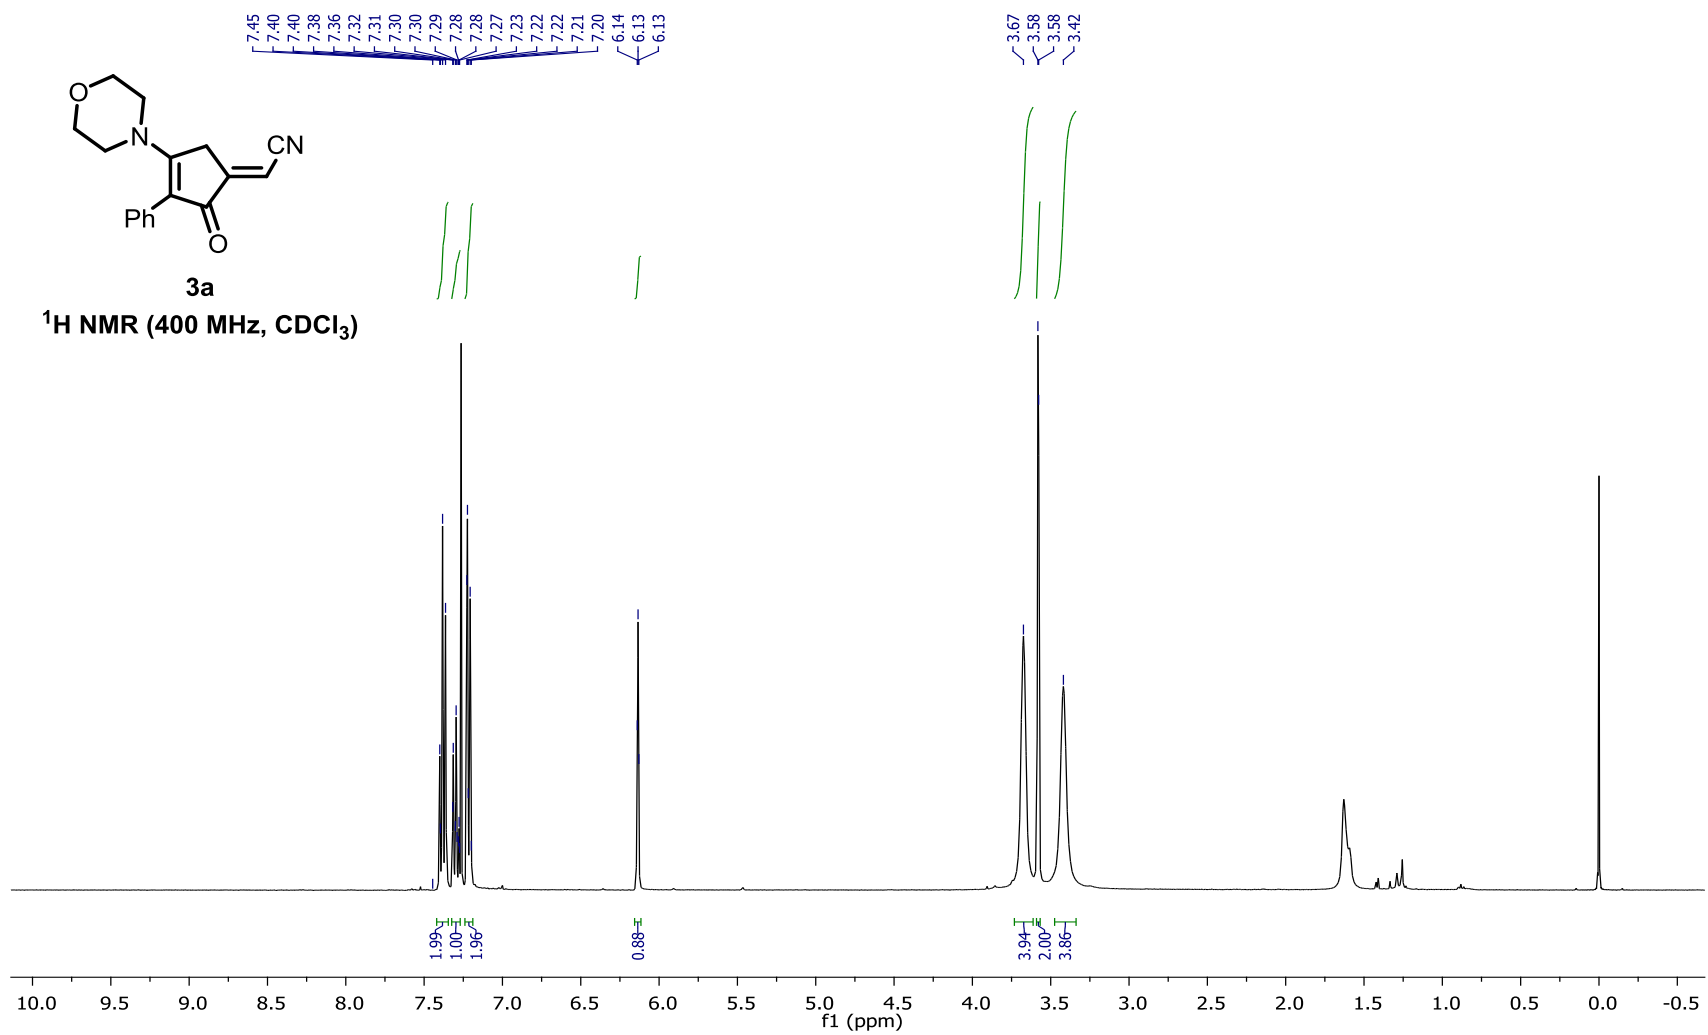

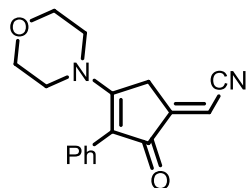

**3a**

<sup>13</sup>C NMR (100 MHz, CDCl<sub>3</sub>)

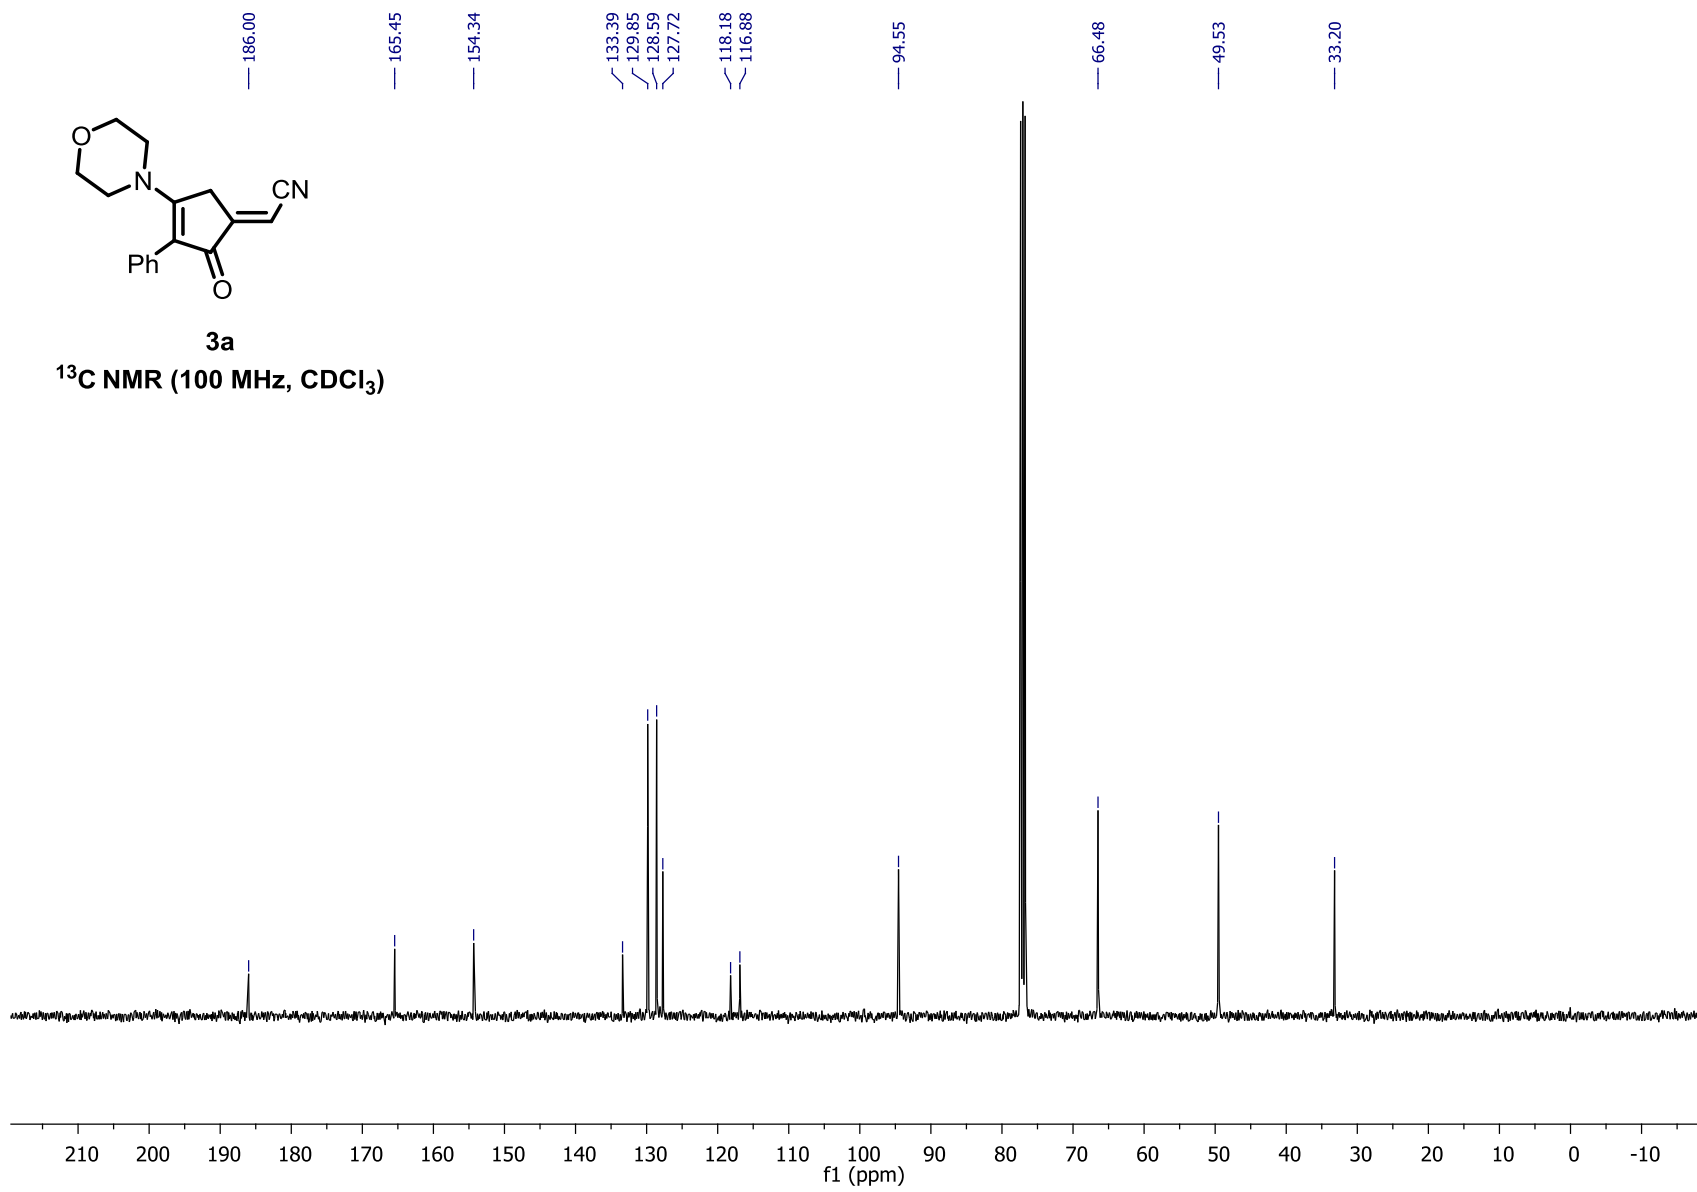

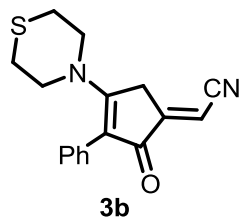

<sup>1</sup>H NMR (400 MHz, CDCl<sub>3</sub>)

7.41  
7.39  
7.37  
7.33  
7.31  
7.29  
7.21  
7.19

6.13

3.70  
3.58  
3.58

2.62

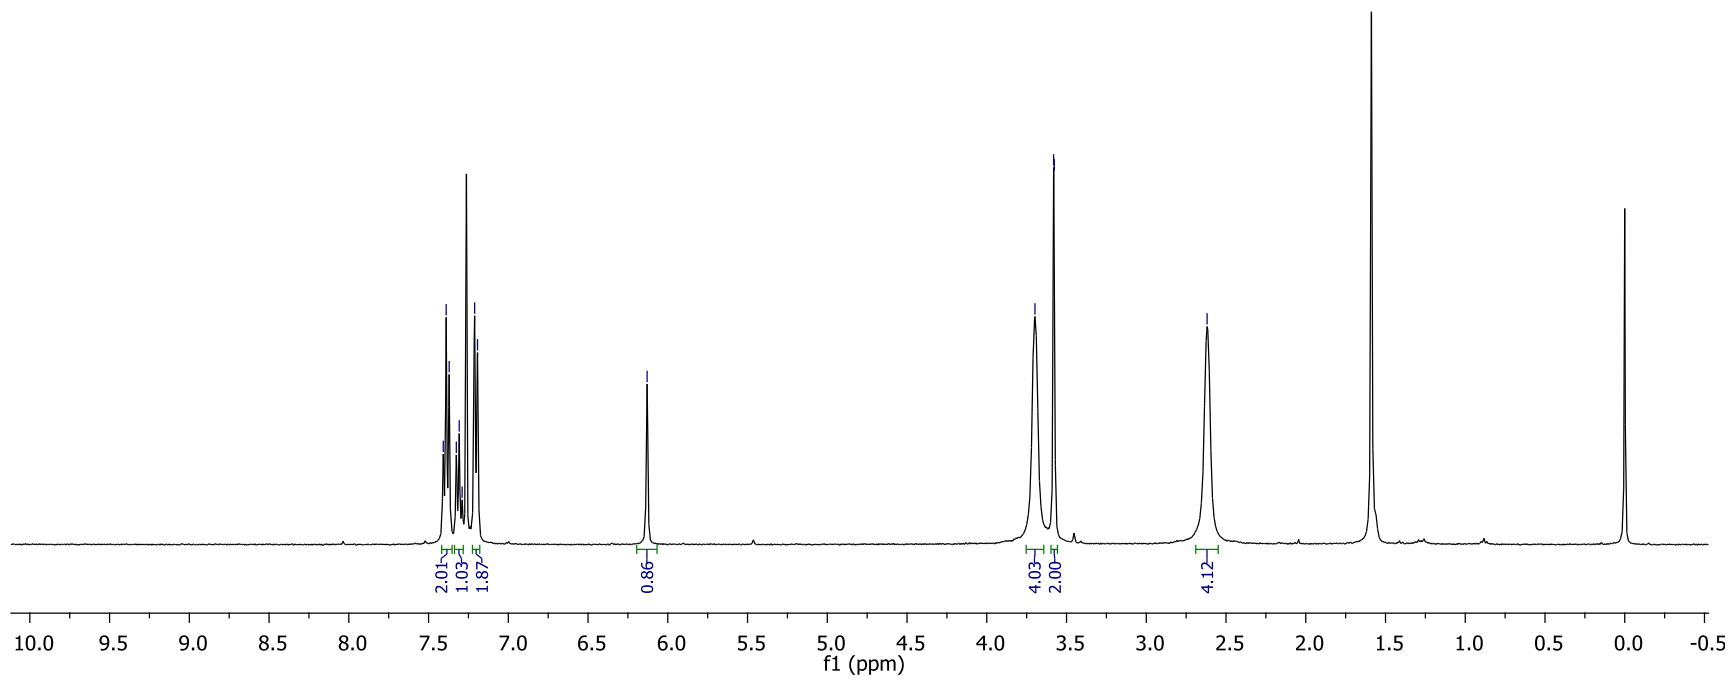

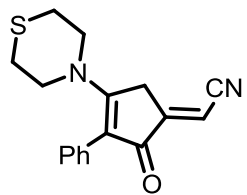

**3b**

<sup>13</sup>C NMR (100 MHz, CDCl<sub>3</sub>)

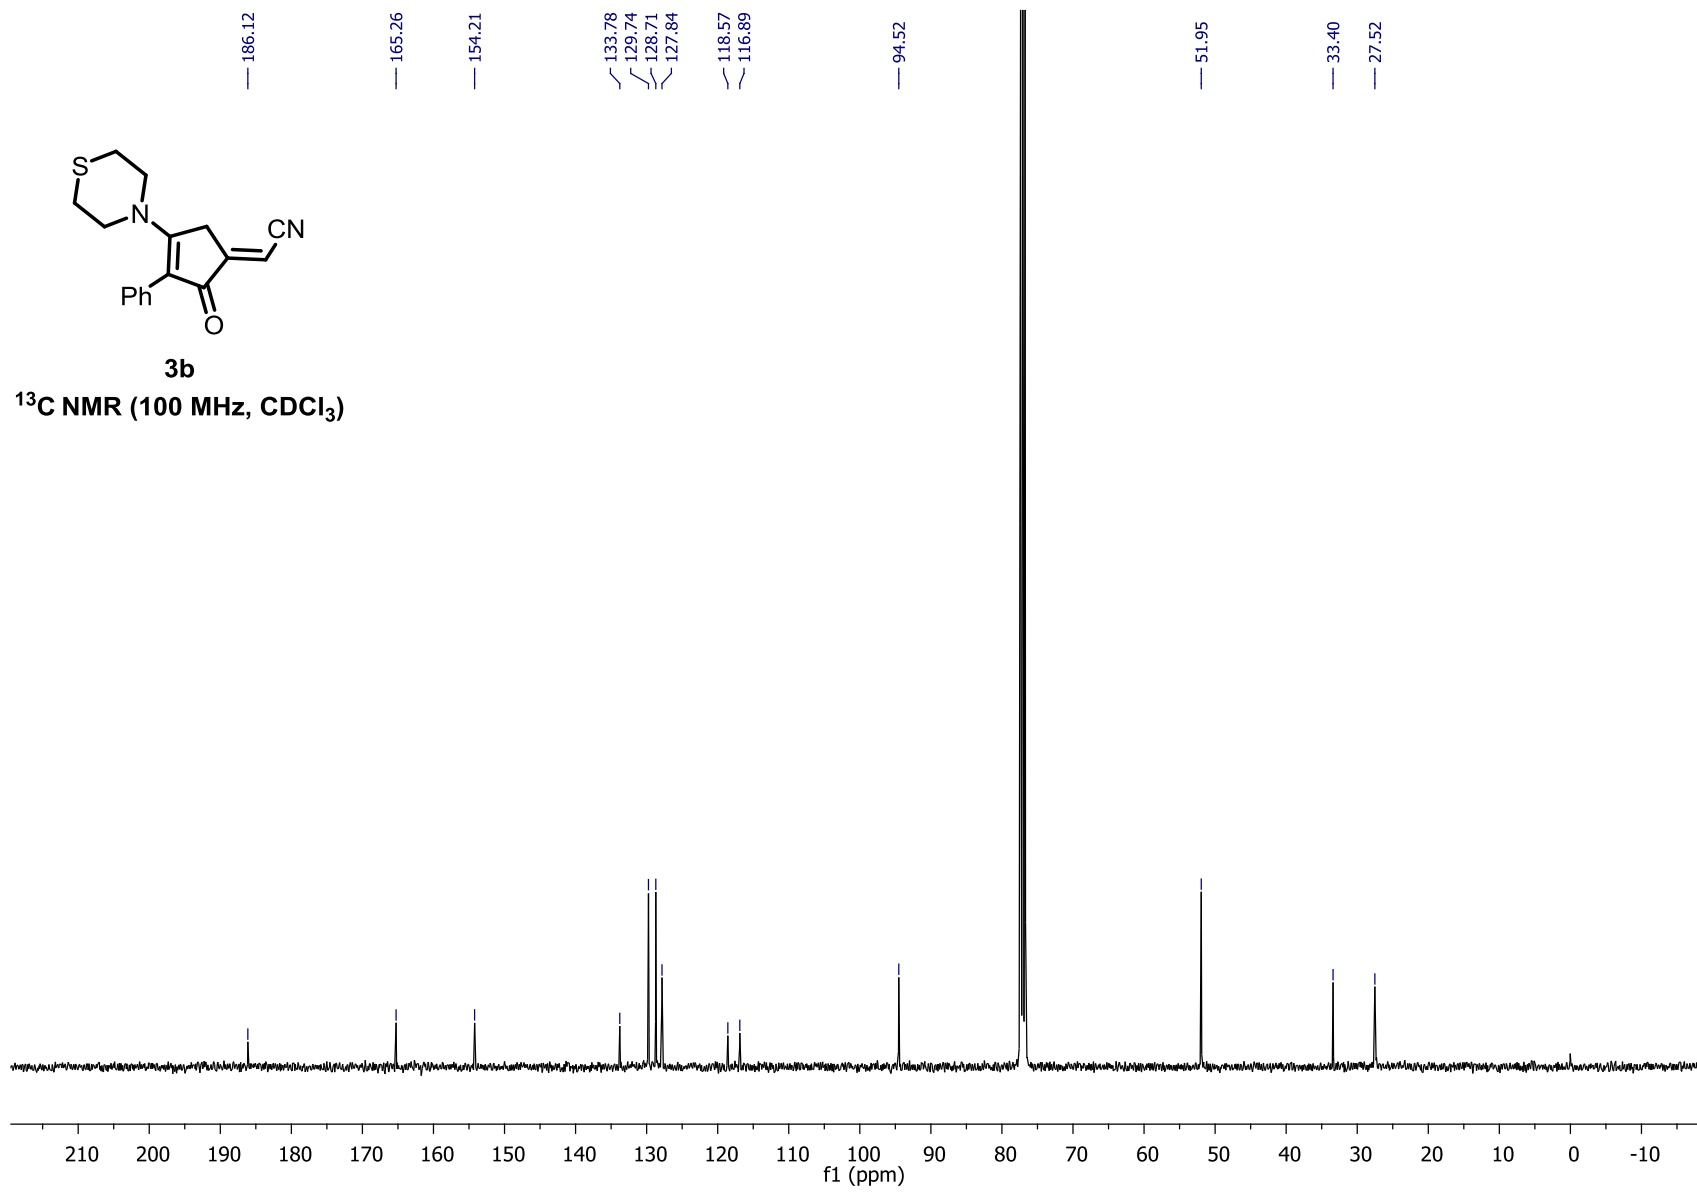

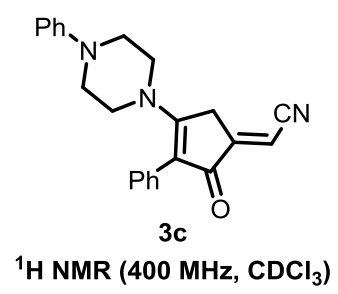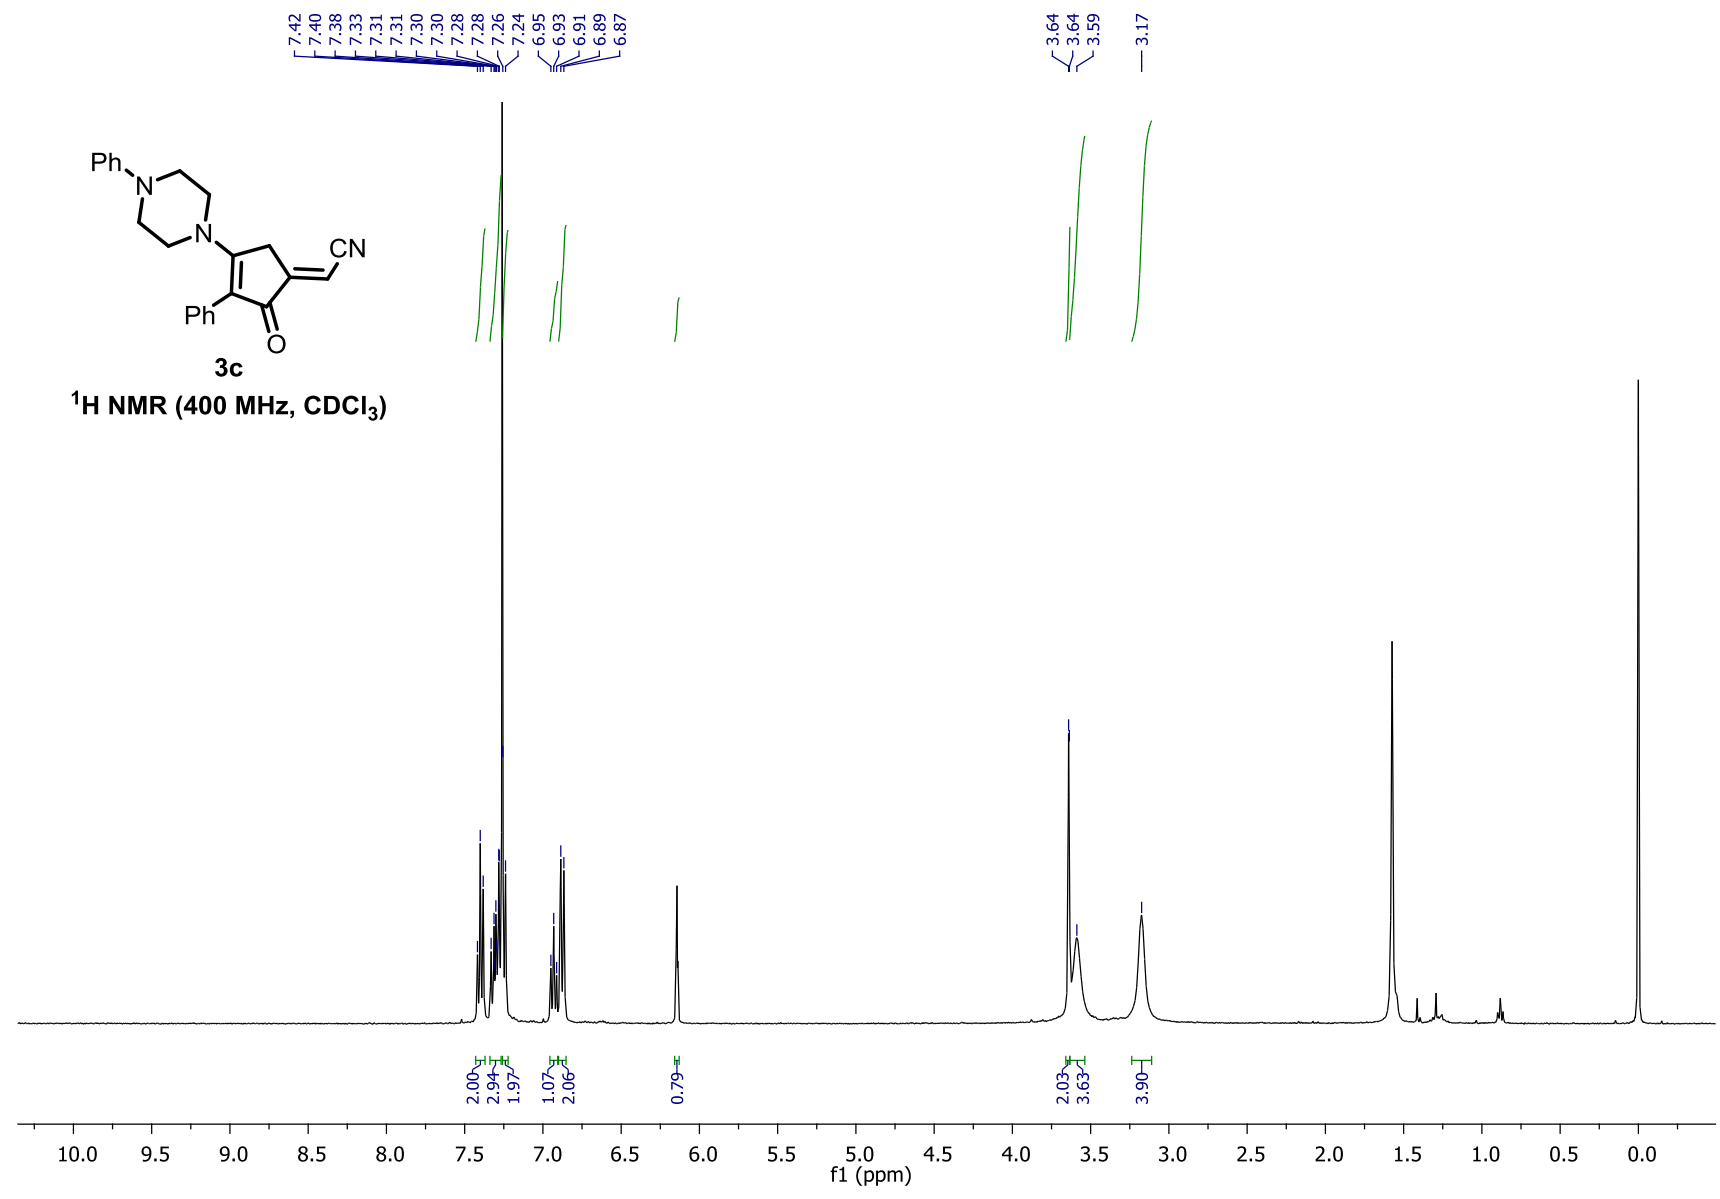

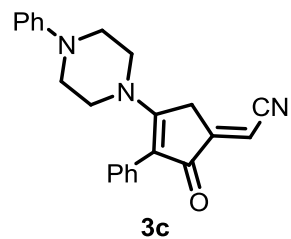

**<sup>13</sup>C NMR (100 MHz, CDCl<sub>3</sub>)**

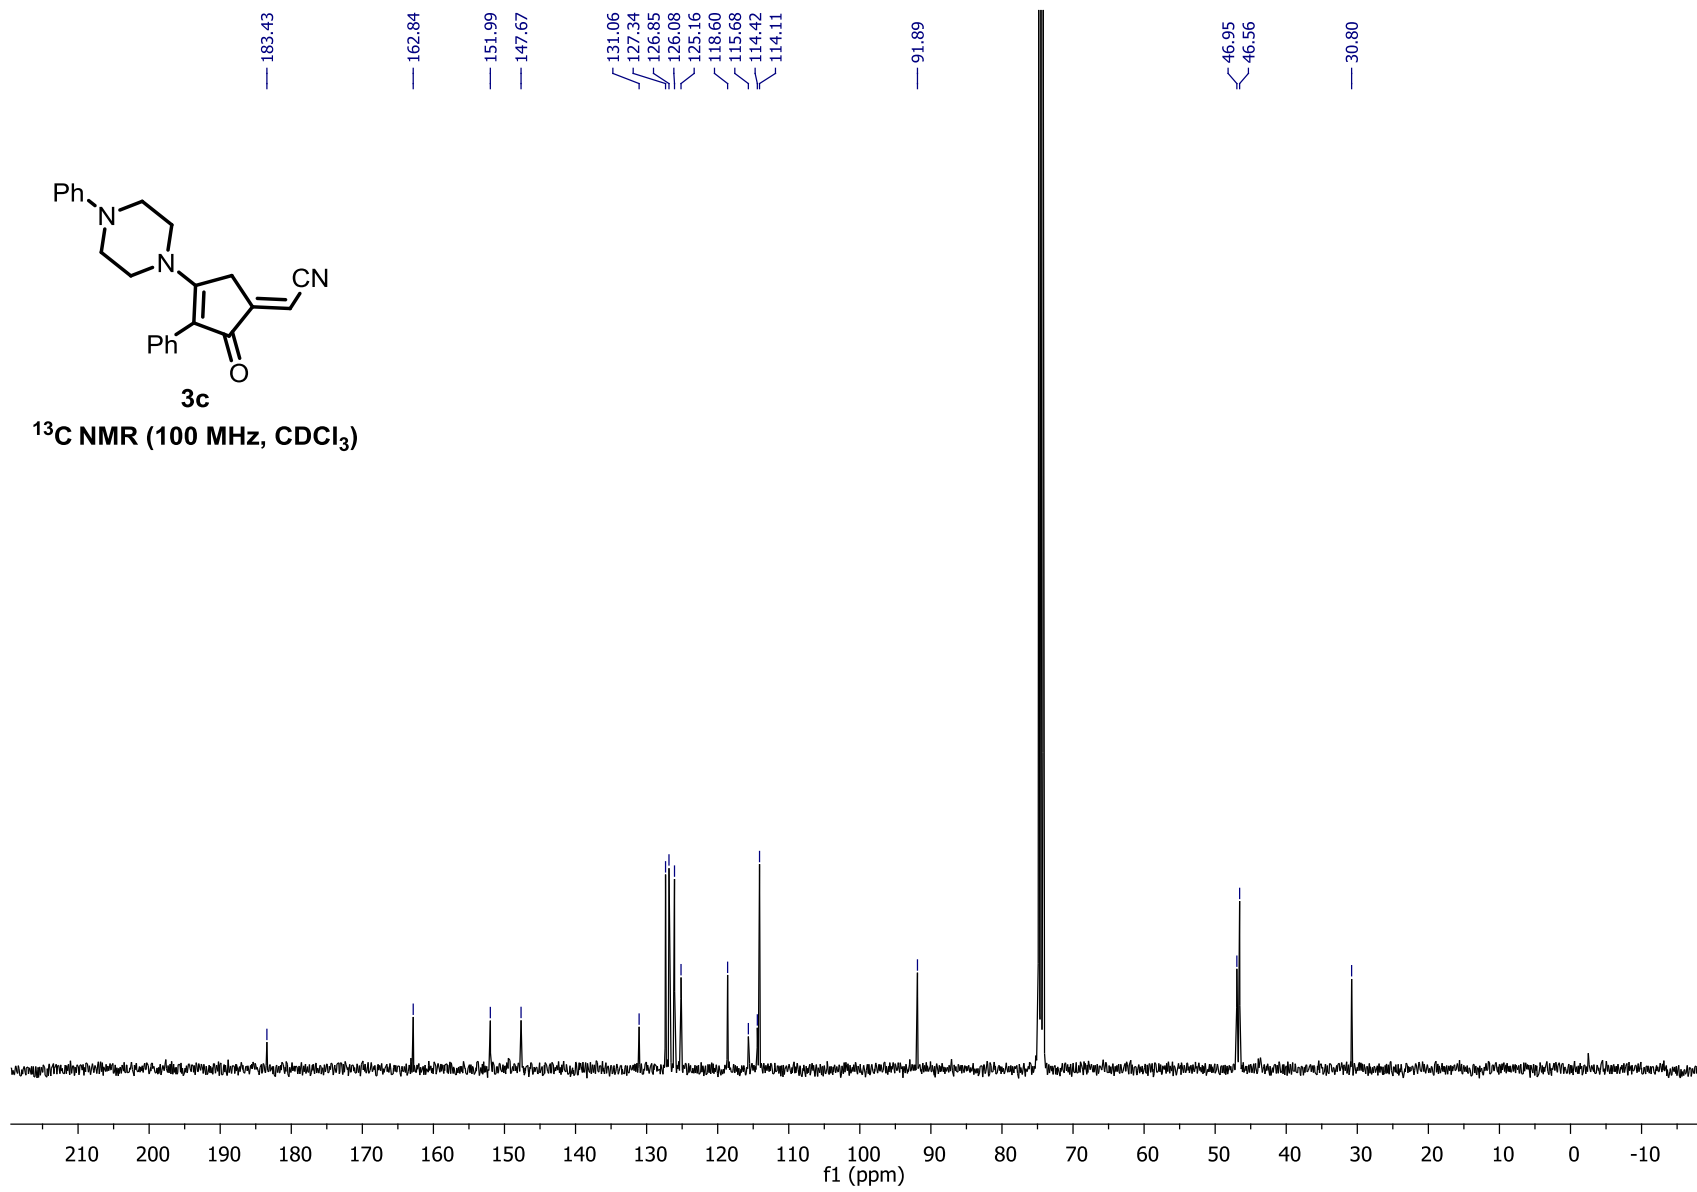

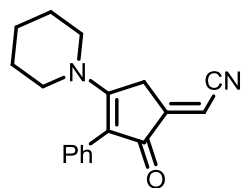

**3d**

<sup>1</sup>H NMR (400 MHz, CDCl<sub>3</sub>)

7.39  
7.37  
7.35  
7.30  
7.28  
7.27  
7.24  
7.23  
7.21

6.11  
6.10  
6.10

3.57  
3.57  
3.37

1.62

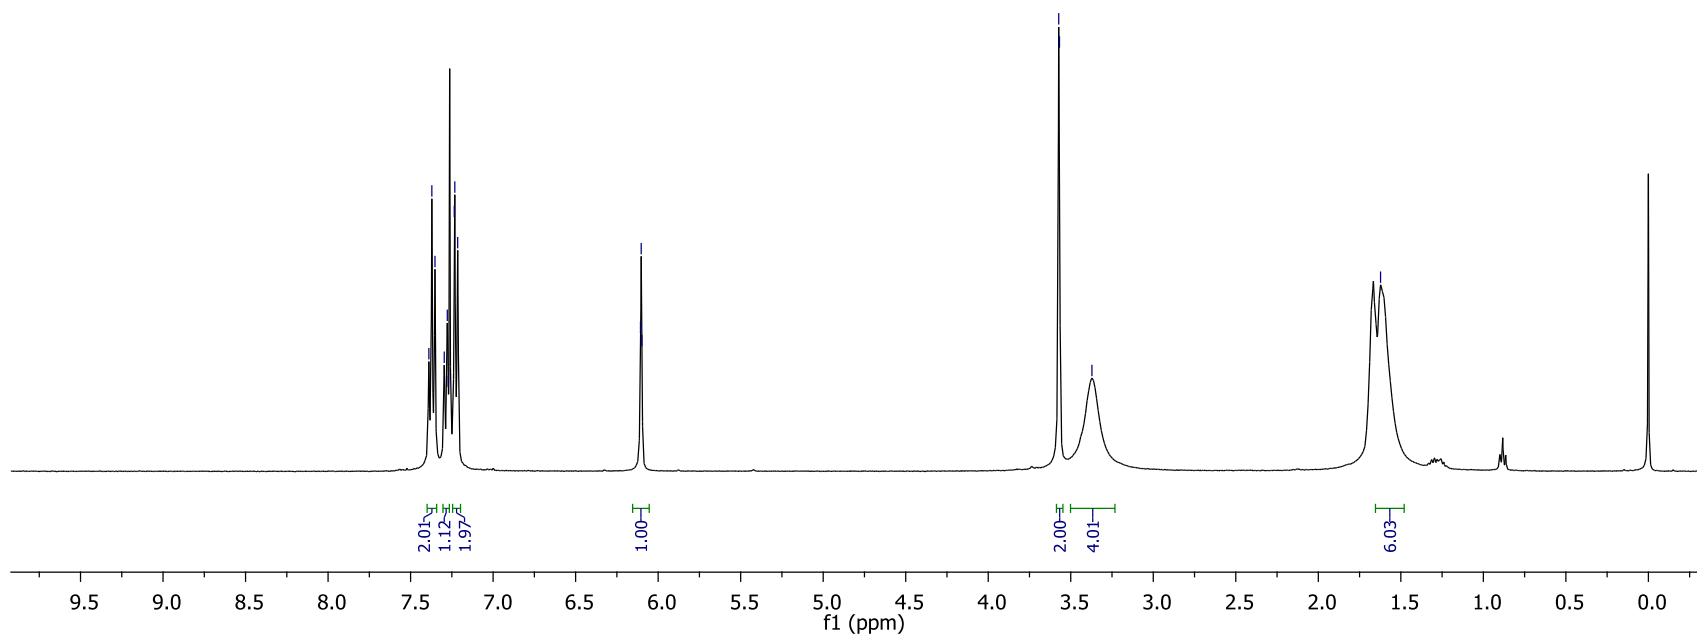



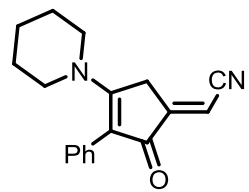

**3d**

<sup>13</sup>C NMR (100 MHz, CDCl<sub>3</sub>)

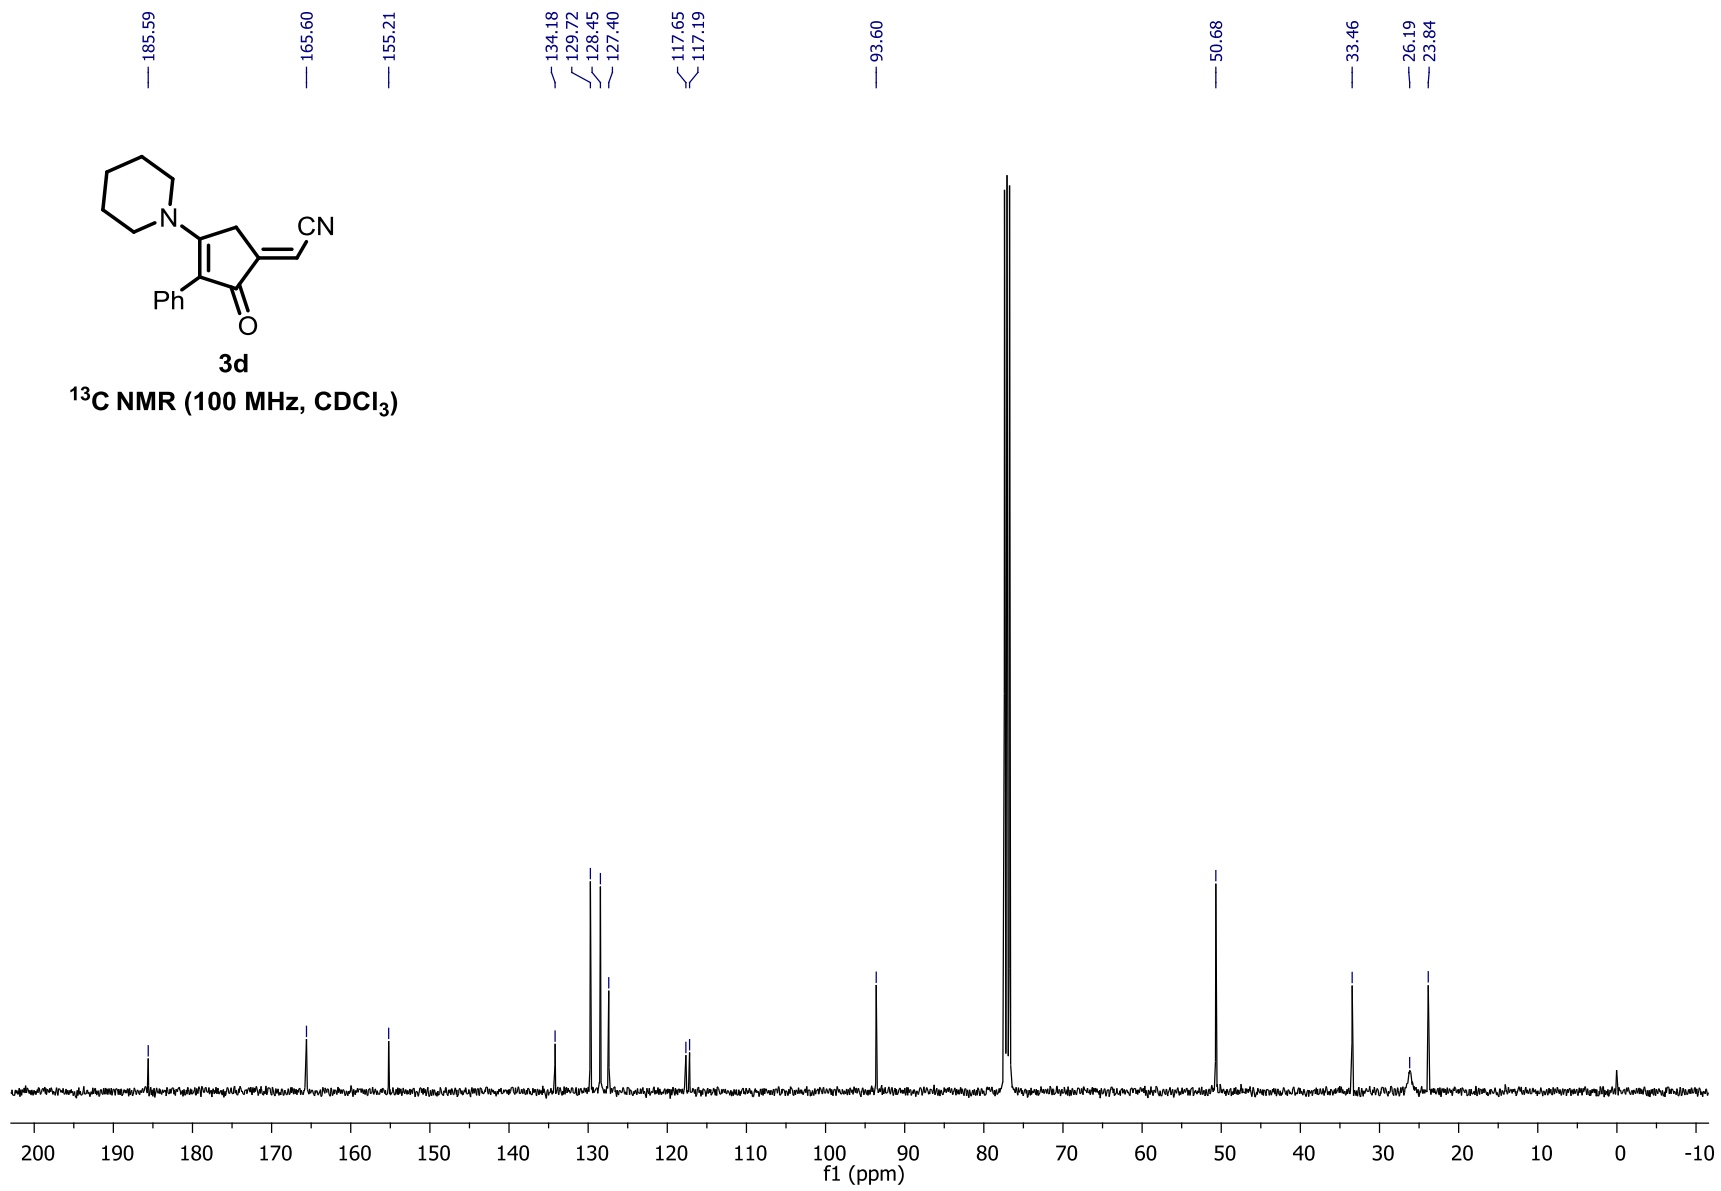

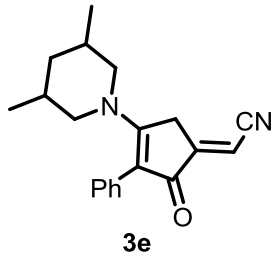

<sup>1</sup>H NMR (400 MHz, DMSO-d<sub>6</sub>)

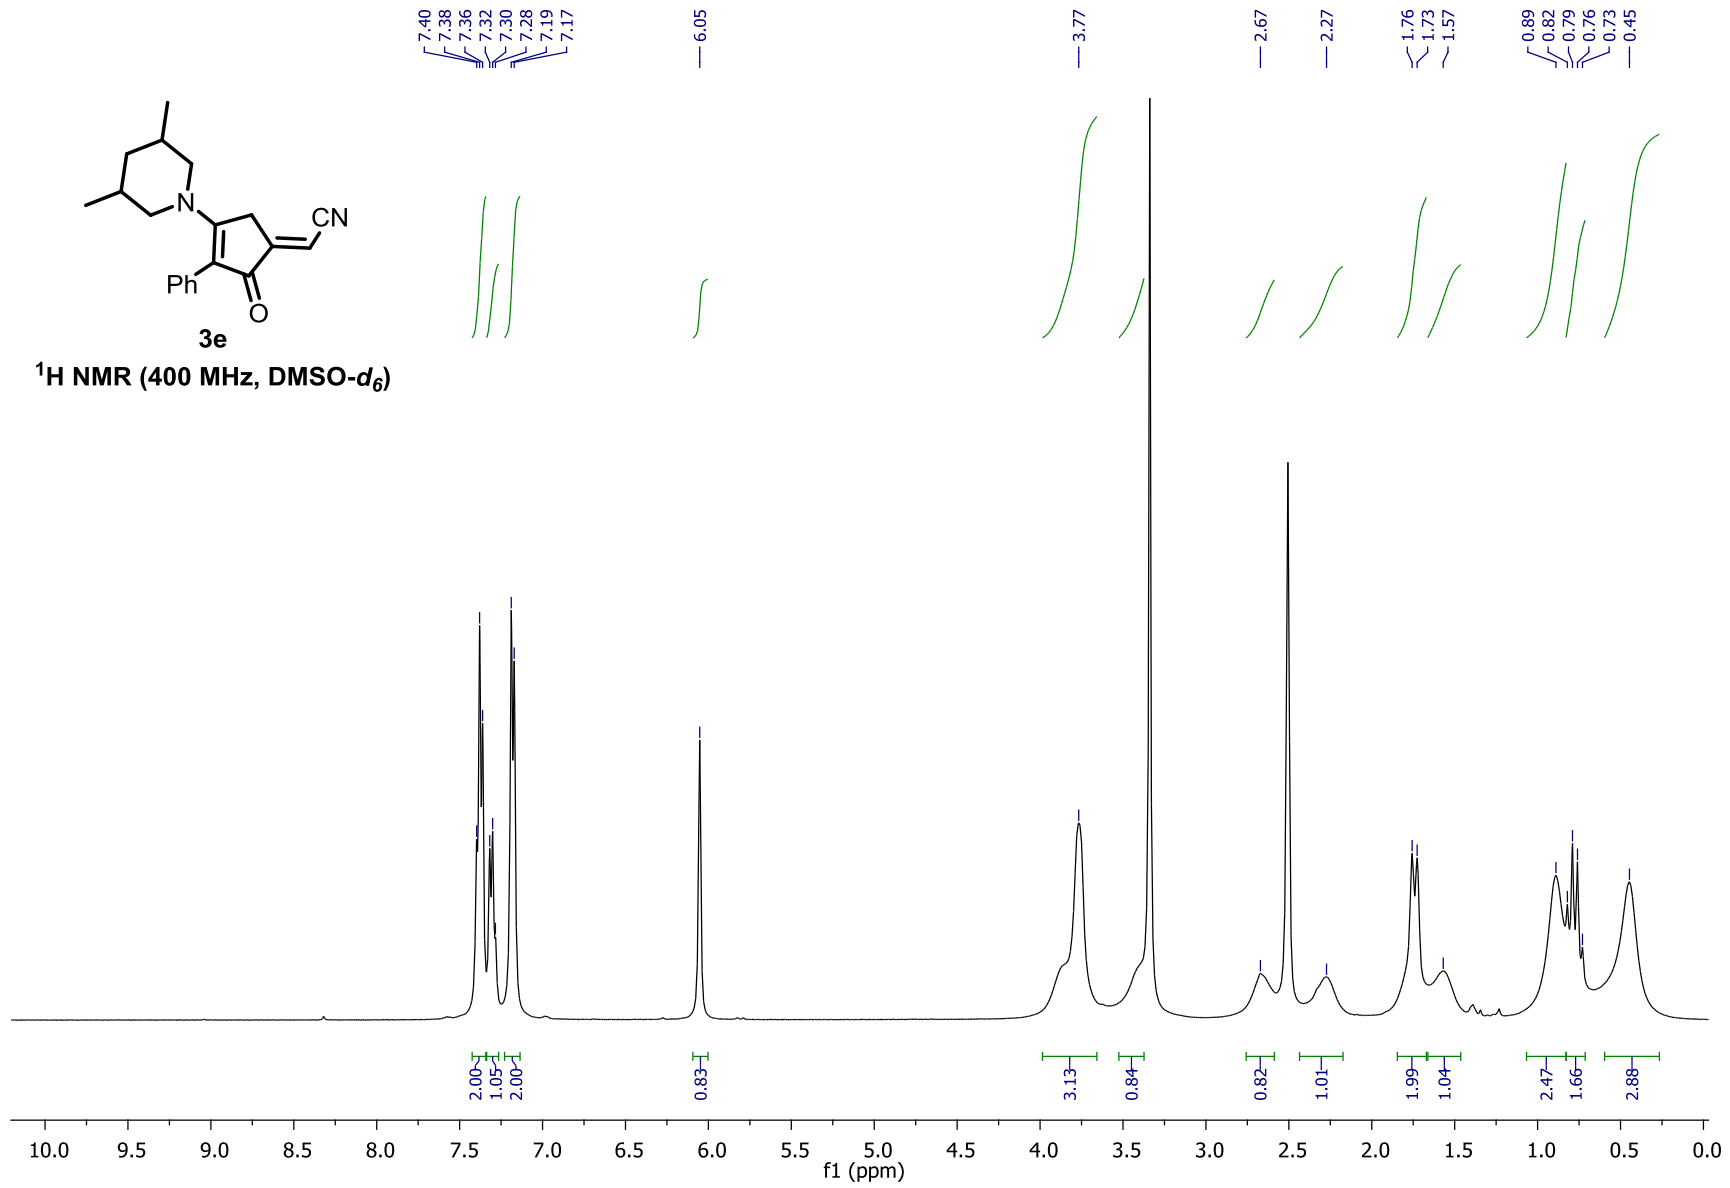

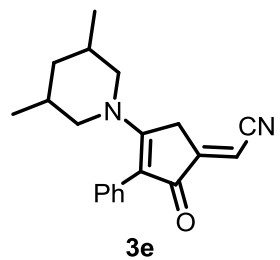

<sup>13</sup>C NMR (100 MHz, DMSO-d<sub>6</sub>)

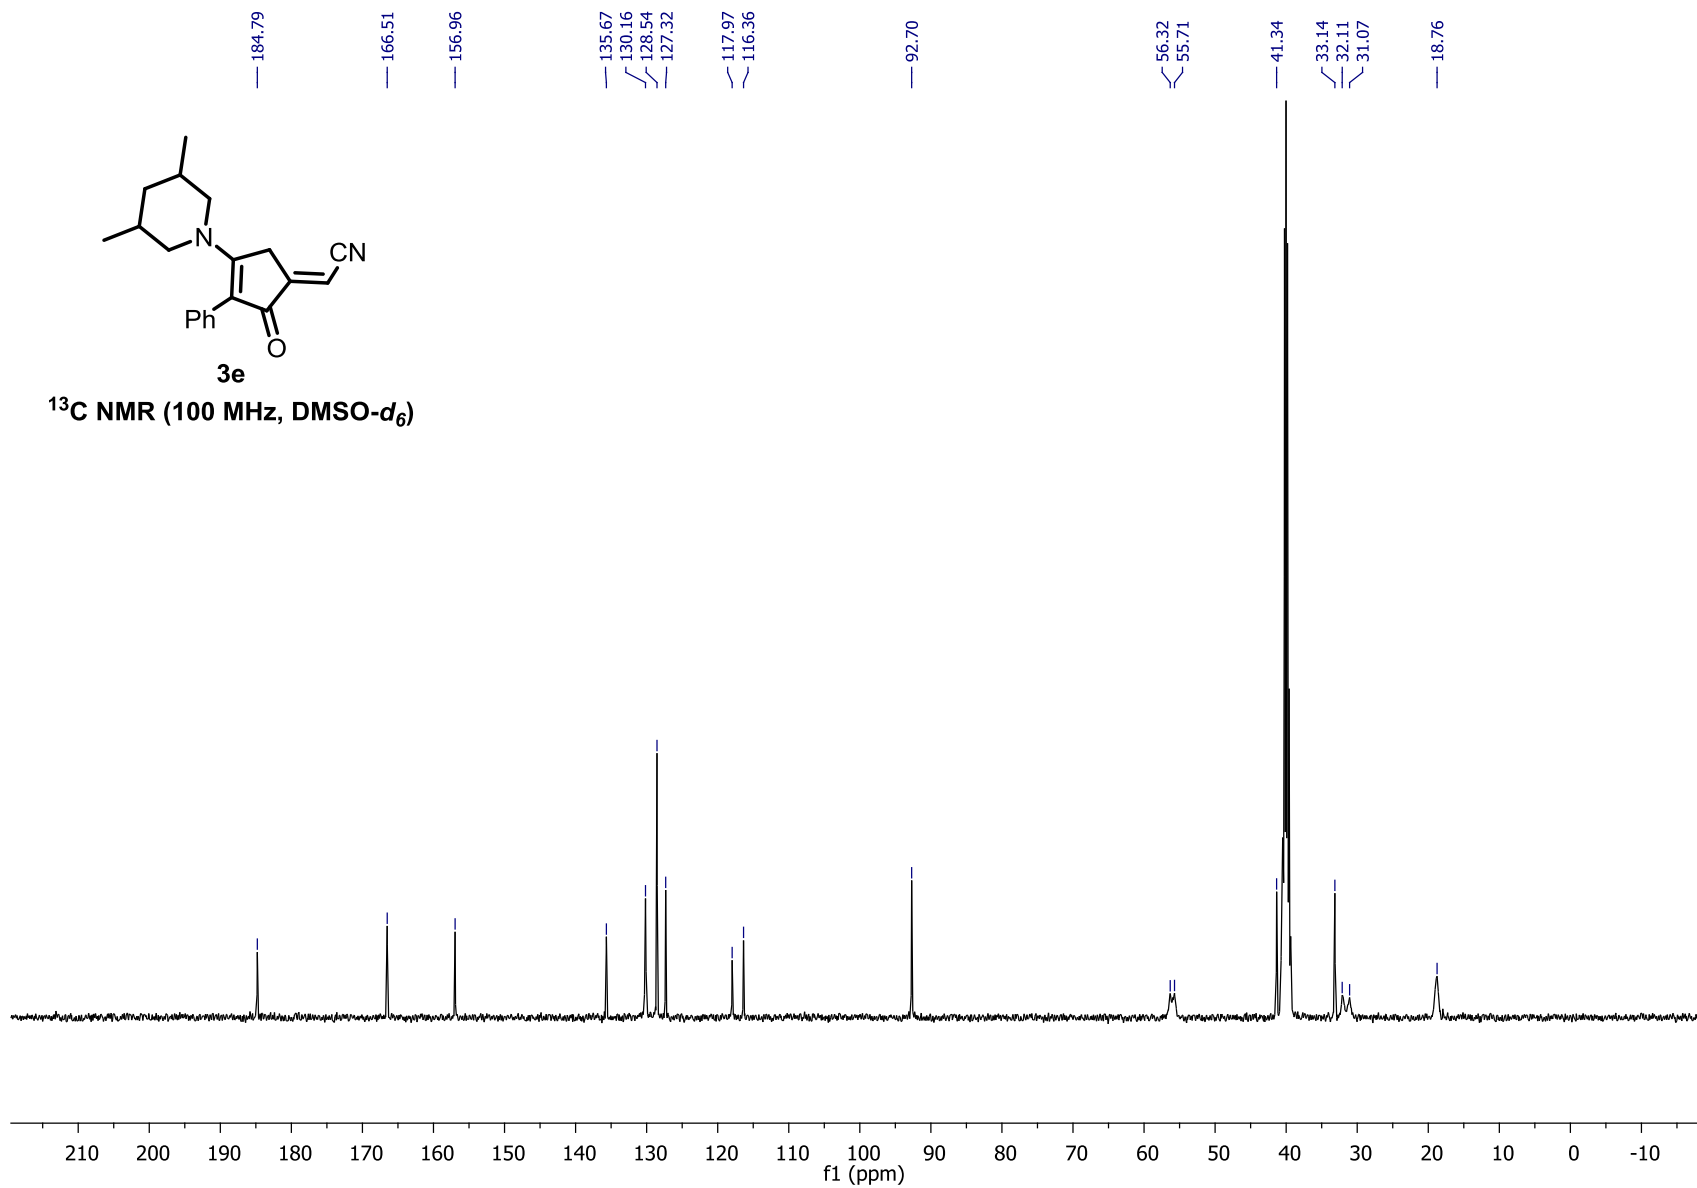

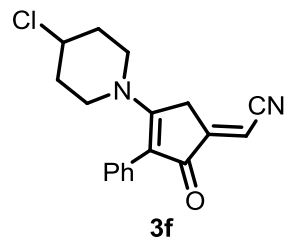

<sup>1</sup>H NMR (400 MHz, CDCl<sub>3</sub>)

7.40  
7.39  
7.37  
7.32  
7.30  
7.28  
7.22  
7.21

6.13

4.32

3.59  
3.41

2.06  
1.88

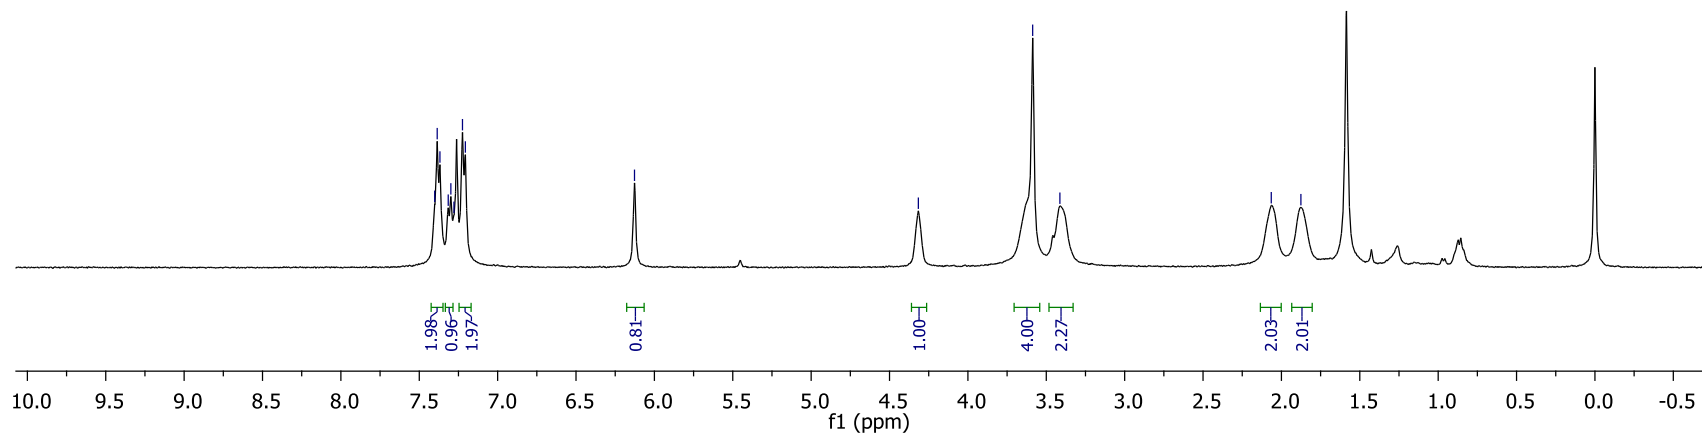

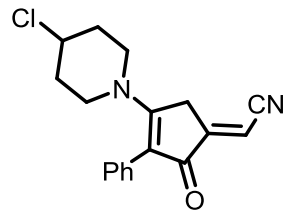

3f

<sup>13</sup>C NMR (100 MHz, CDCl<sub>3</sub>)

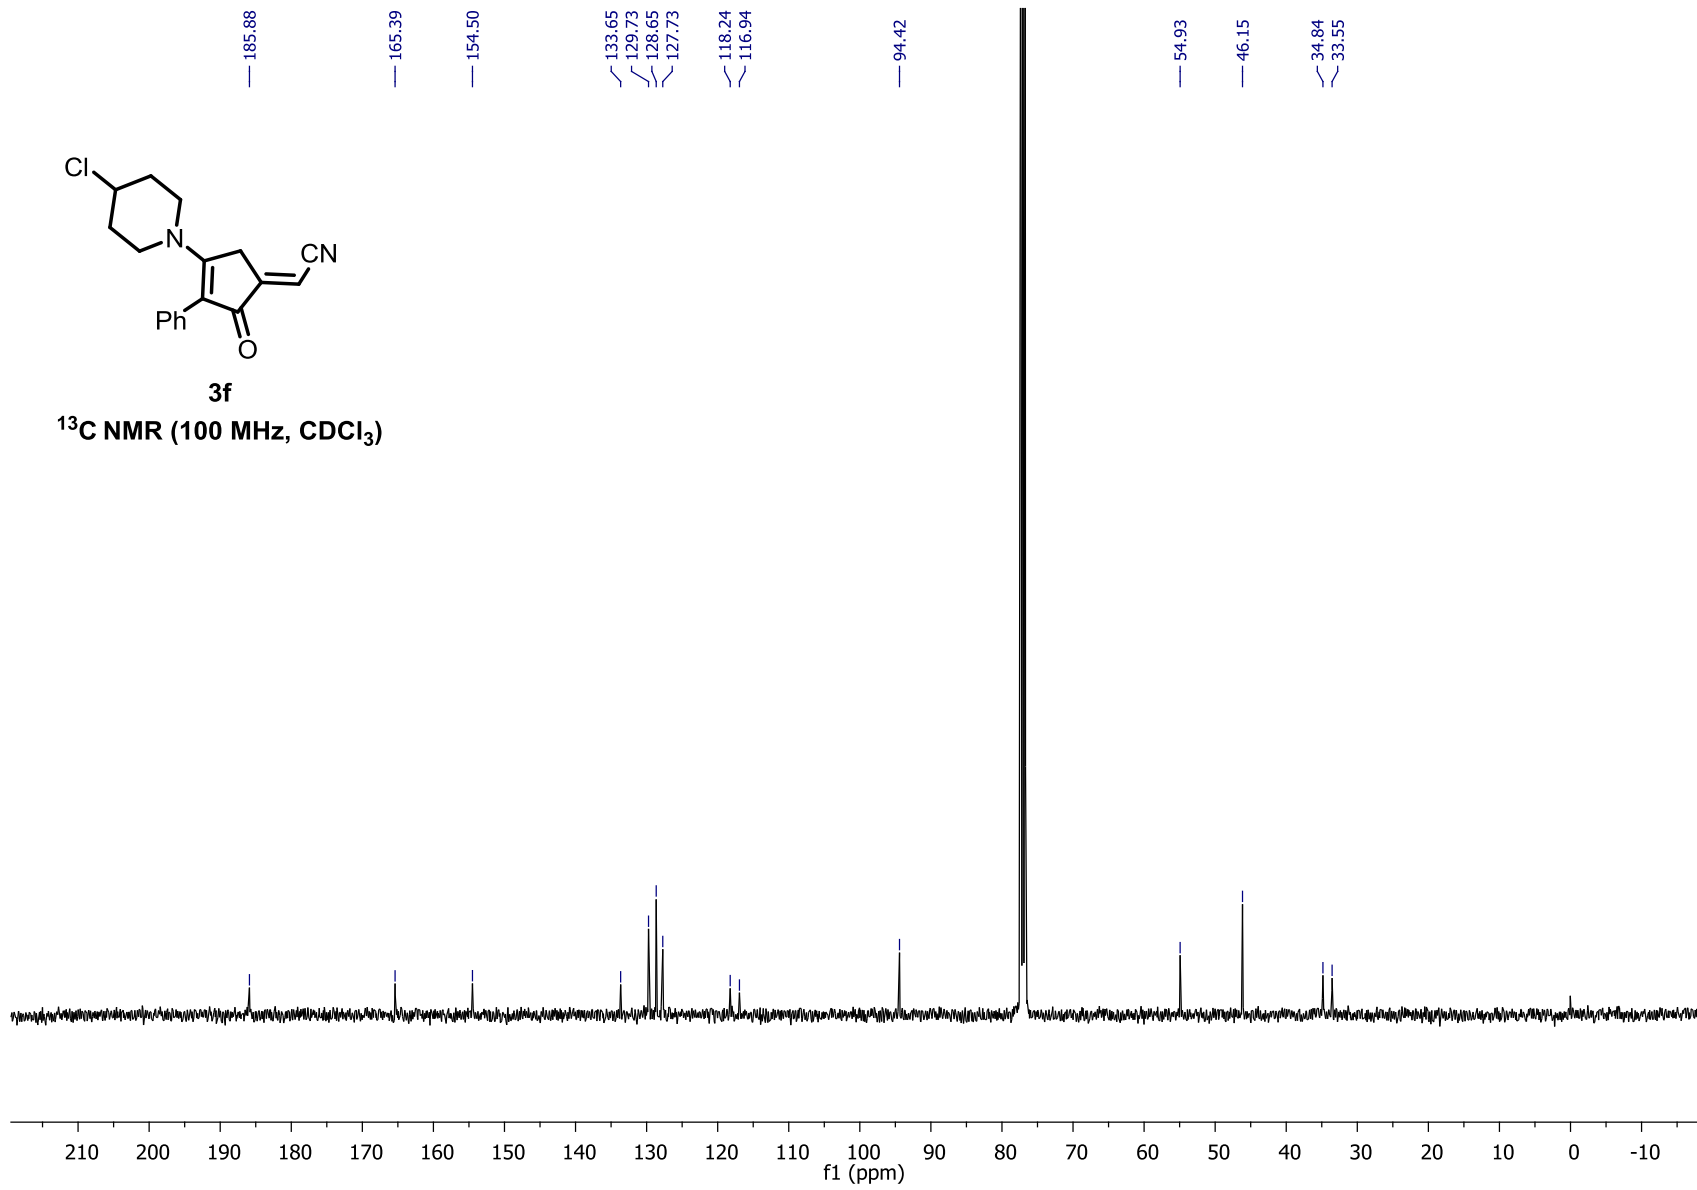

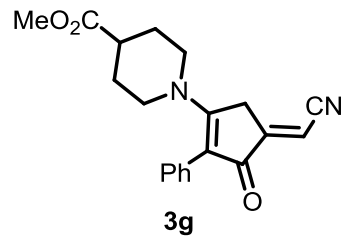

<sup>1</sup>H NMR (400 MHz, CDCl<sub>3</sub>)

7.40  
7.38  
7.36  
7.35  
7.31  
7.29  
7.25  
7.22  
7.20

6.12

3.74  
3.70  
3.58  
3.57

3.09

2.62  
2.60  
2.59  
2.58  
2.57

1.90  
1.76

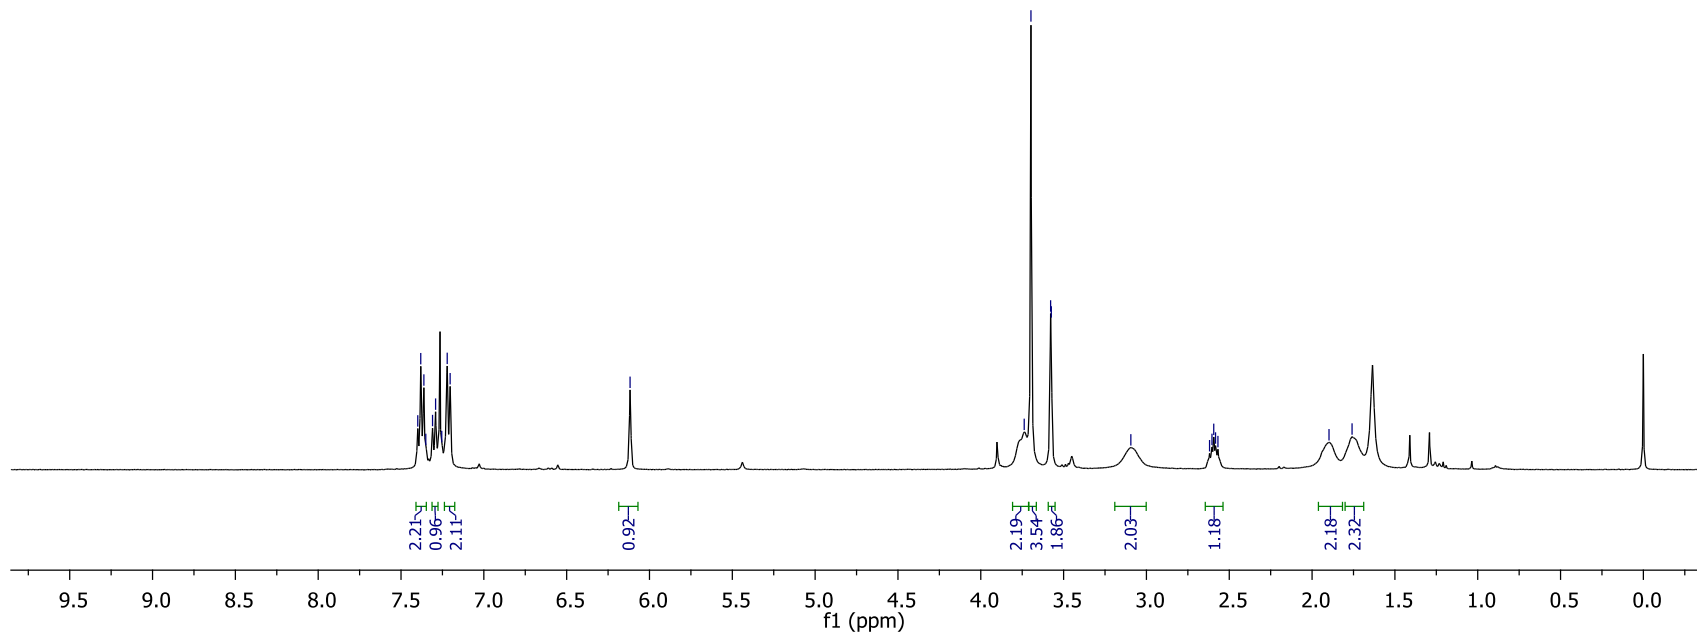

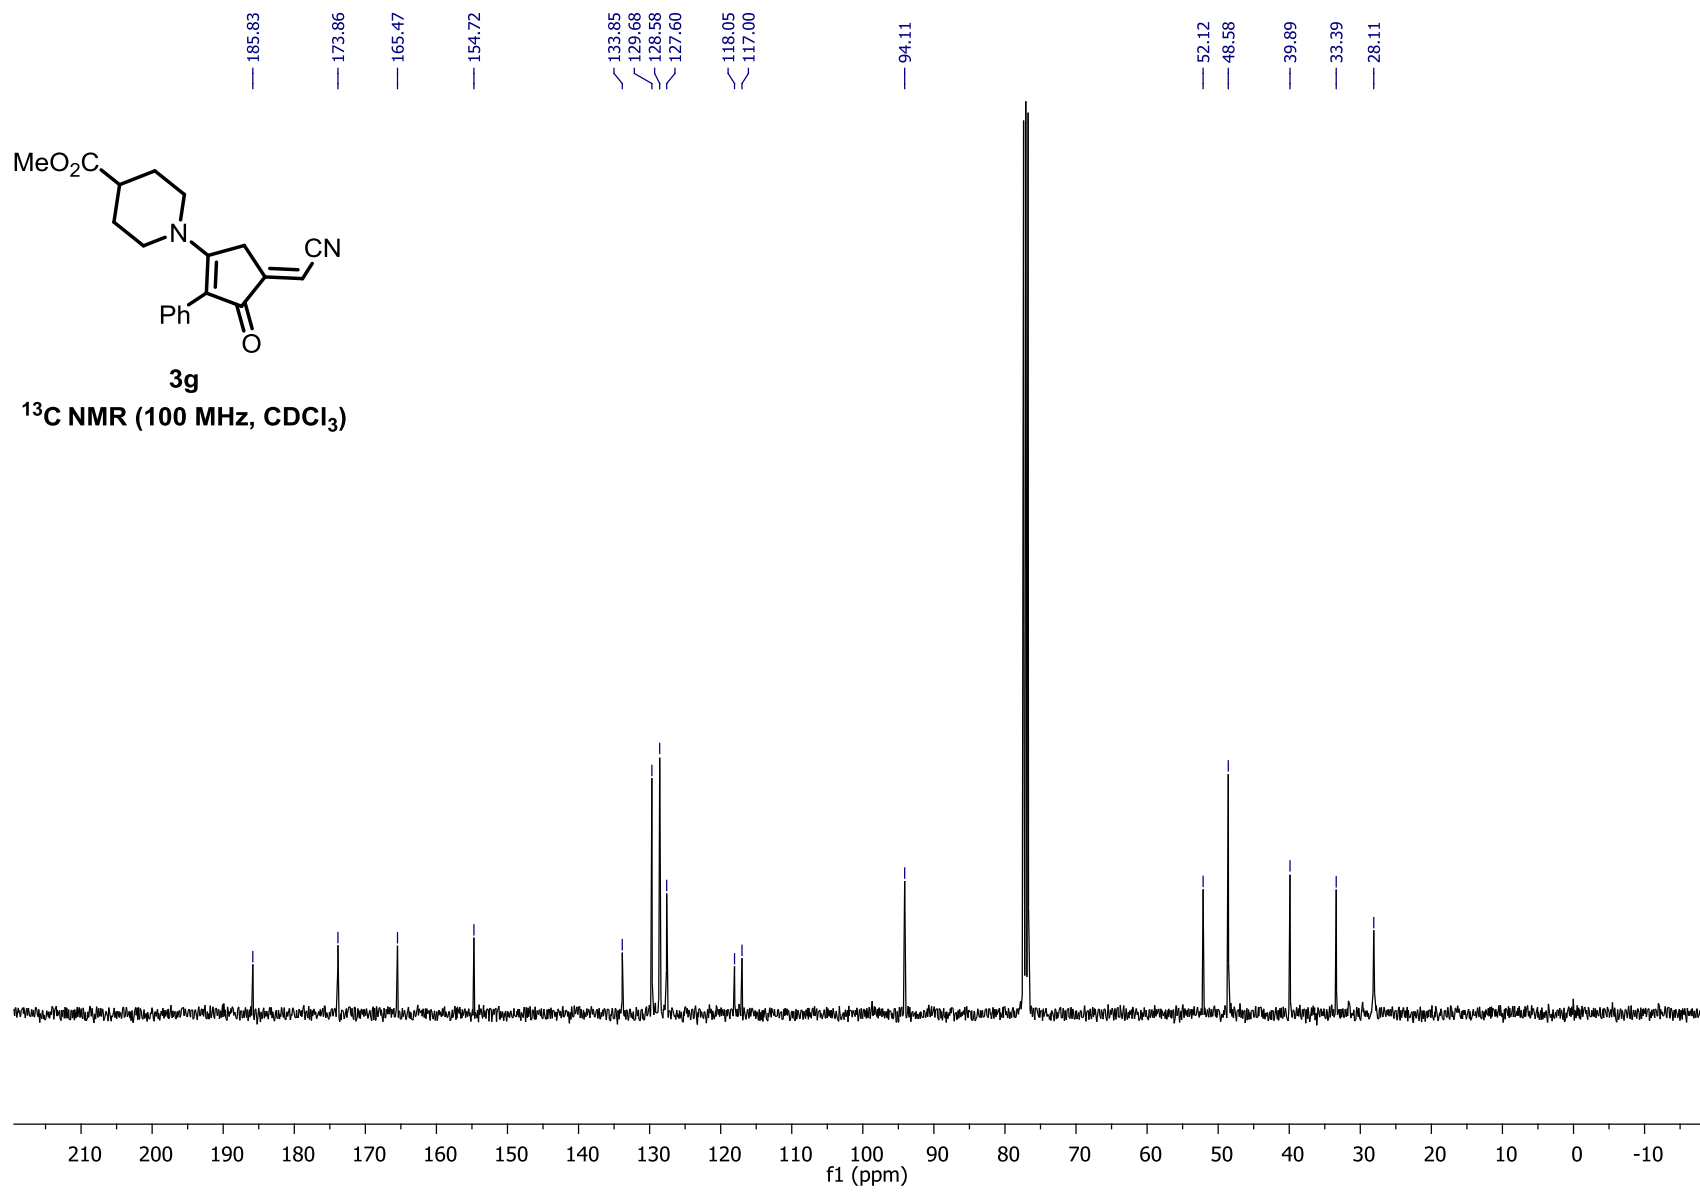

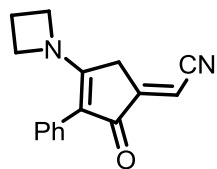

3h

<sup>1</sup>H NMR (500 MHz, CDCl<sub>3</sub>)

7.36  
7.36  
7.34  
7.33  
7.28  
7.27  
7.26  
7.25  
7.24  
7.22

6.13  
6.12  
6.12

4.37  
4.36  
4.34

3.84  
3.83  
3.81

3.38  
3.38

2.42  
2.41  
2.39  
2.38  
2.36

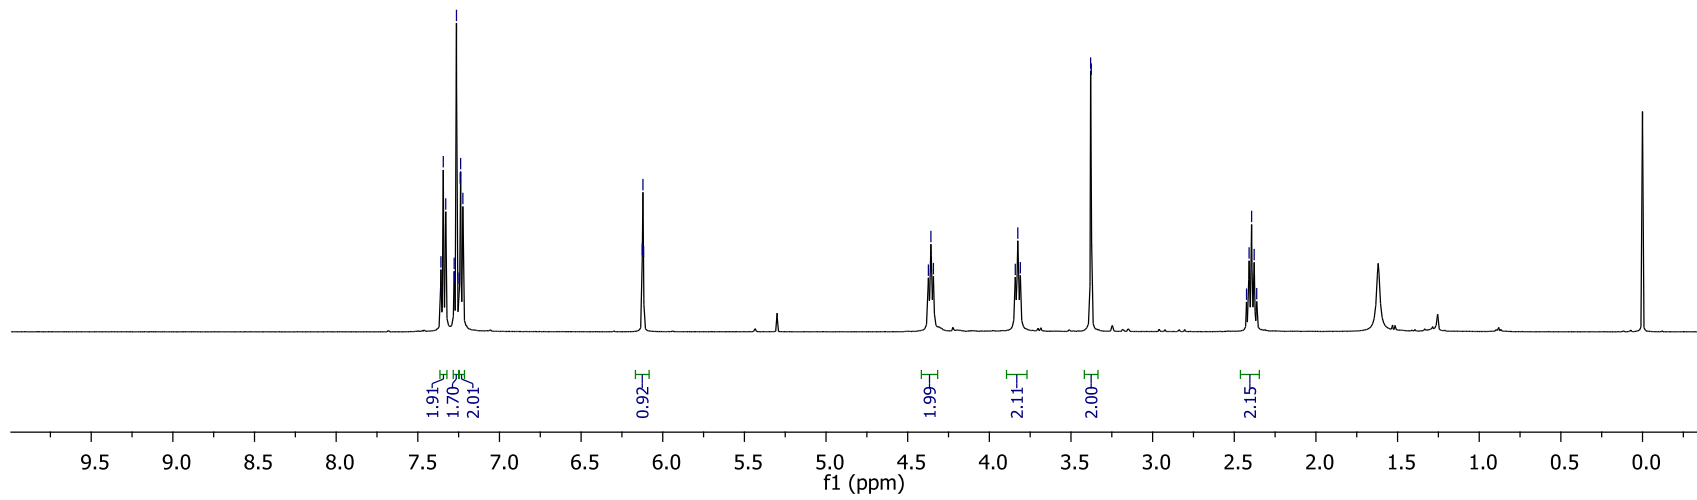



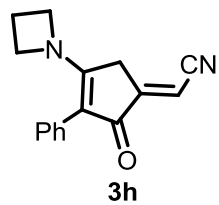

<sup>13</sup>C NMR (125 MHz, CDCl<sub>3</sub>)

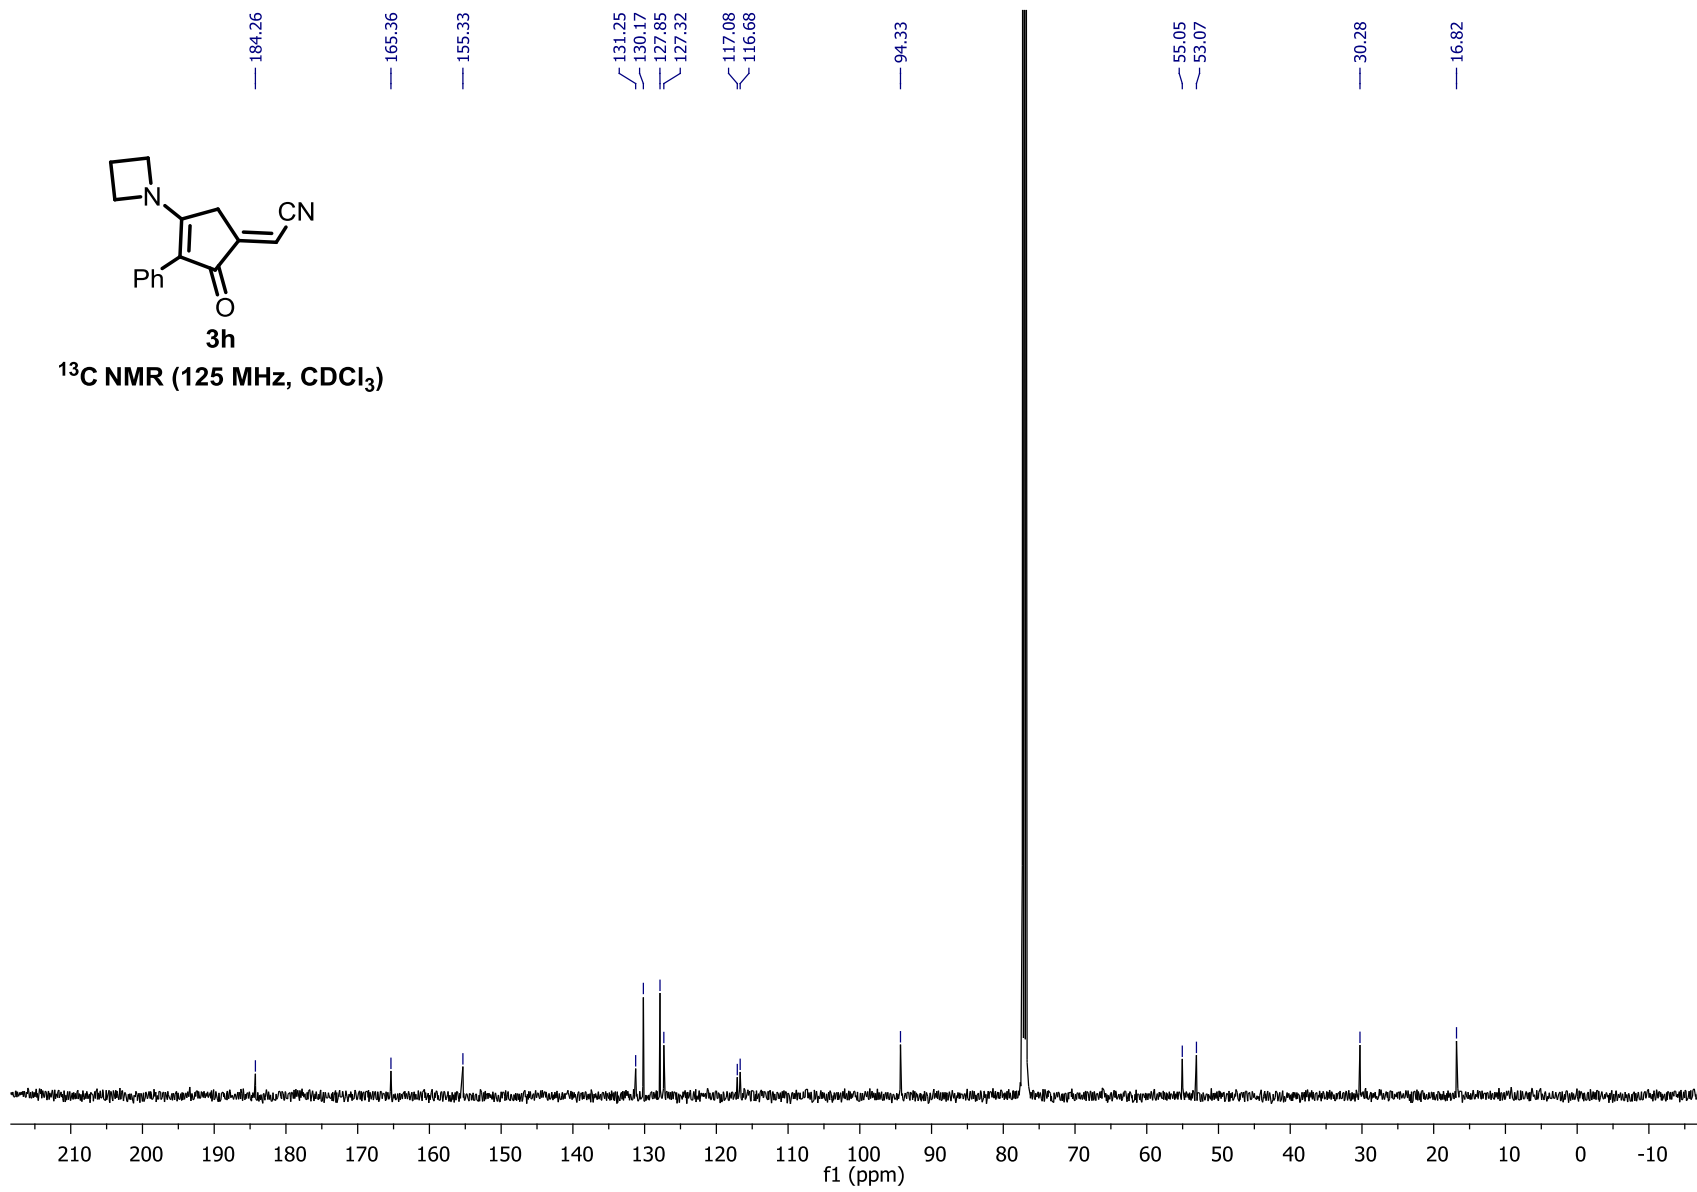

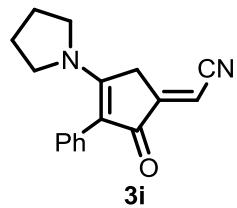

<sup>1</sup>H NMR (400 MHz, CDCl<sub>3</sub>)

7.36  
7.34  
7.32  
7.30  
7.28  
7.22  
7.20

6.12

3.69  
3.68  
3.66  
3.60

3.02  
3.01  
2.99

1.98  
1.96  
1.95  
1.85  
1.83  
1.82

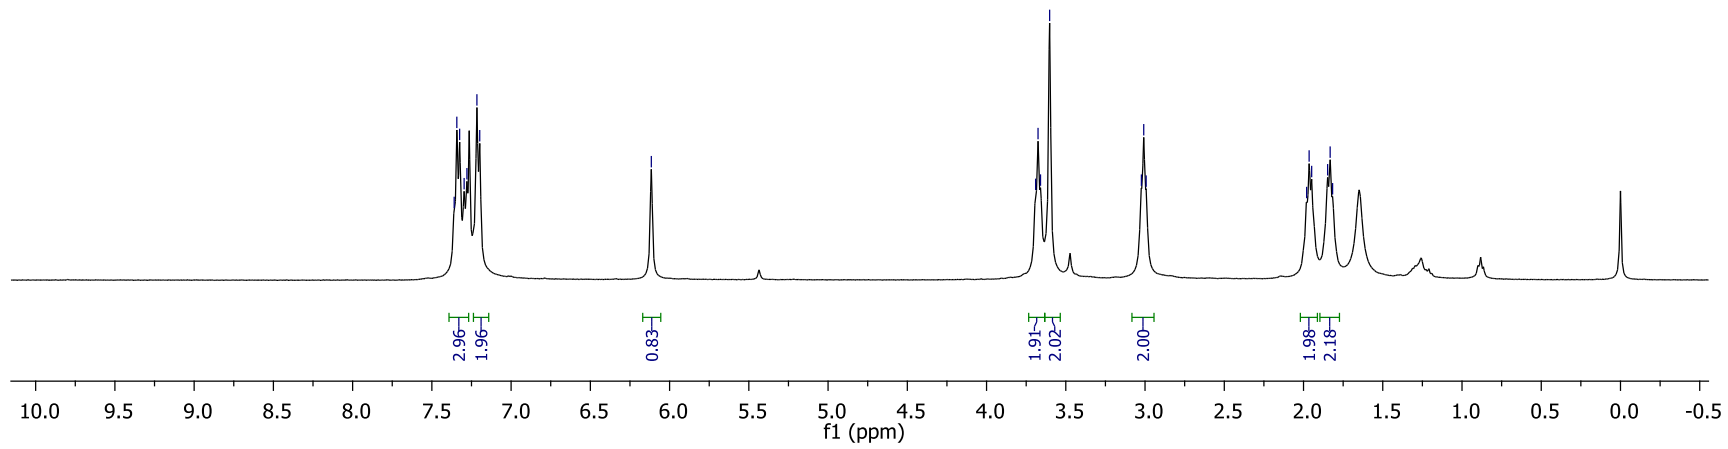

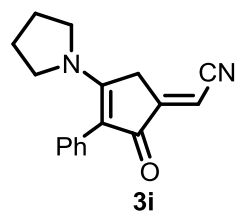

<sup>13</sup>C NMR (100 MHz, CDCl<sub>3</sub>)

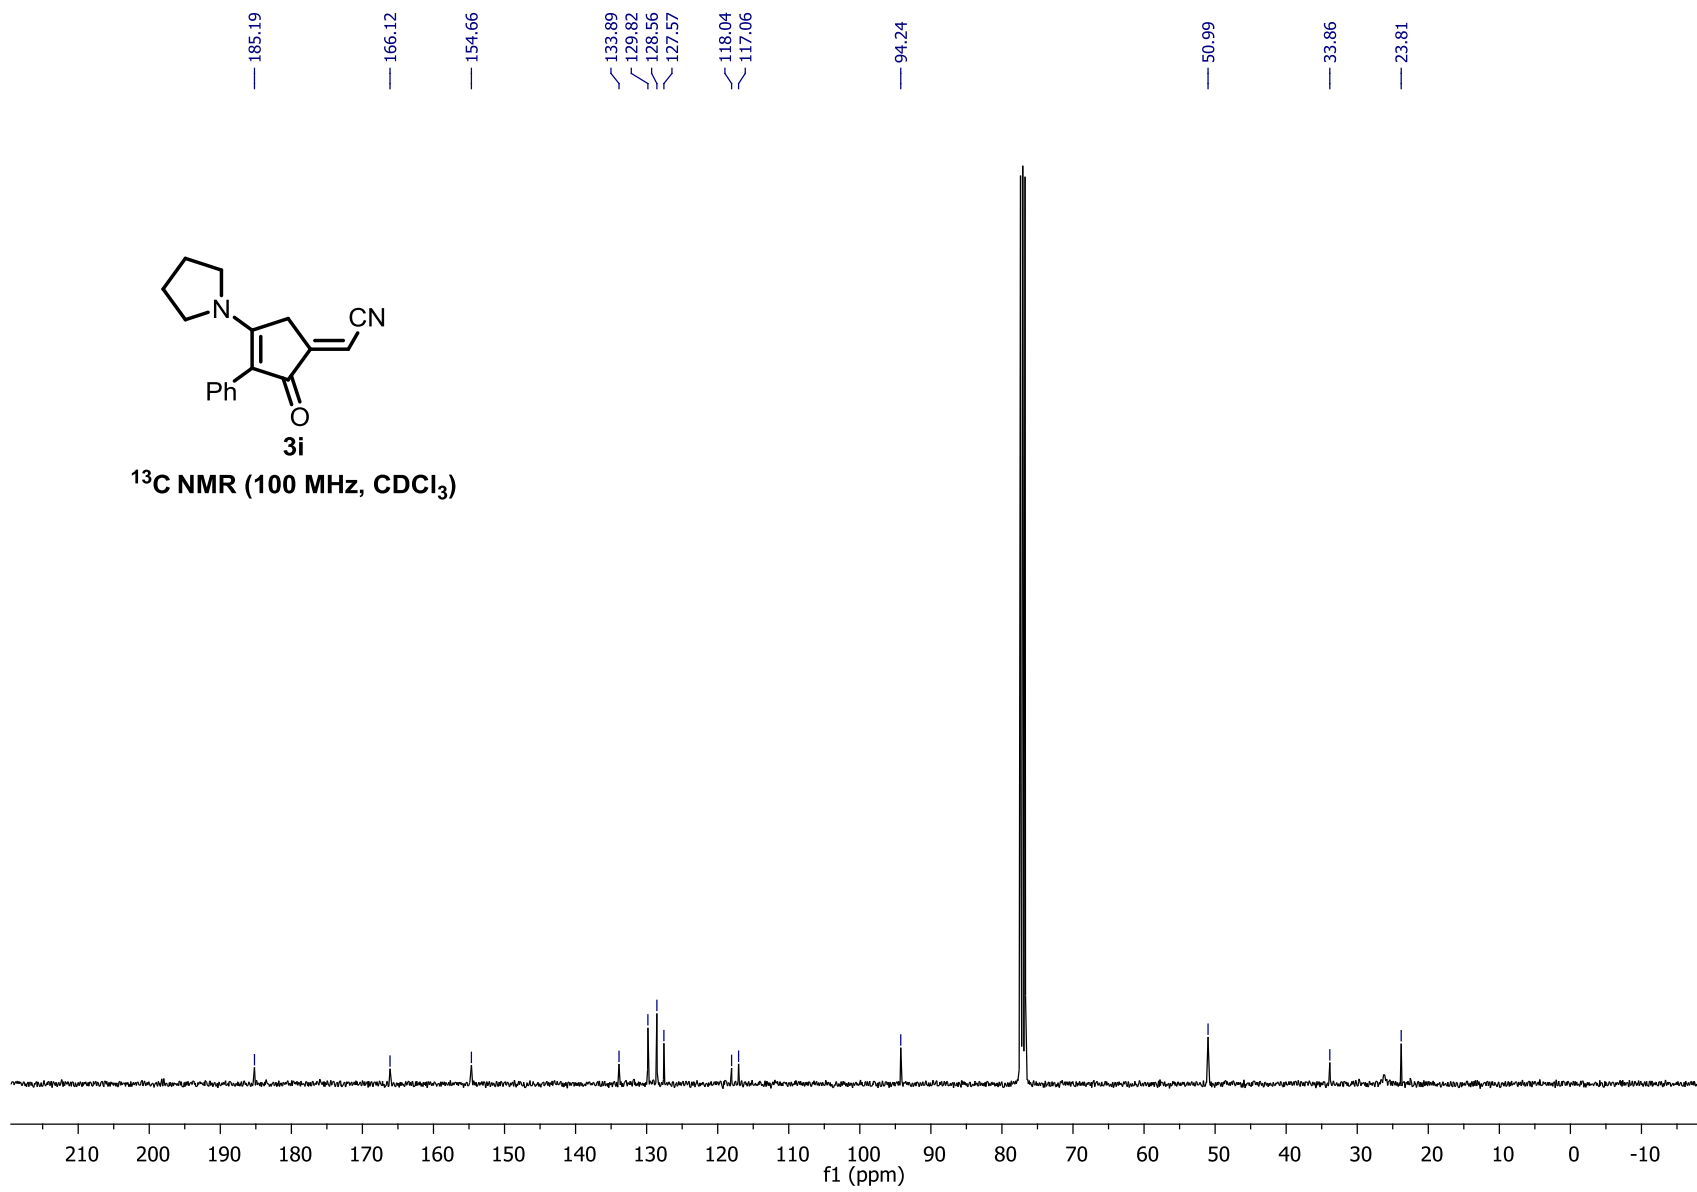

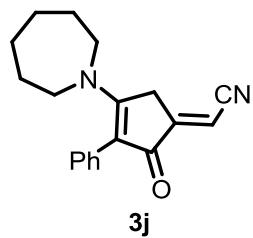

3j

<sup>1</sup>H NMR (500 MHz, CDCl<sub>3</sub>)

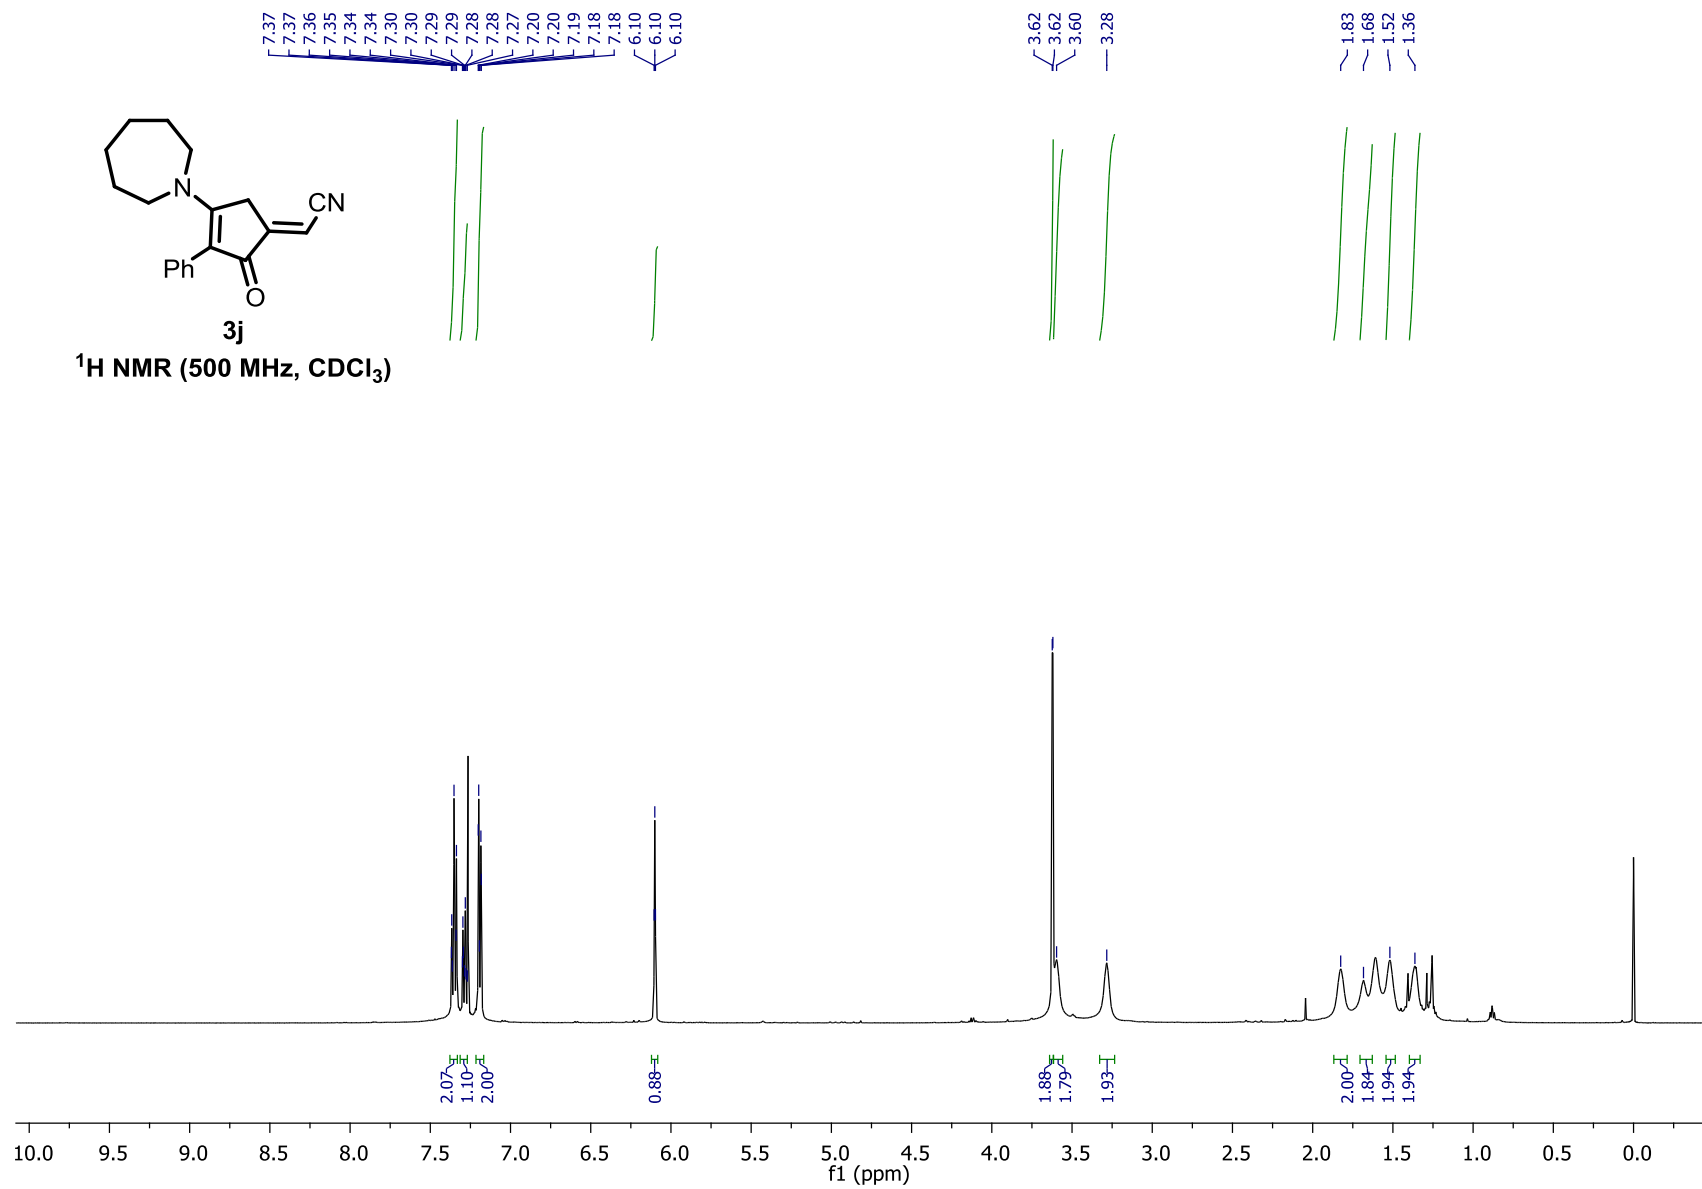

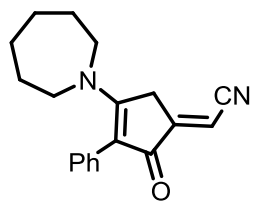

**3j**

<sup>13</sup>C NMR (100 MHz, CDCl<sub>3</sub>)

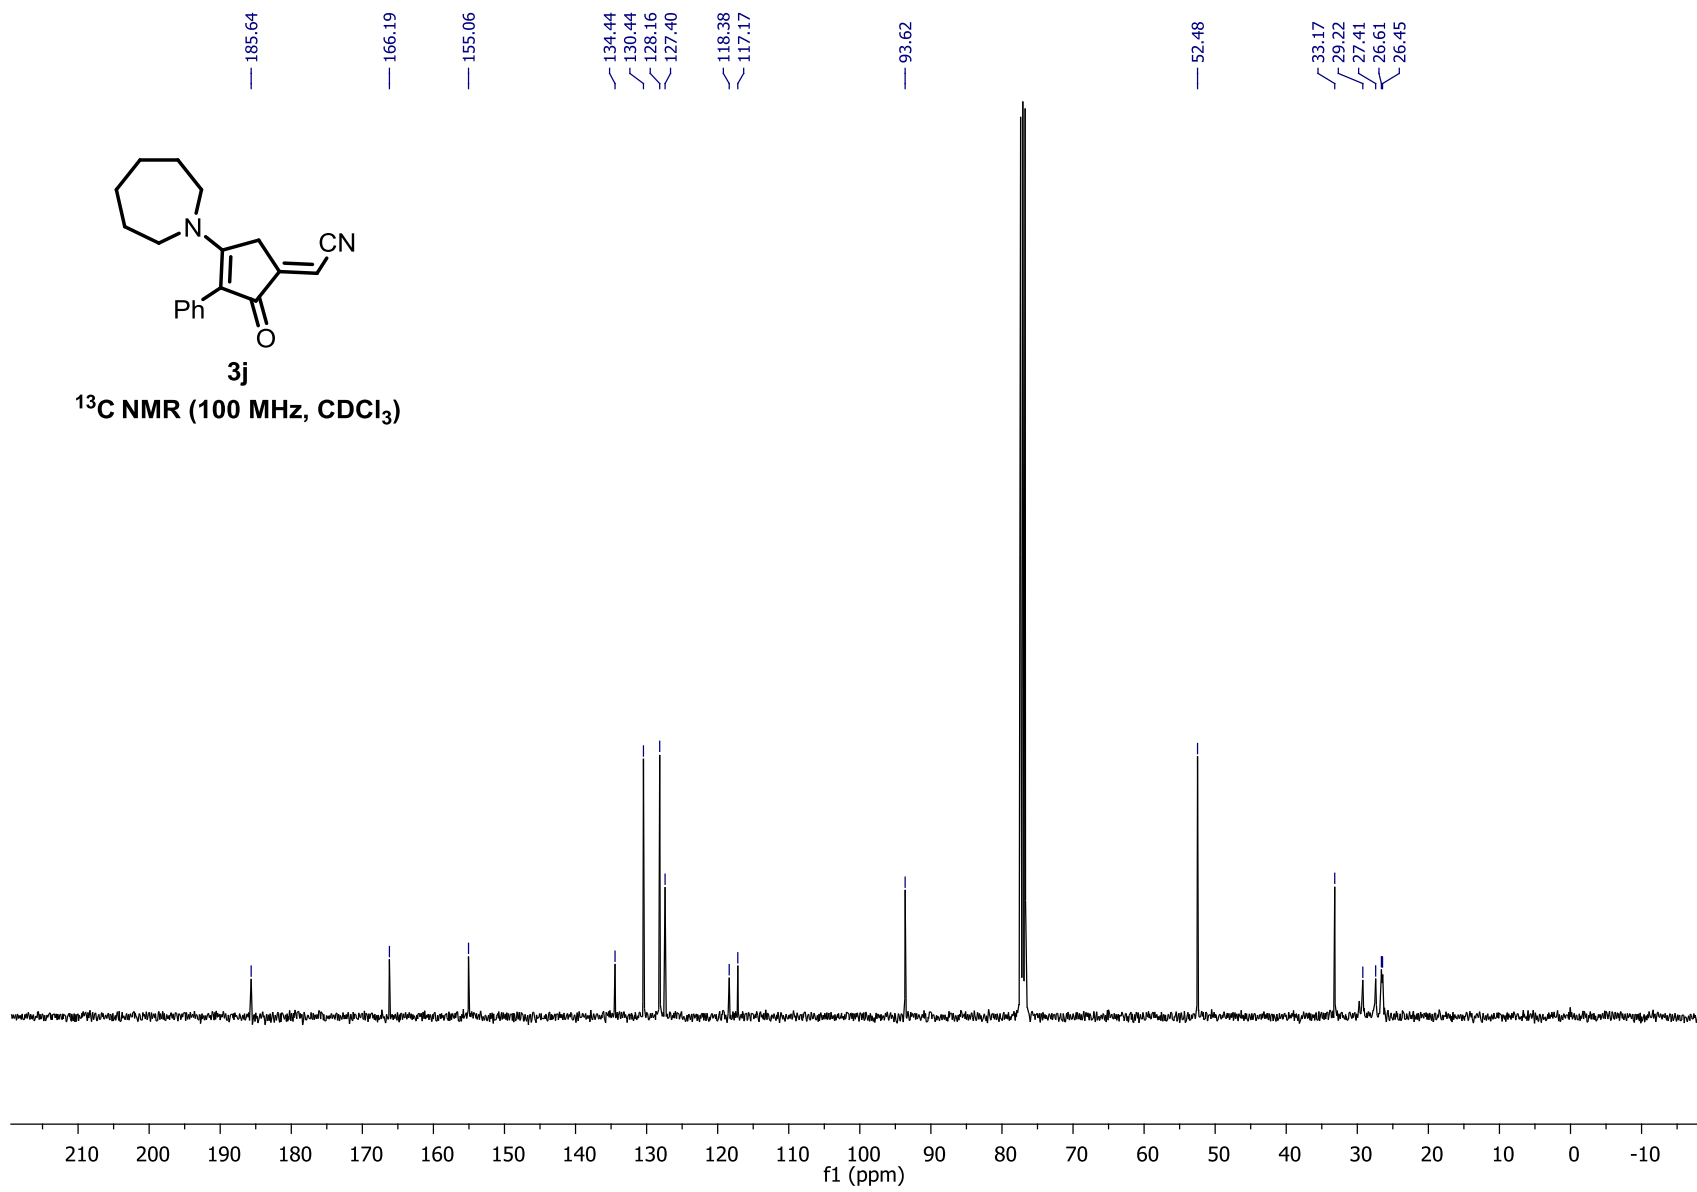

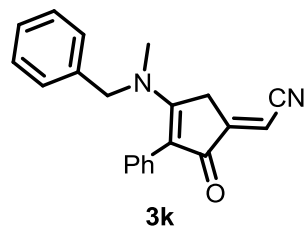

<sup>1</sup>H NMR (400 MHz, CDCl<sub>3</sub>)

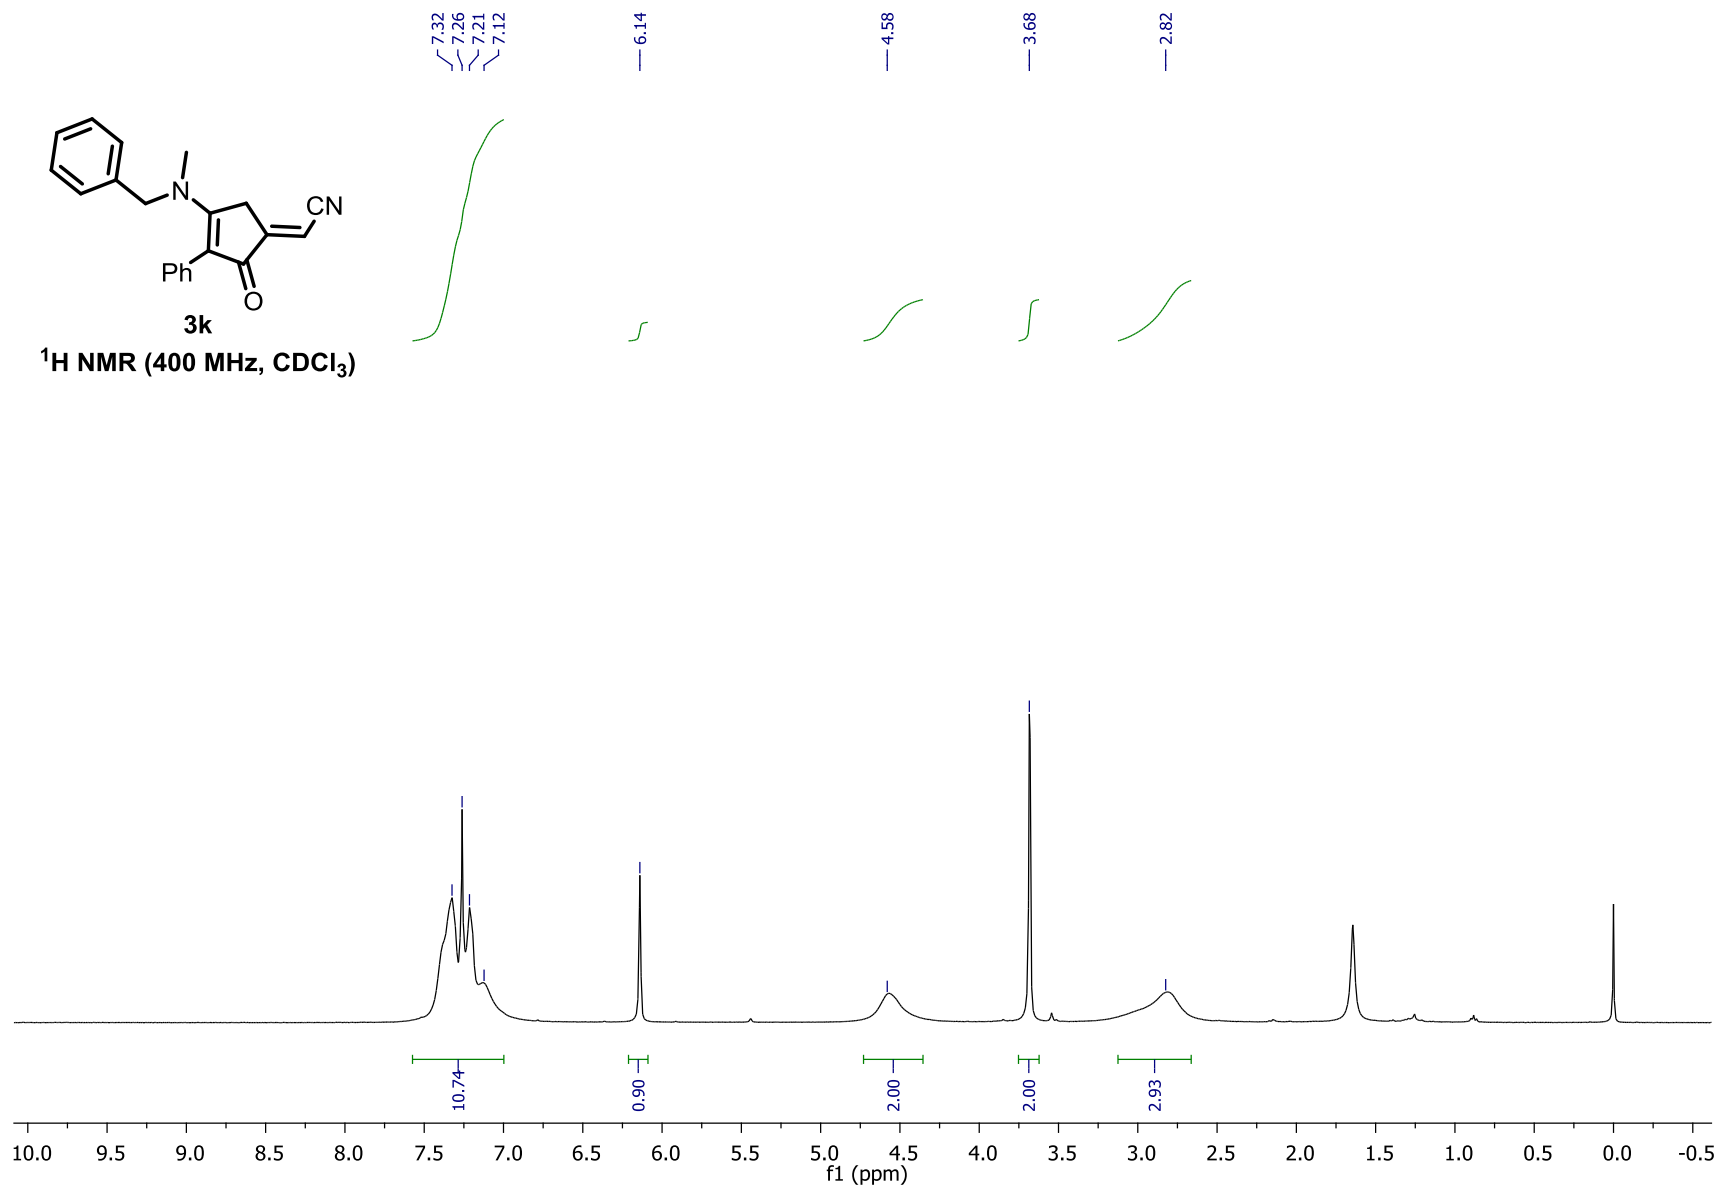

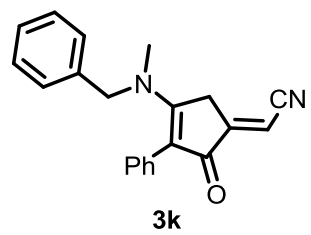

<sup>13</sup>C NMR (100 MHz, CDCl<sub>3</sub>)

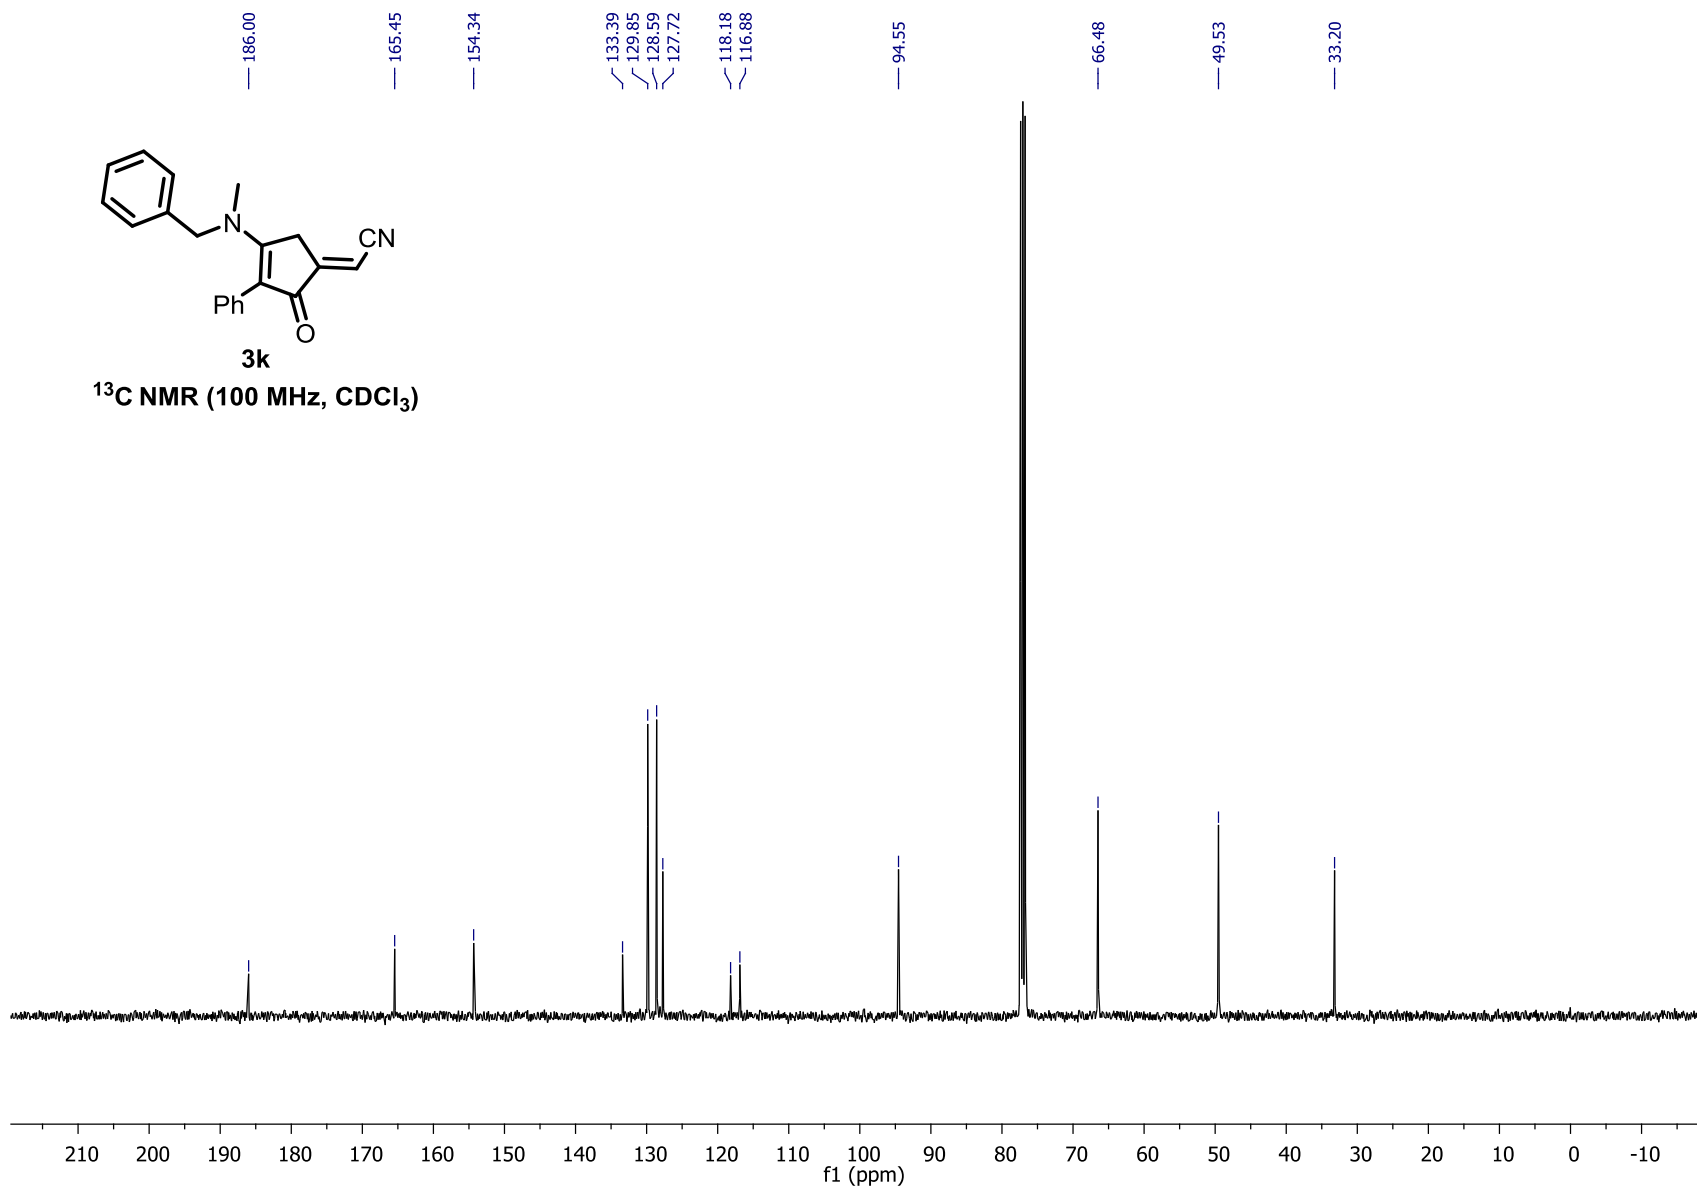

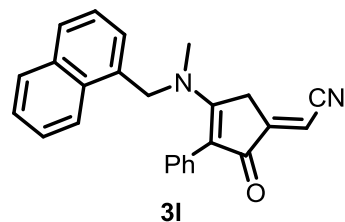

<sup>1</sup>H NMR (400 MHz, CDCl<sub>3</sub>)

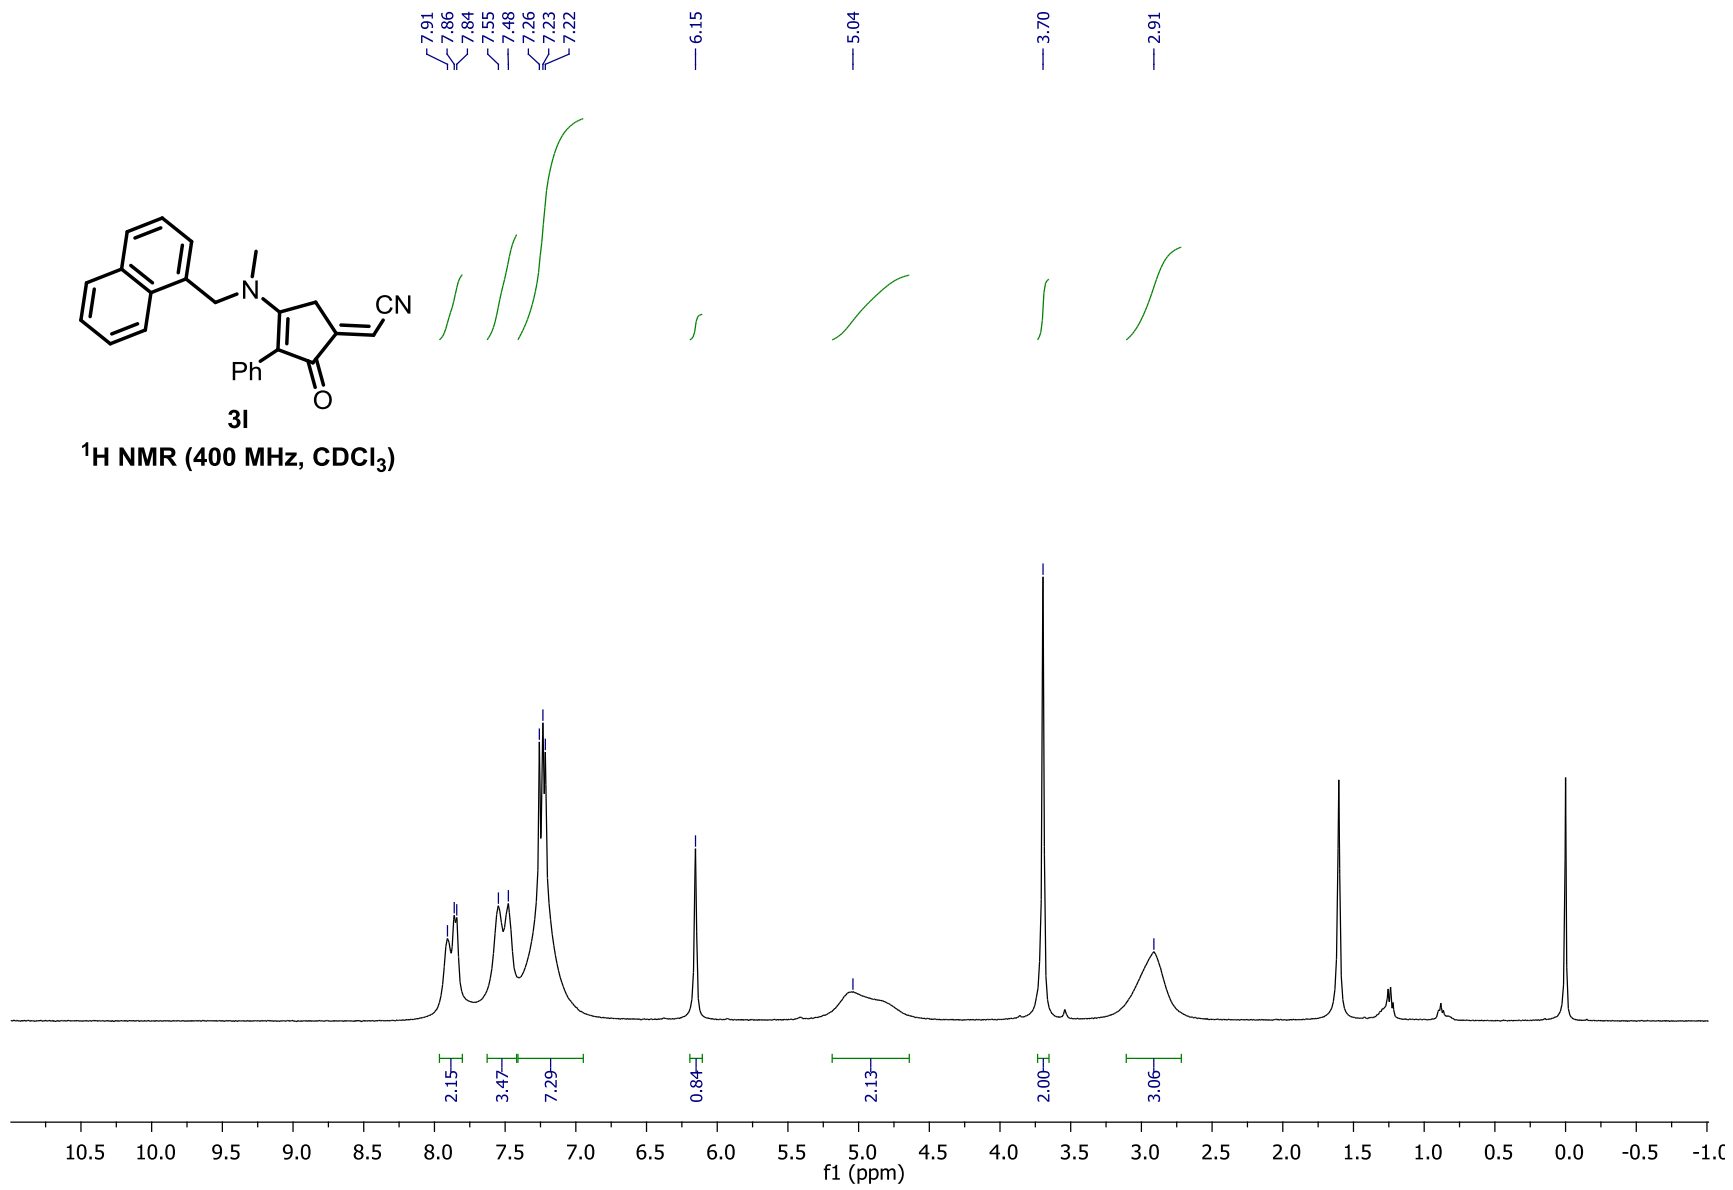



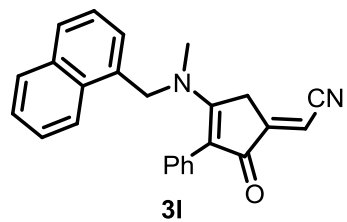

**C<sup>13</sup> NMR (100 MHz, CDCl<sub>3</sub>)**

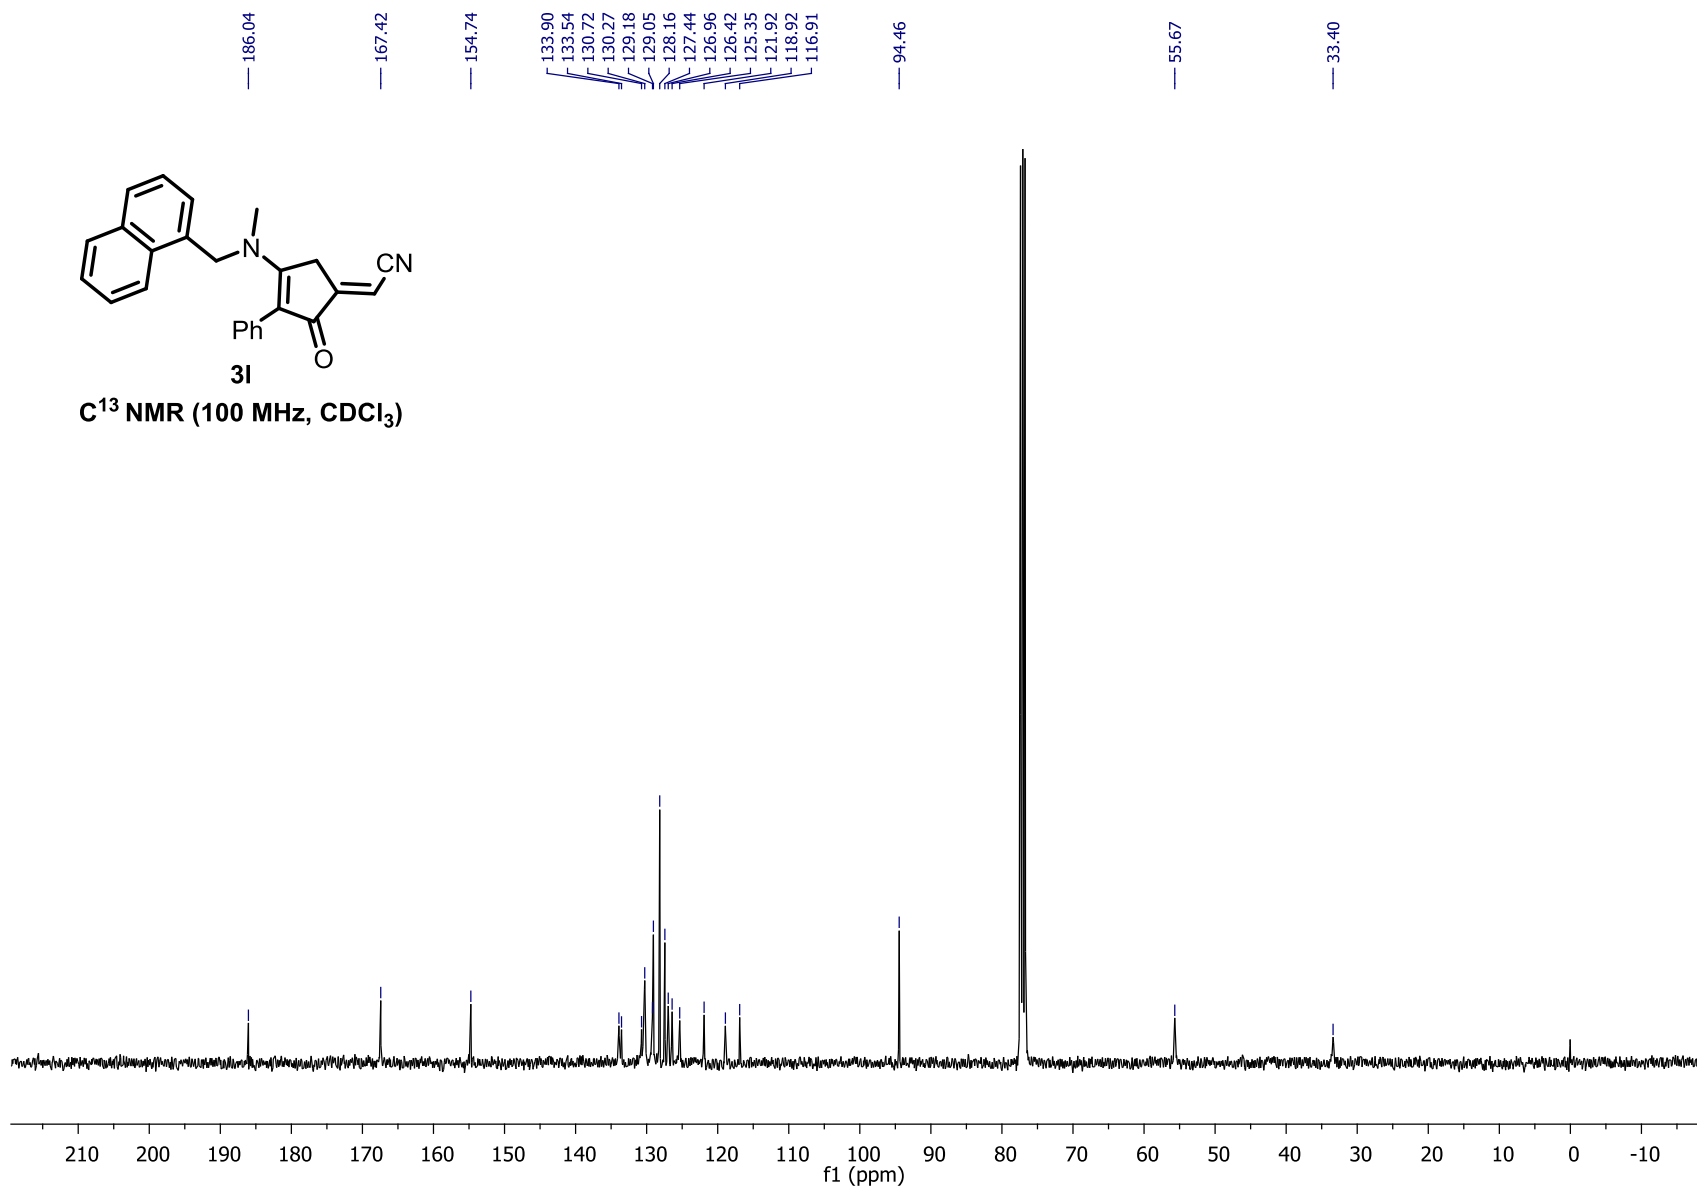

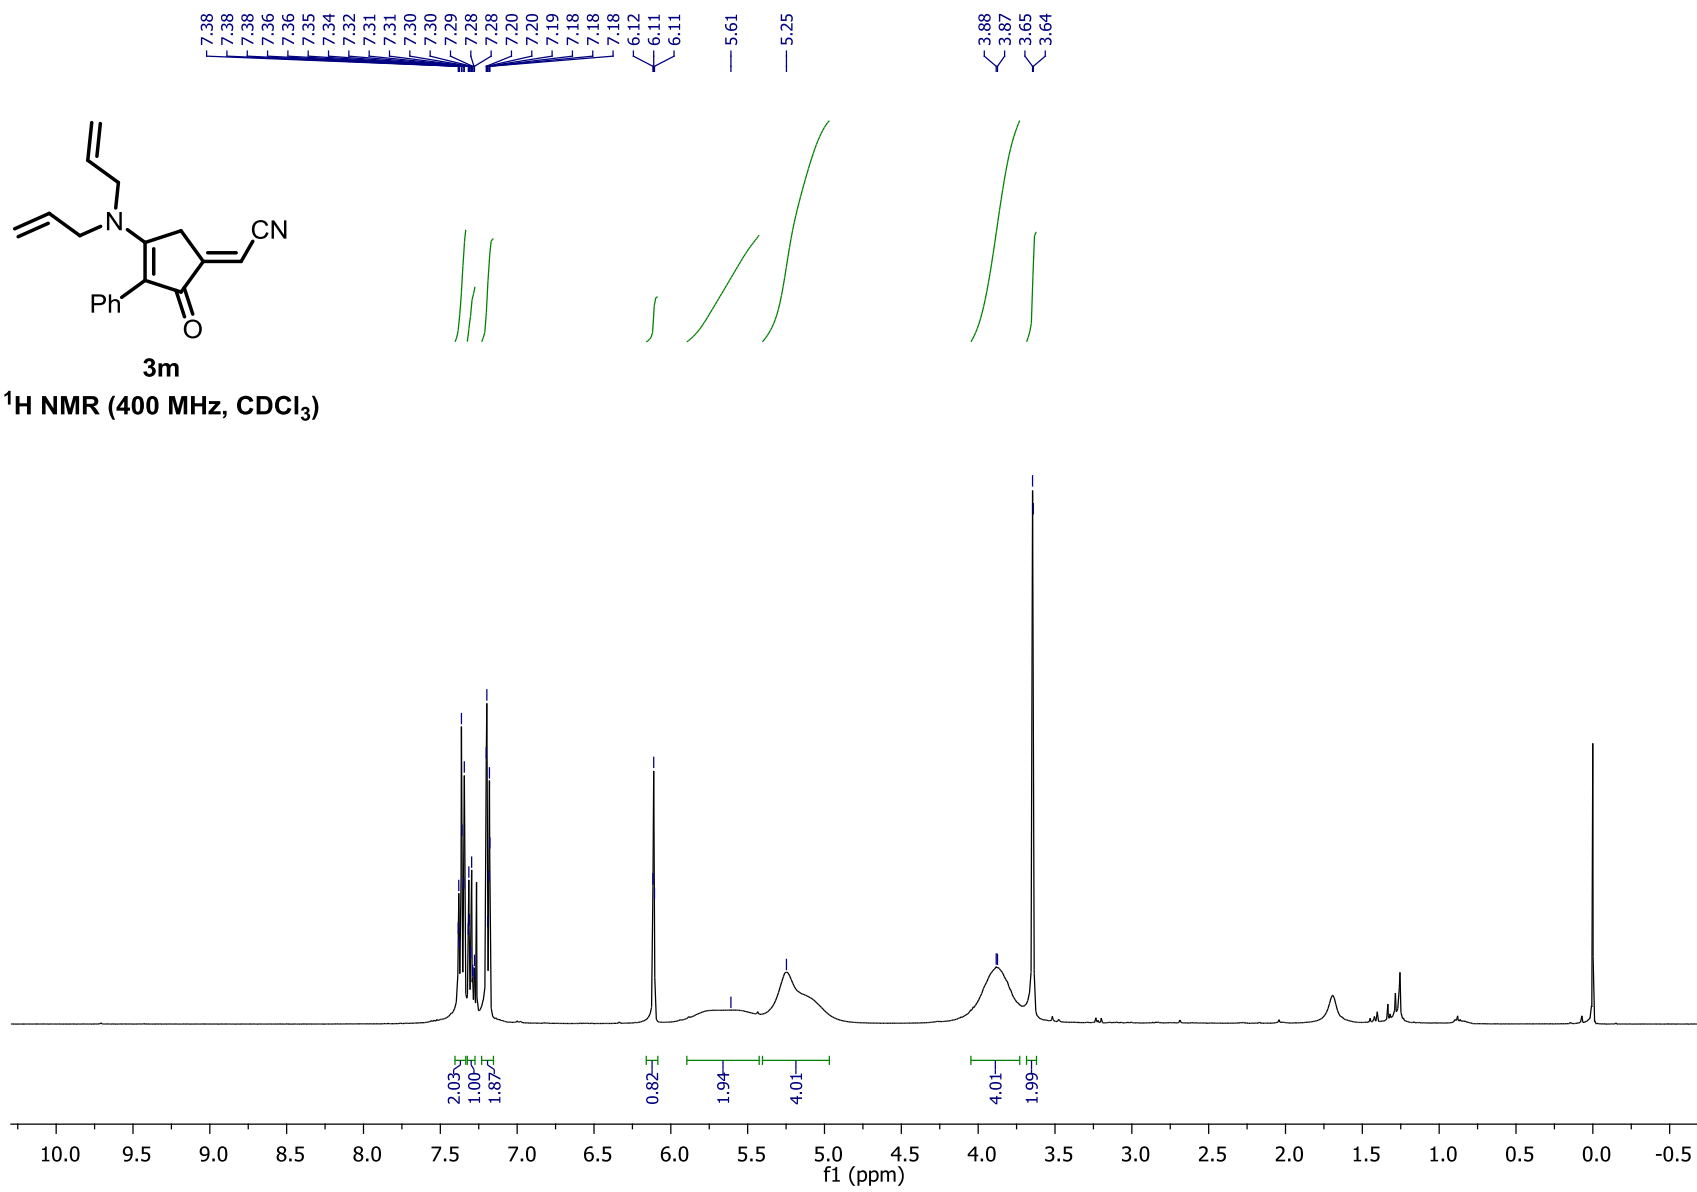

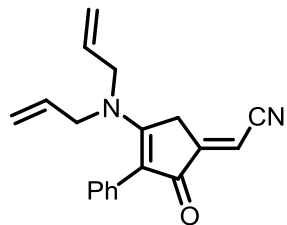

**3m**  
**C<sup>13</sup> NMR (101 MHz, CDCl<sub>3</sub>)**

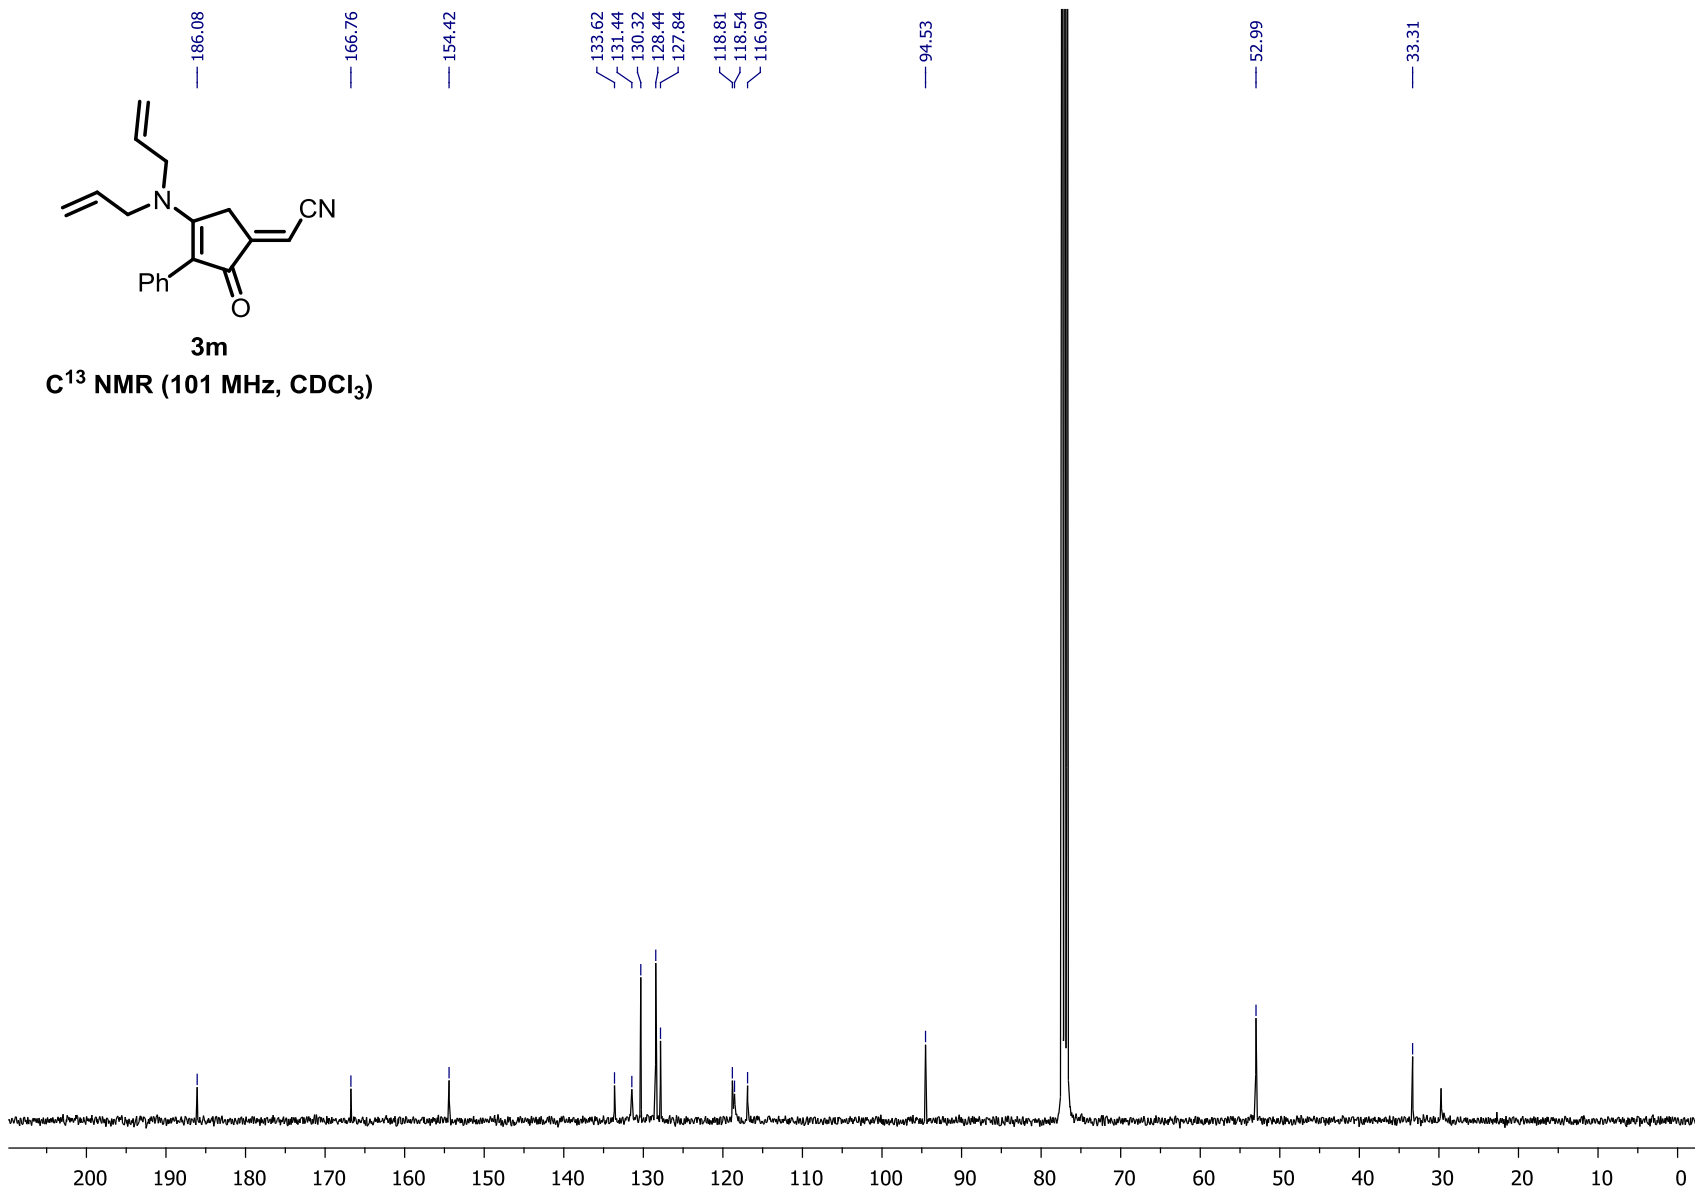

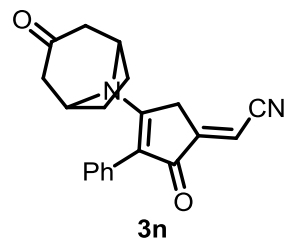

**<sup>1</sup>H NMR (400 MHz, CDCl<sub>3</sub>)**

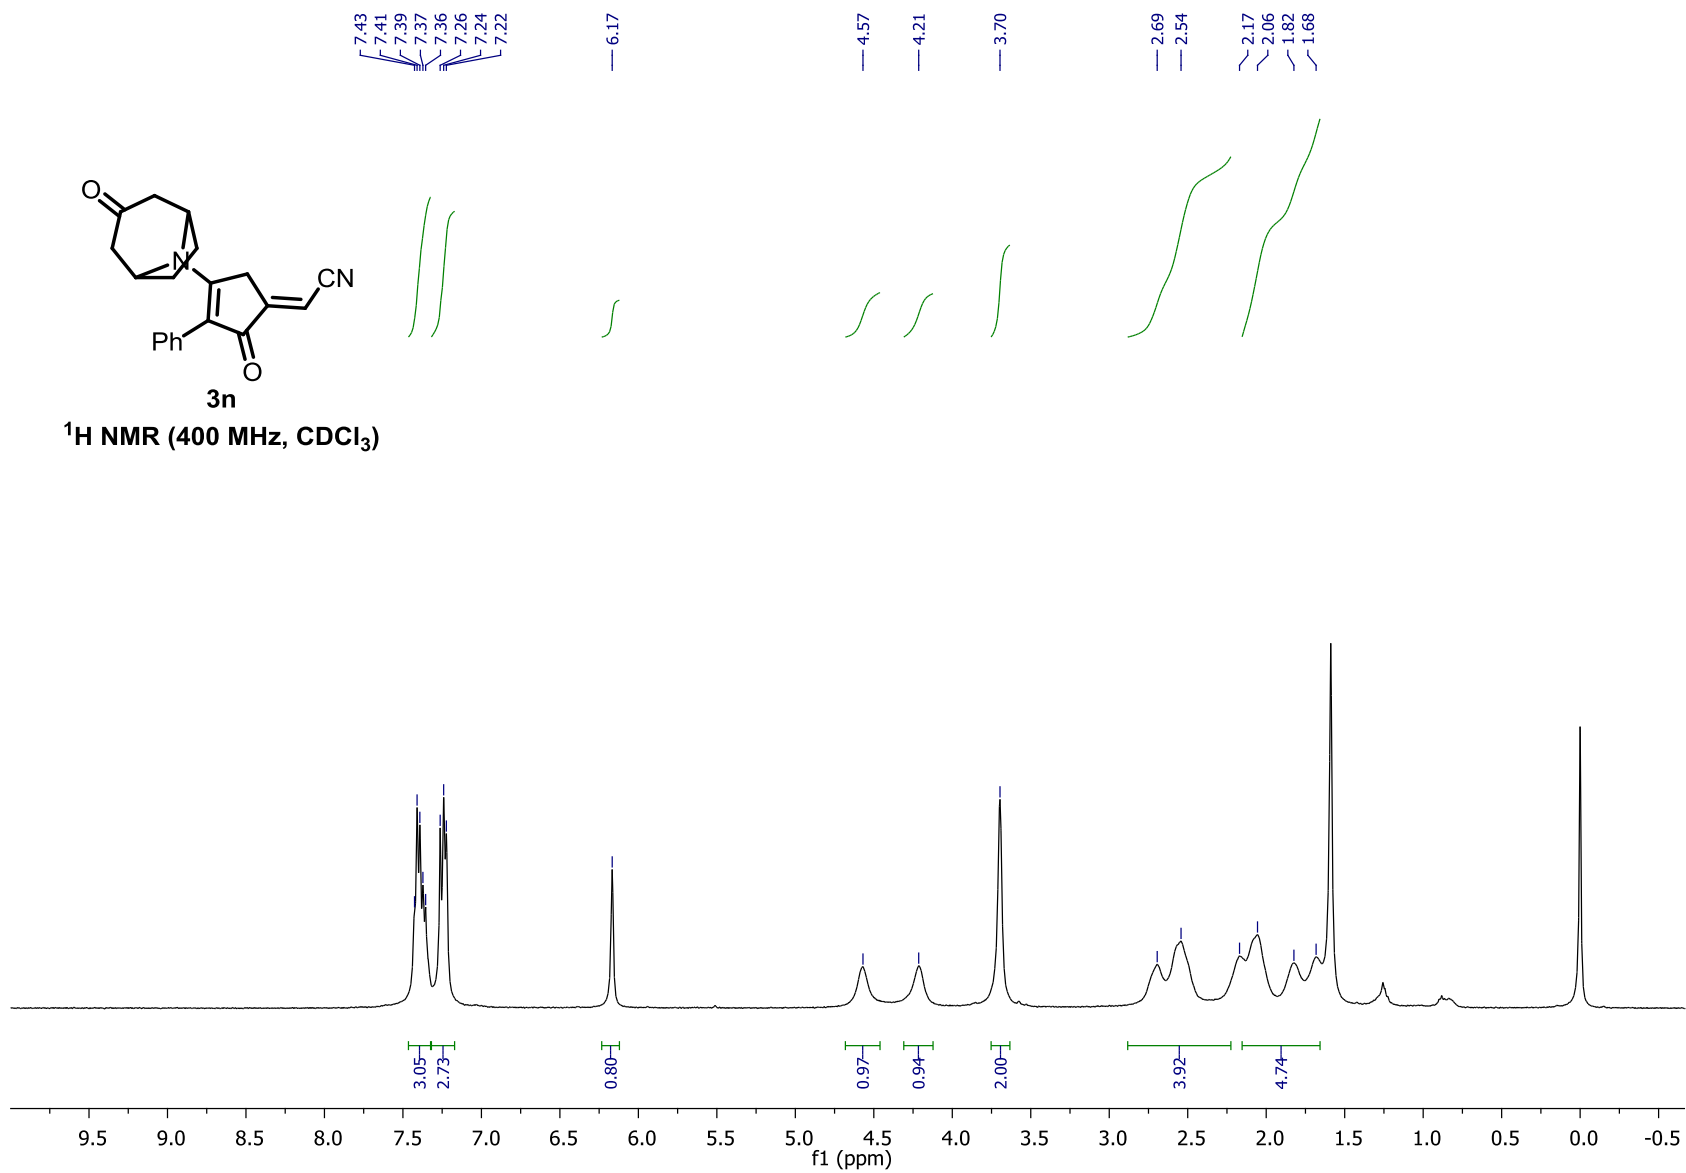

— 204.88 — 185.86 — 161.47 — 154.19 — 133.19 — 129.87 — 128.80 — 128.24 — 118.91 — 116.82 — 95.02 — 57.15 — 54.74 — 49.75 — 48.34 — 33.09 — 28.29

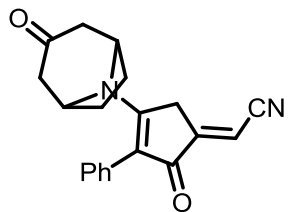

3n

<sup>13</sup>C NMR (100 MHz, CDCl<sub>3</sub>)

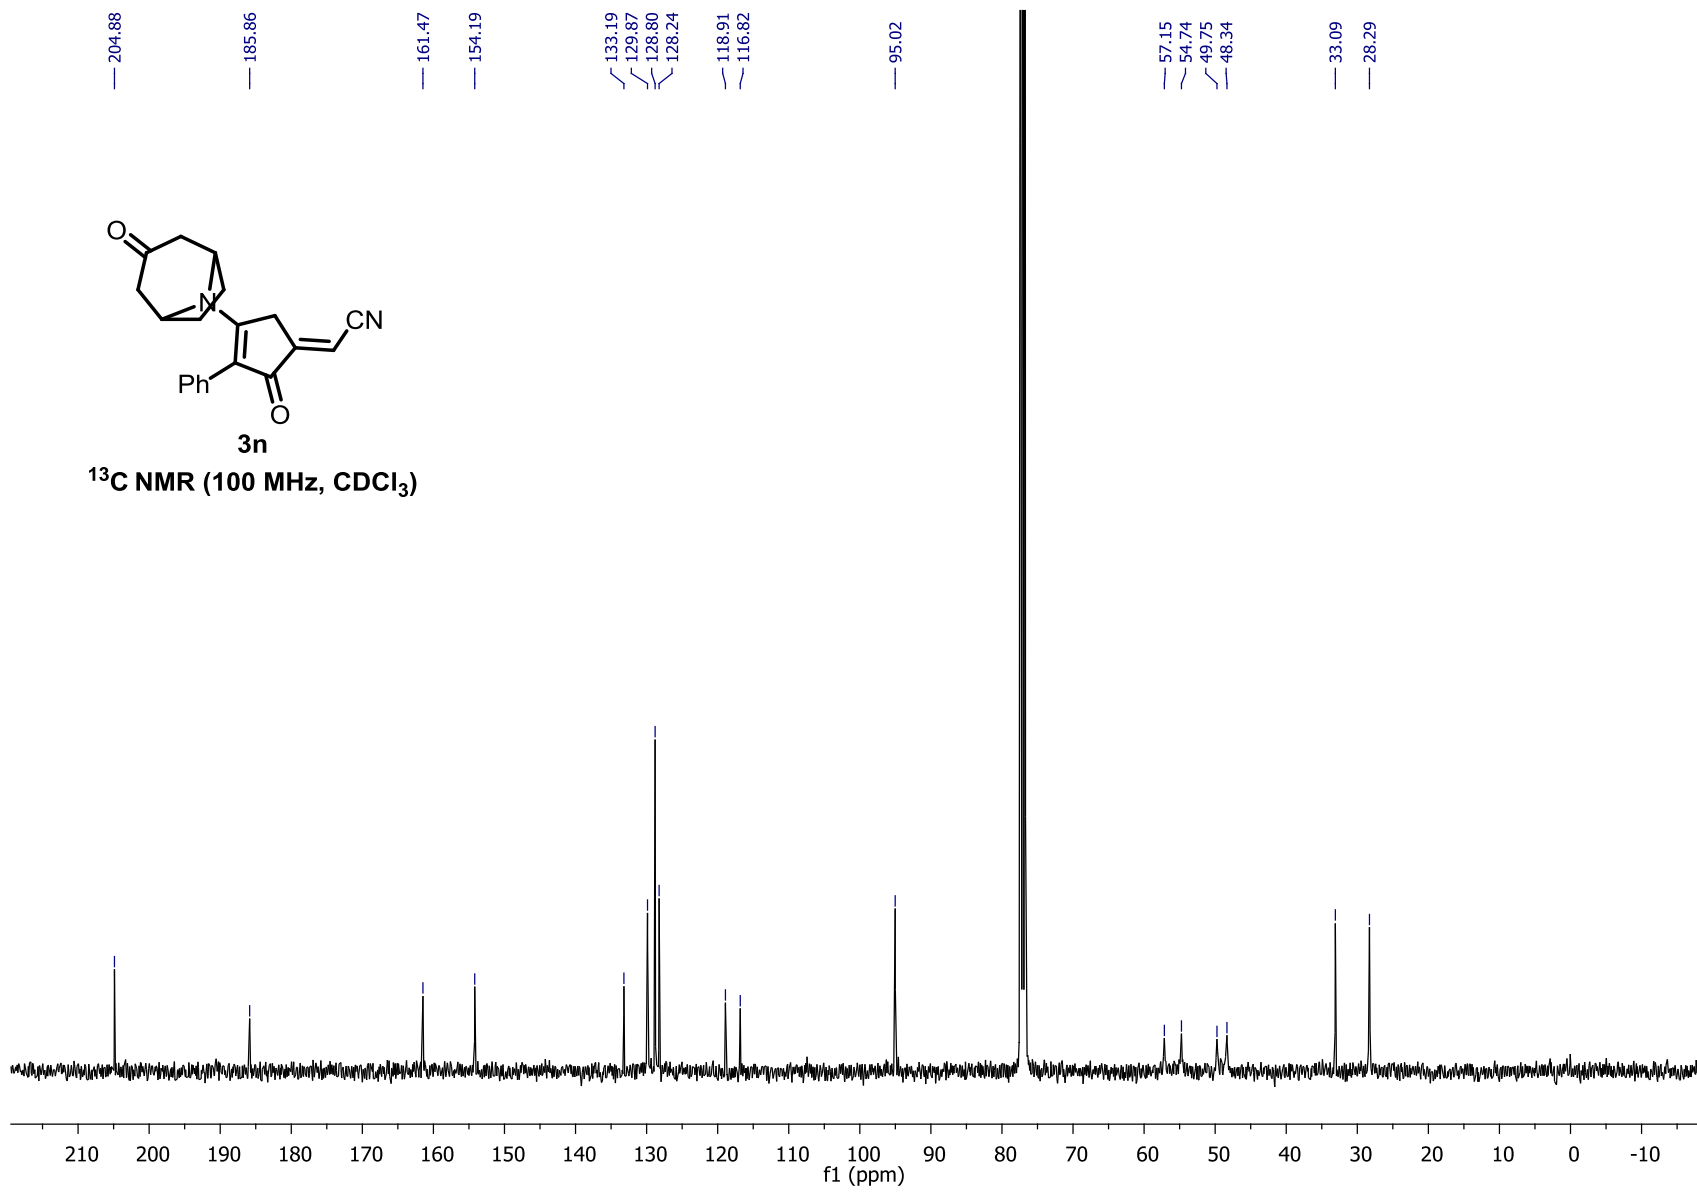

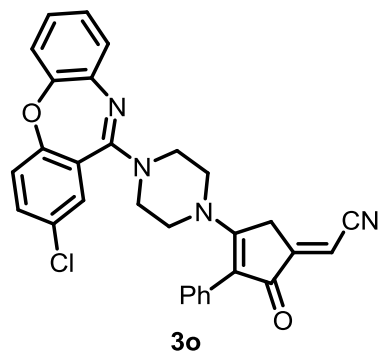

<sup>1</sup>H NMR (400 MHz, CDCl<sub>3</sub>)

7.41  
7.39  
7.37  
7.32  
7.30  
7.24  
7.22  
7.20  
7.18  
7.11  
7.10  
7.05  
7.03  
6.15

3.63  
3.54

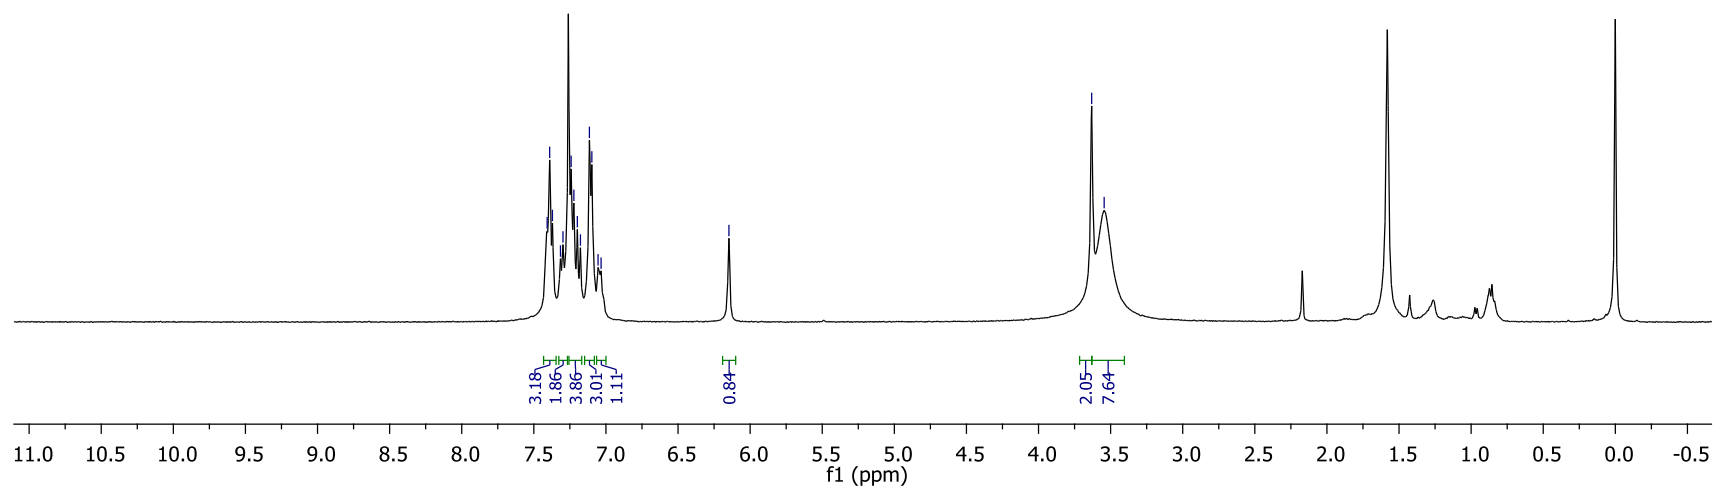

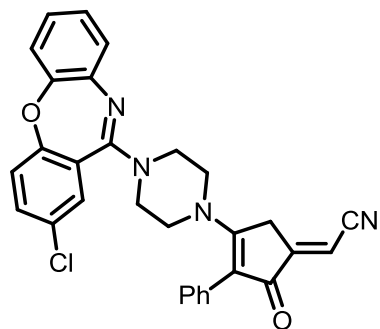

<sup>13</sup>C NMR (100 MHz, CDCl<sub>3</sub>)

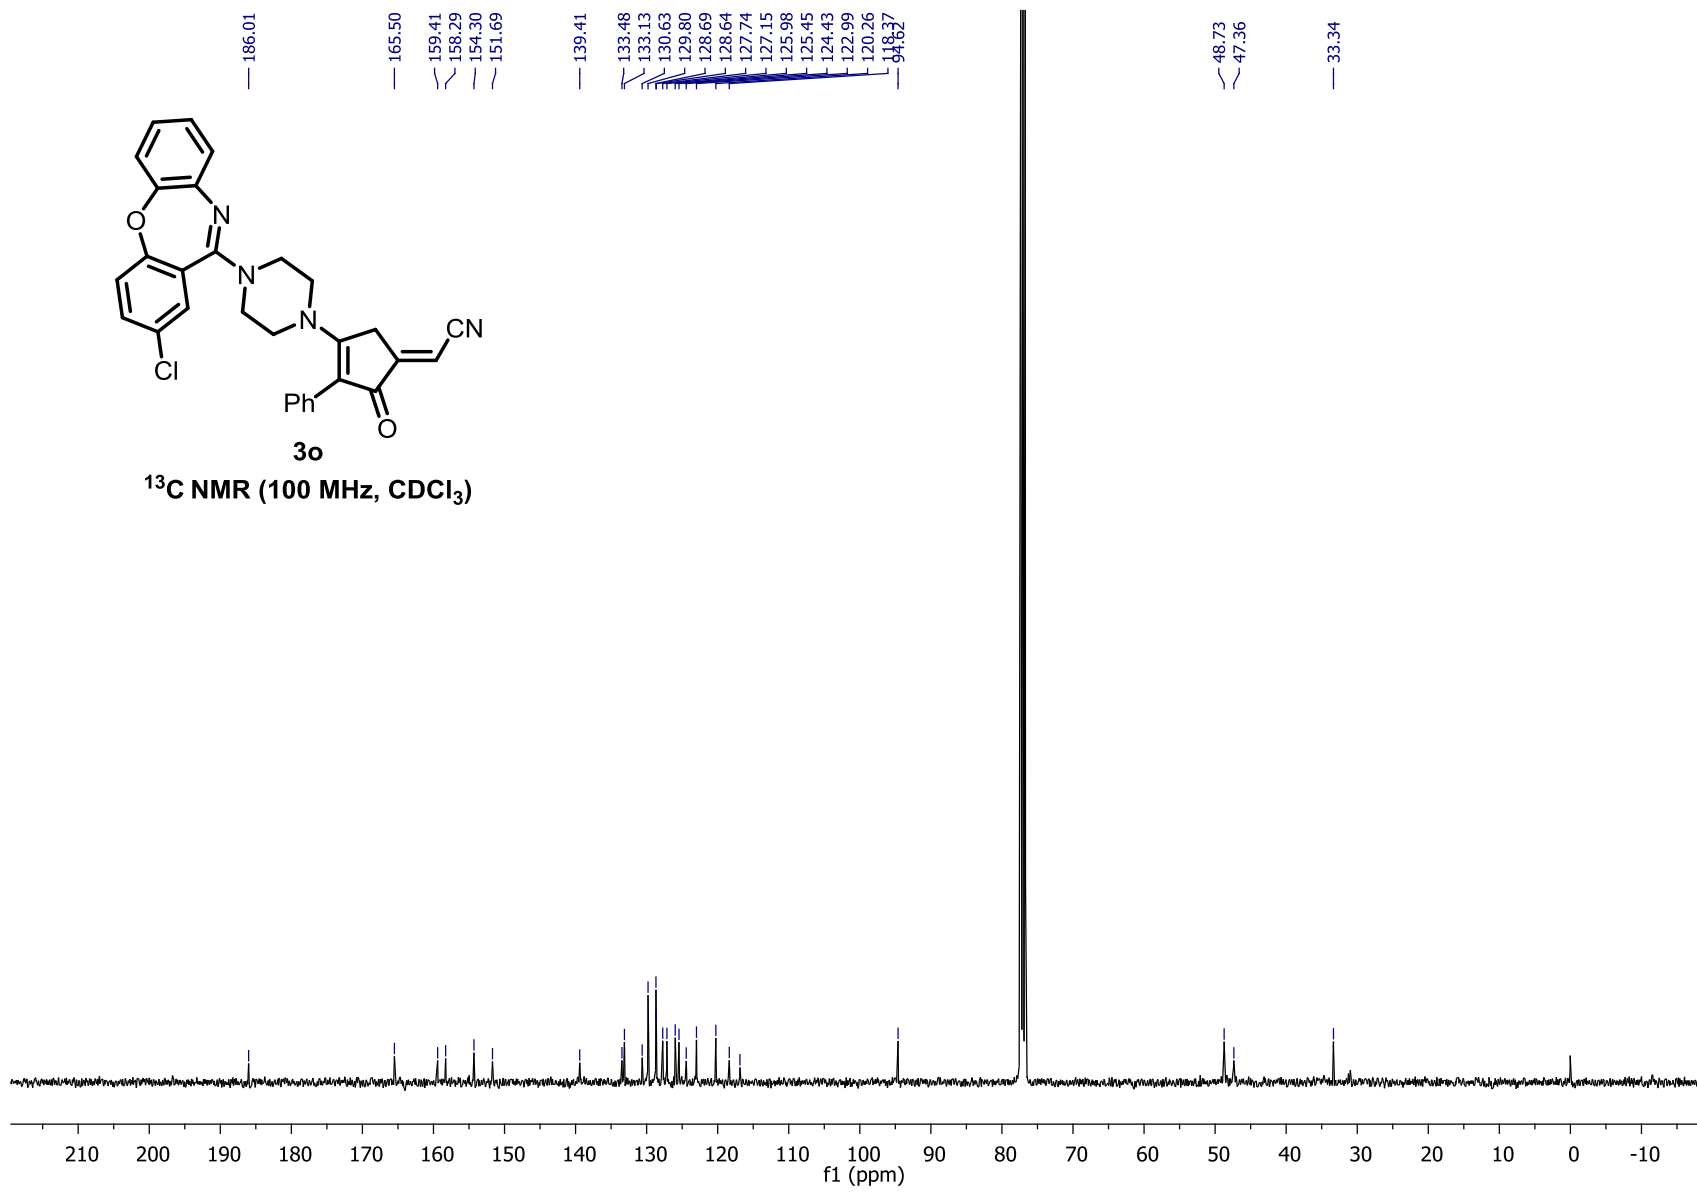

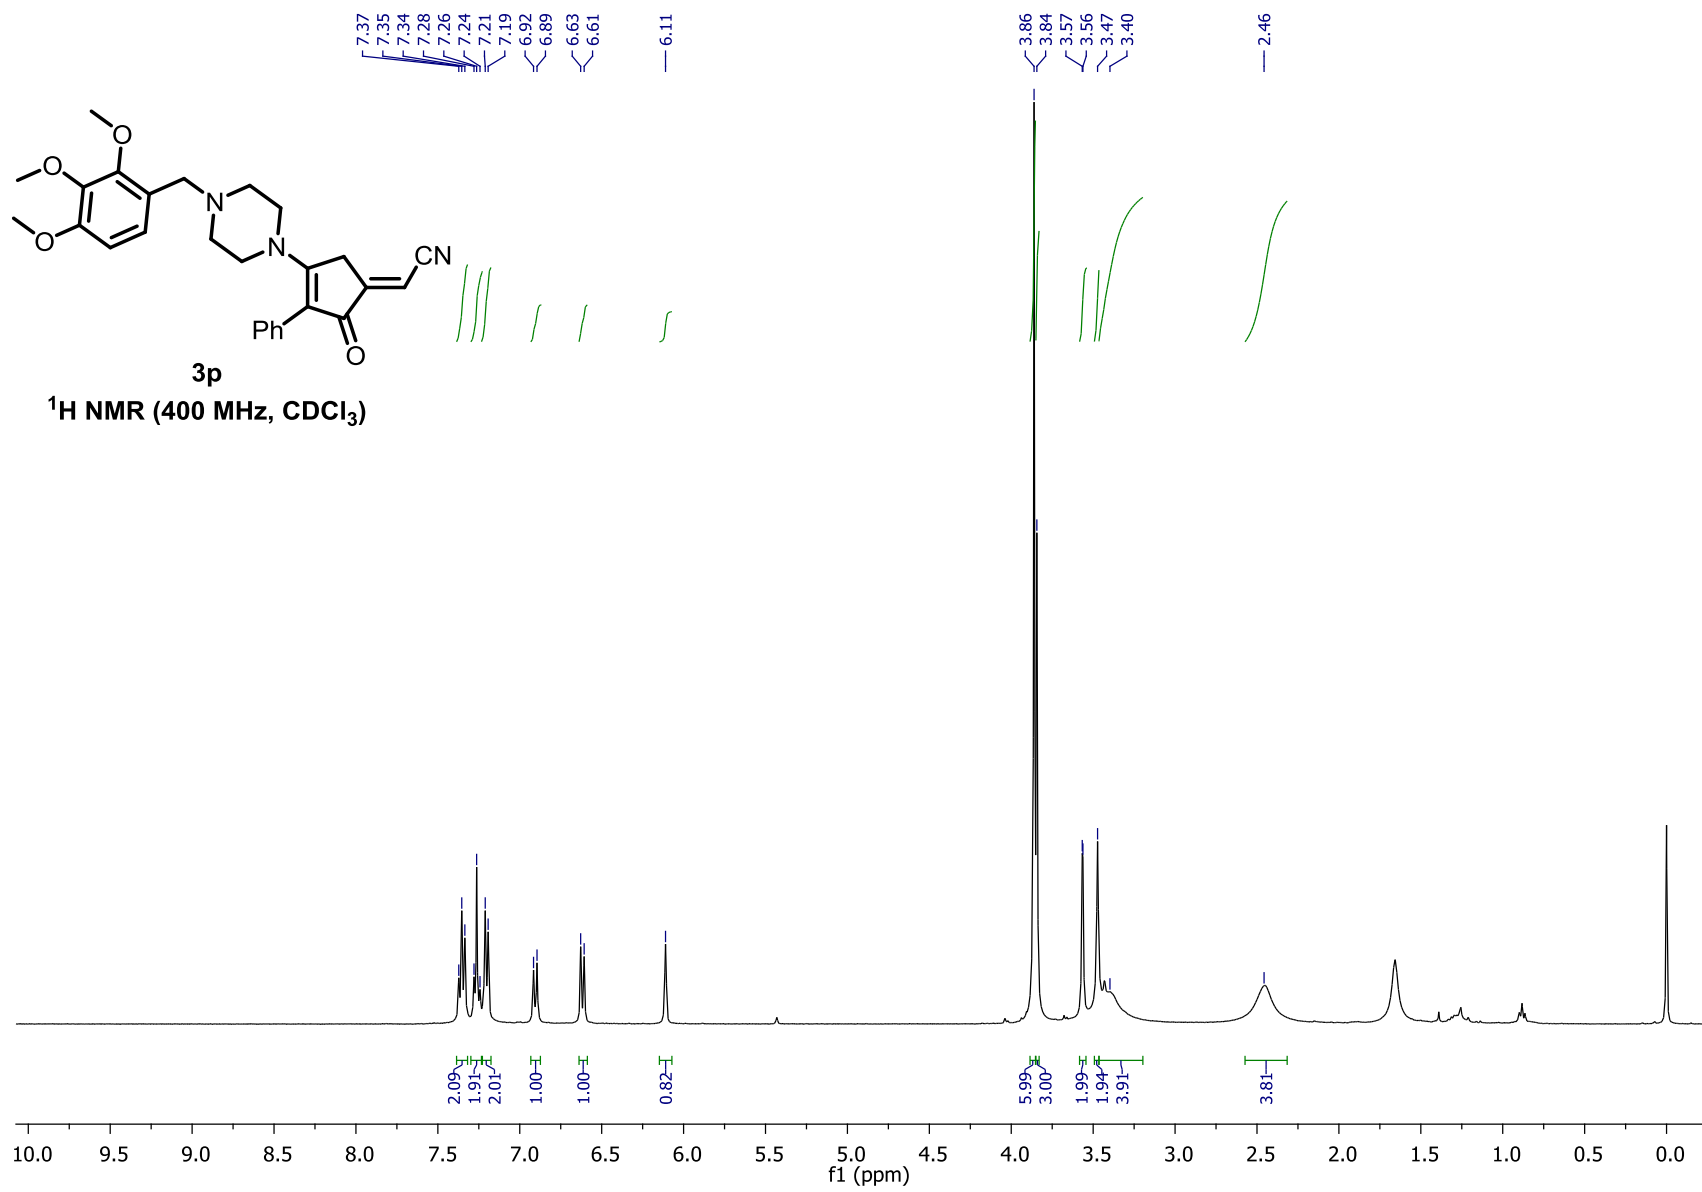



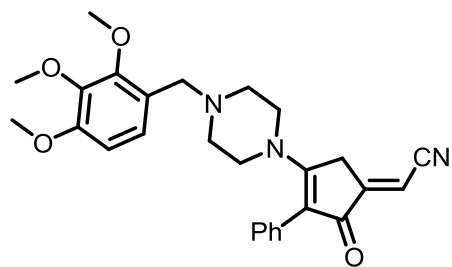

3p

$^{13}\text{C}$  NMR (100 MHz,  $\text{CDCl}_3$ )

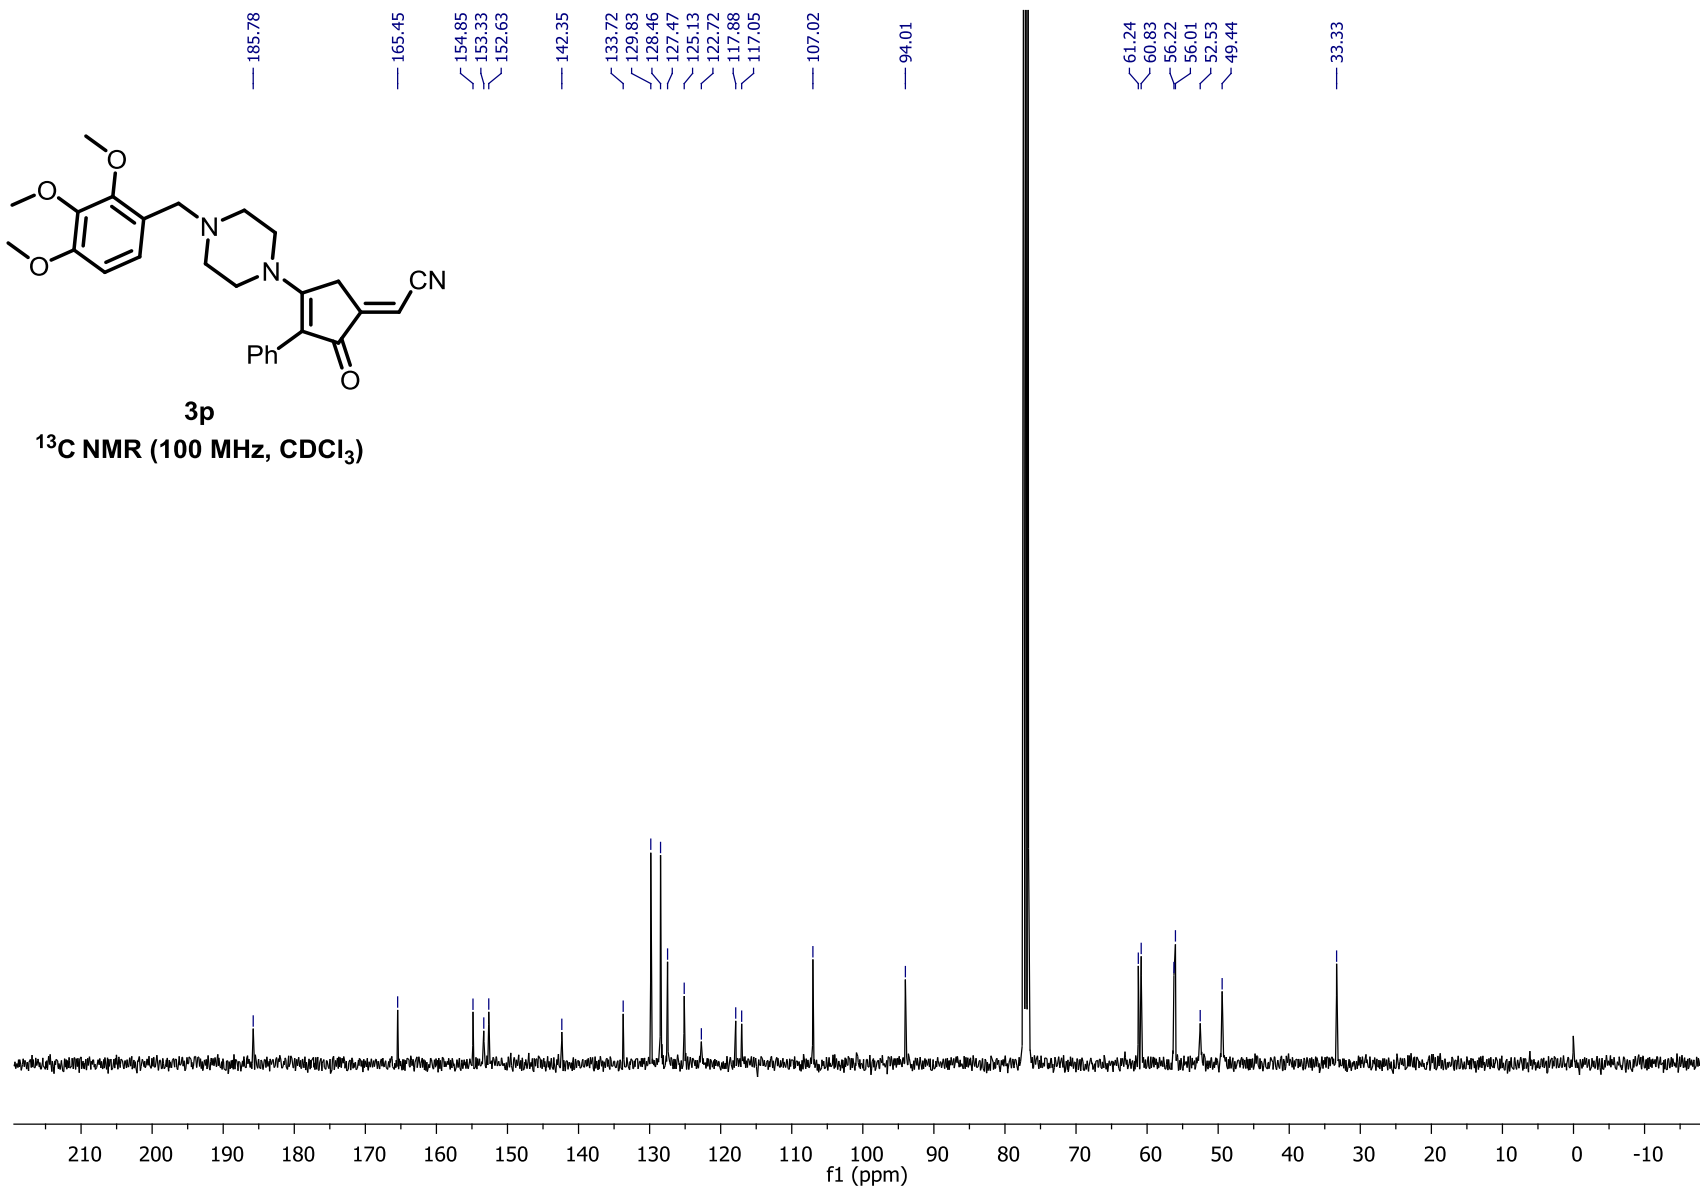

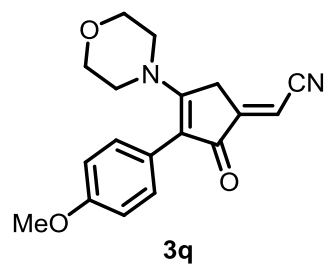

<sup>1</sup>H NMR (400 MHz, CDCl<sub>3</sub>)

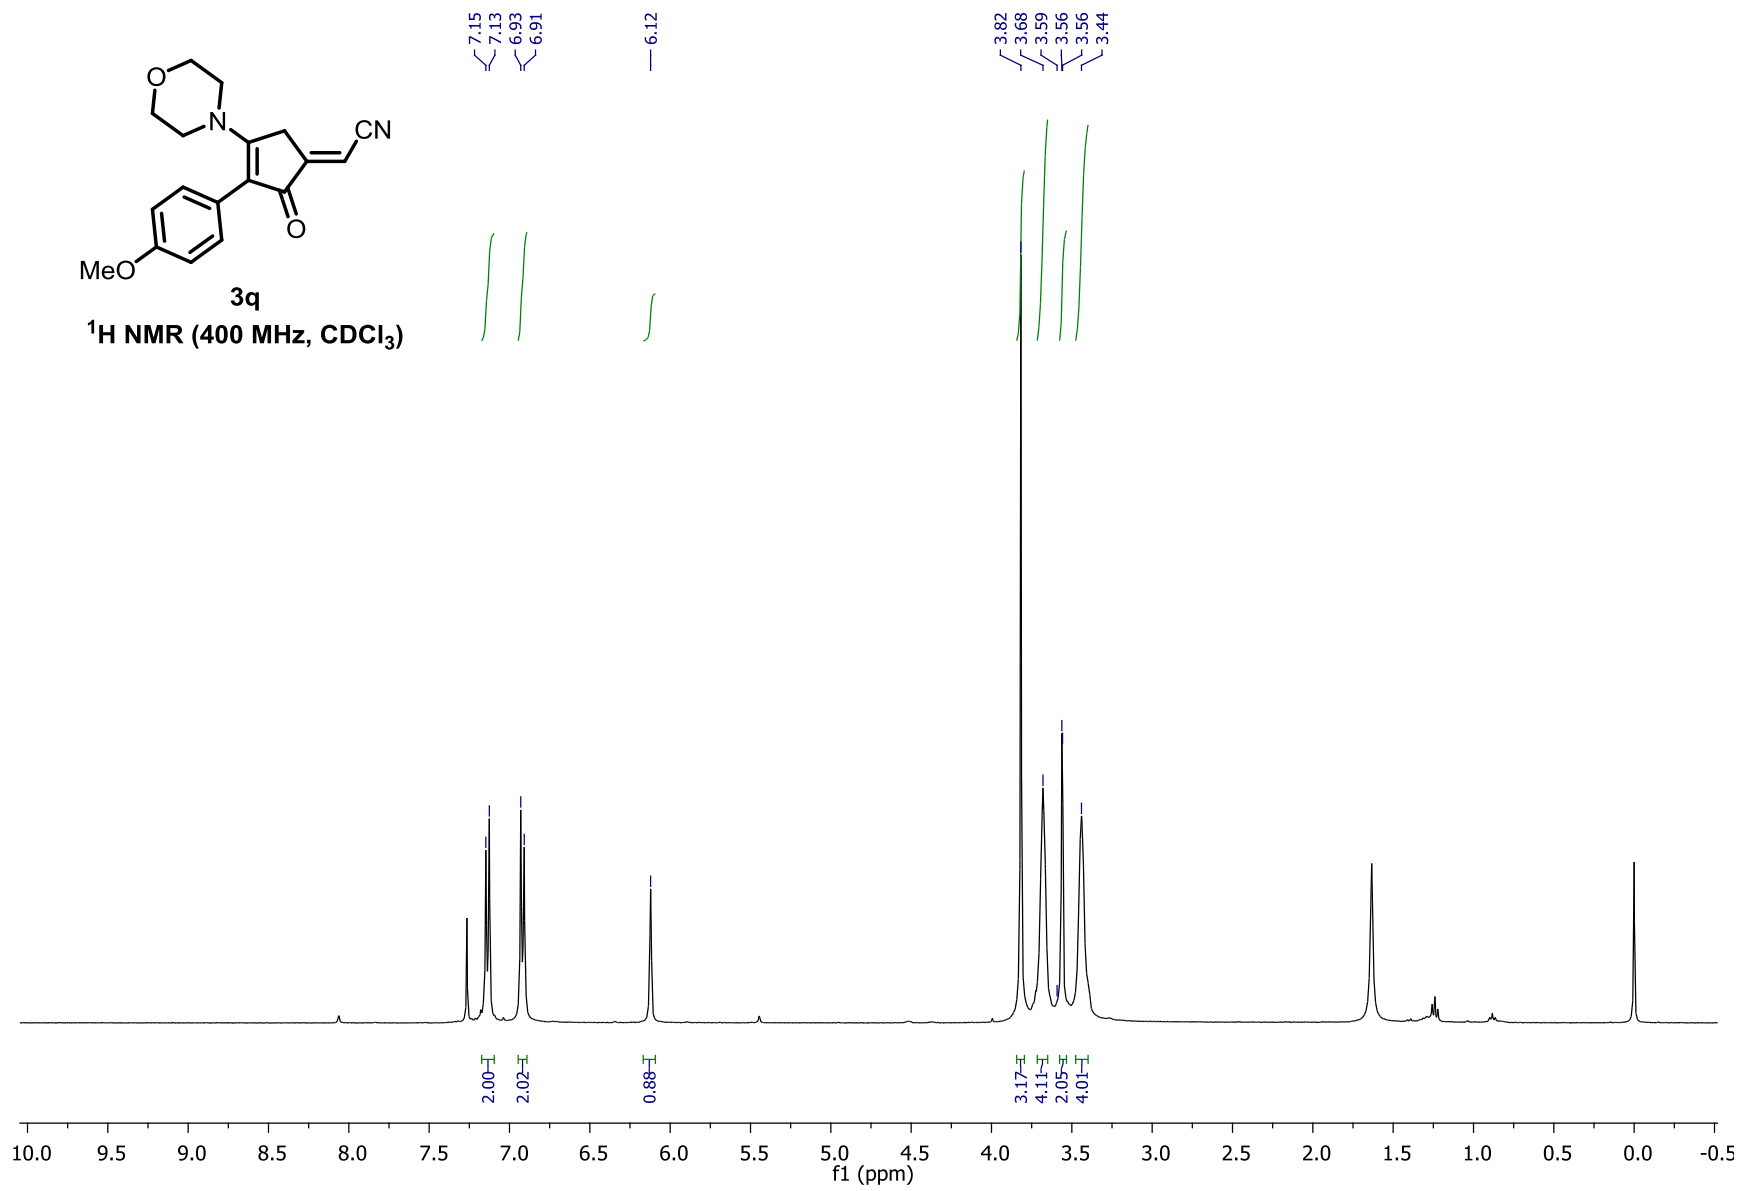

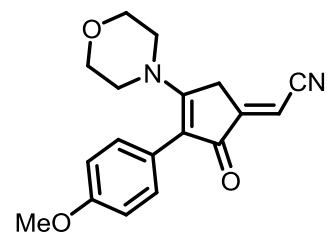

**3q**  
**C<sup>13</sup> NMR (100 MHz, CDCl<sub>3</sub>)**

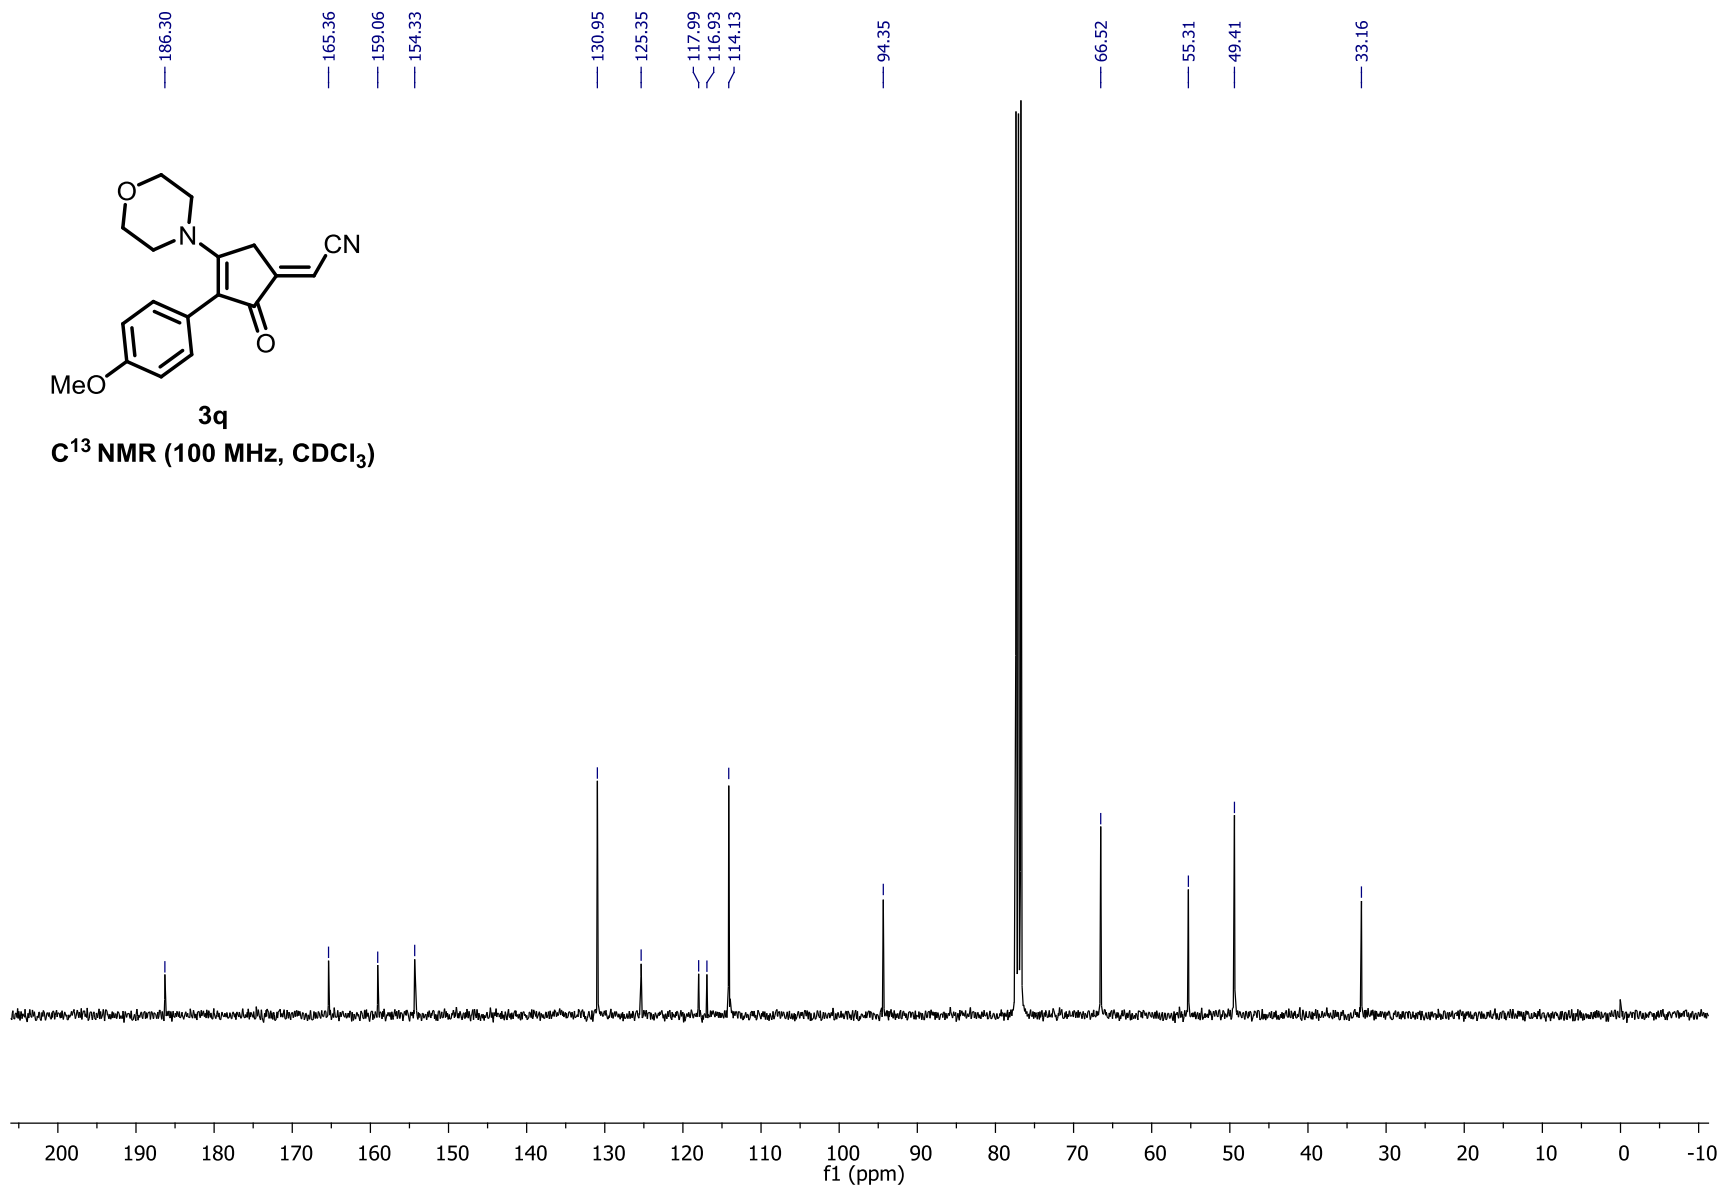

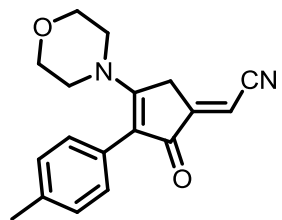

3r

<sup>1</sup>H NMR (400 MHz, CDCl<sub>3</sub>)

7.20  
7.18  
7.11  
7.09

6.12

3.68  
3.57  
3.56  
3.43

2.35

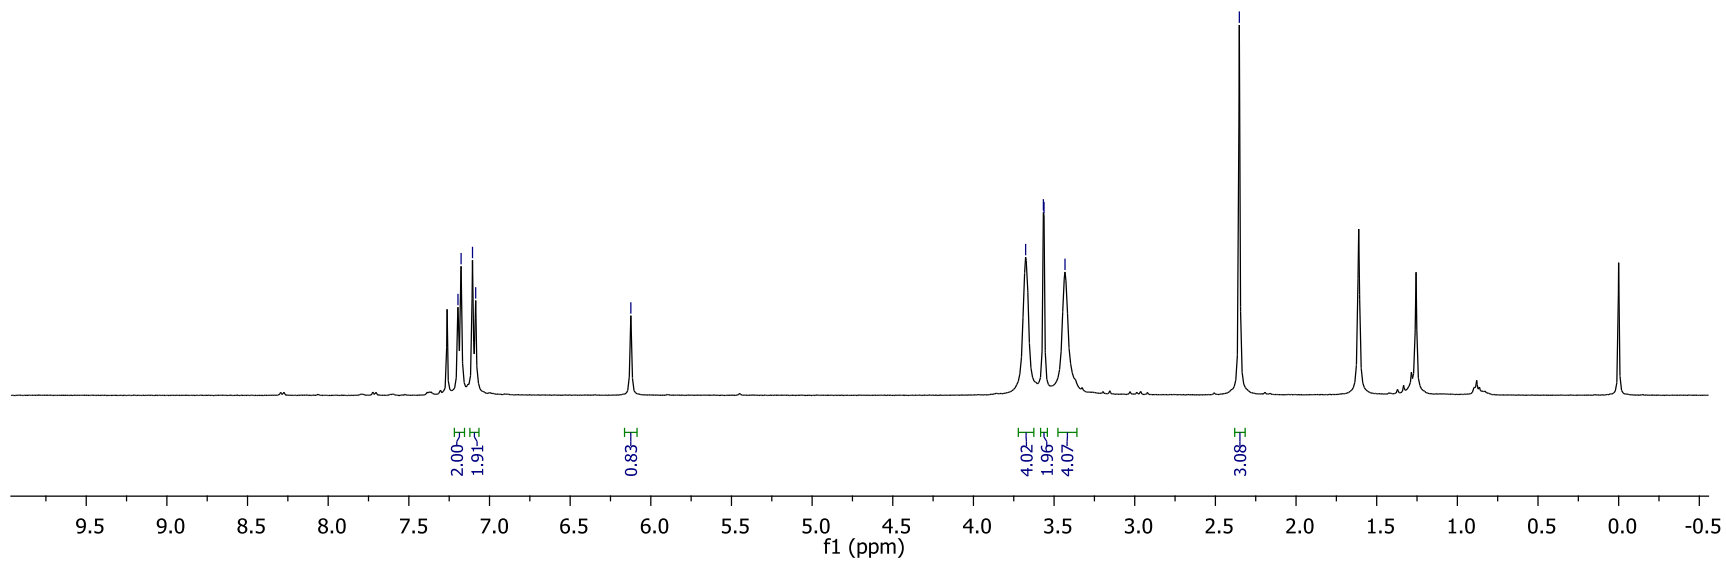

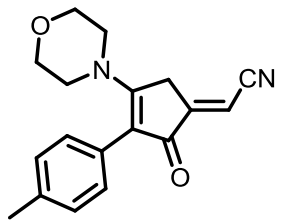

3r

C<sup>13</sup> NMR (100 MHz, CDCl<sub>3</sub>)

- 186.17
- 165.29
- 154.38
- 137.52
- 130.26
- 129.66
- 129.34
- 118.28
- 116.93
- 94.40
- 66.51
- 49.45
- 33.17
- 21.33

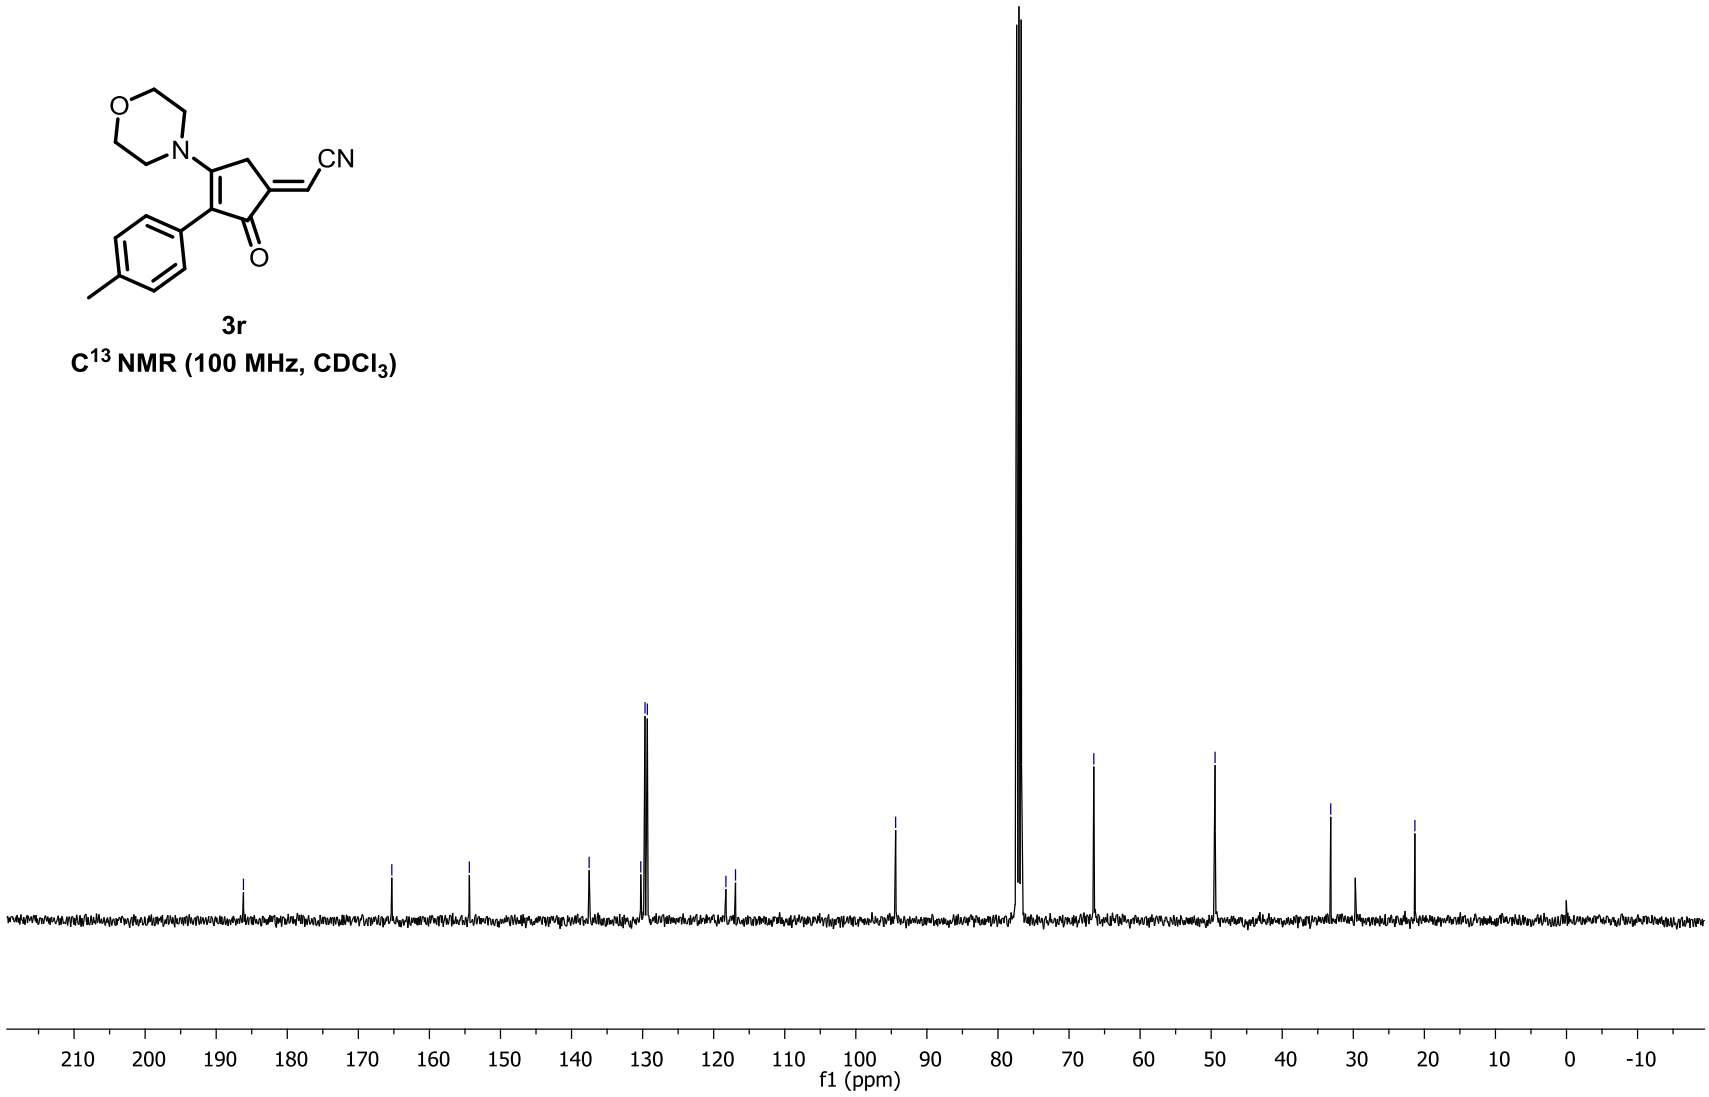

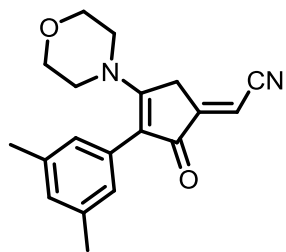

3s

<sup>1</sup>H NMR (400 MHz, CDCl<sub>3</sub>)

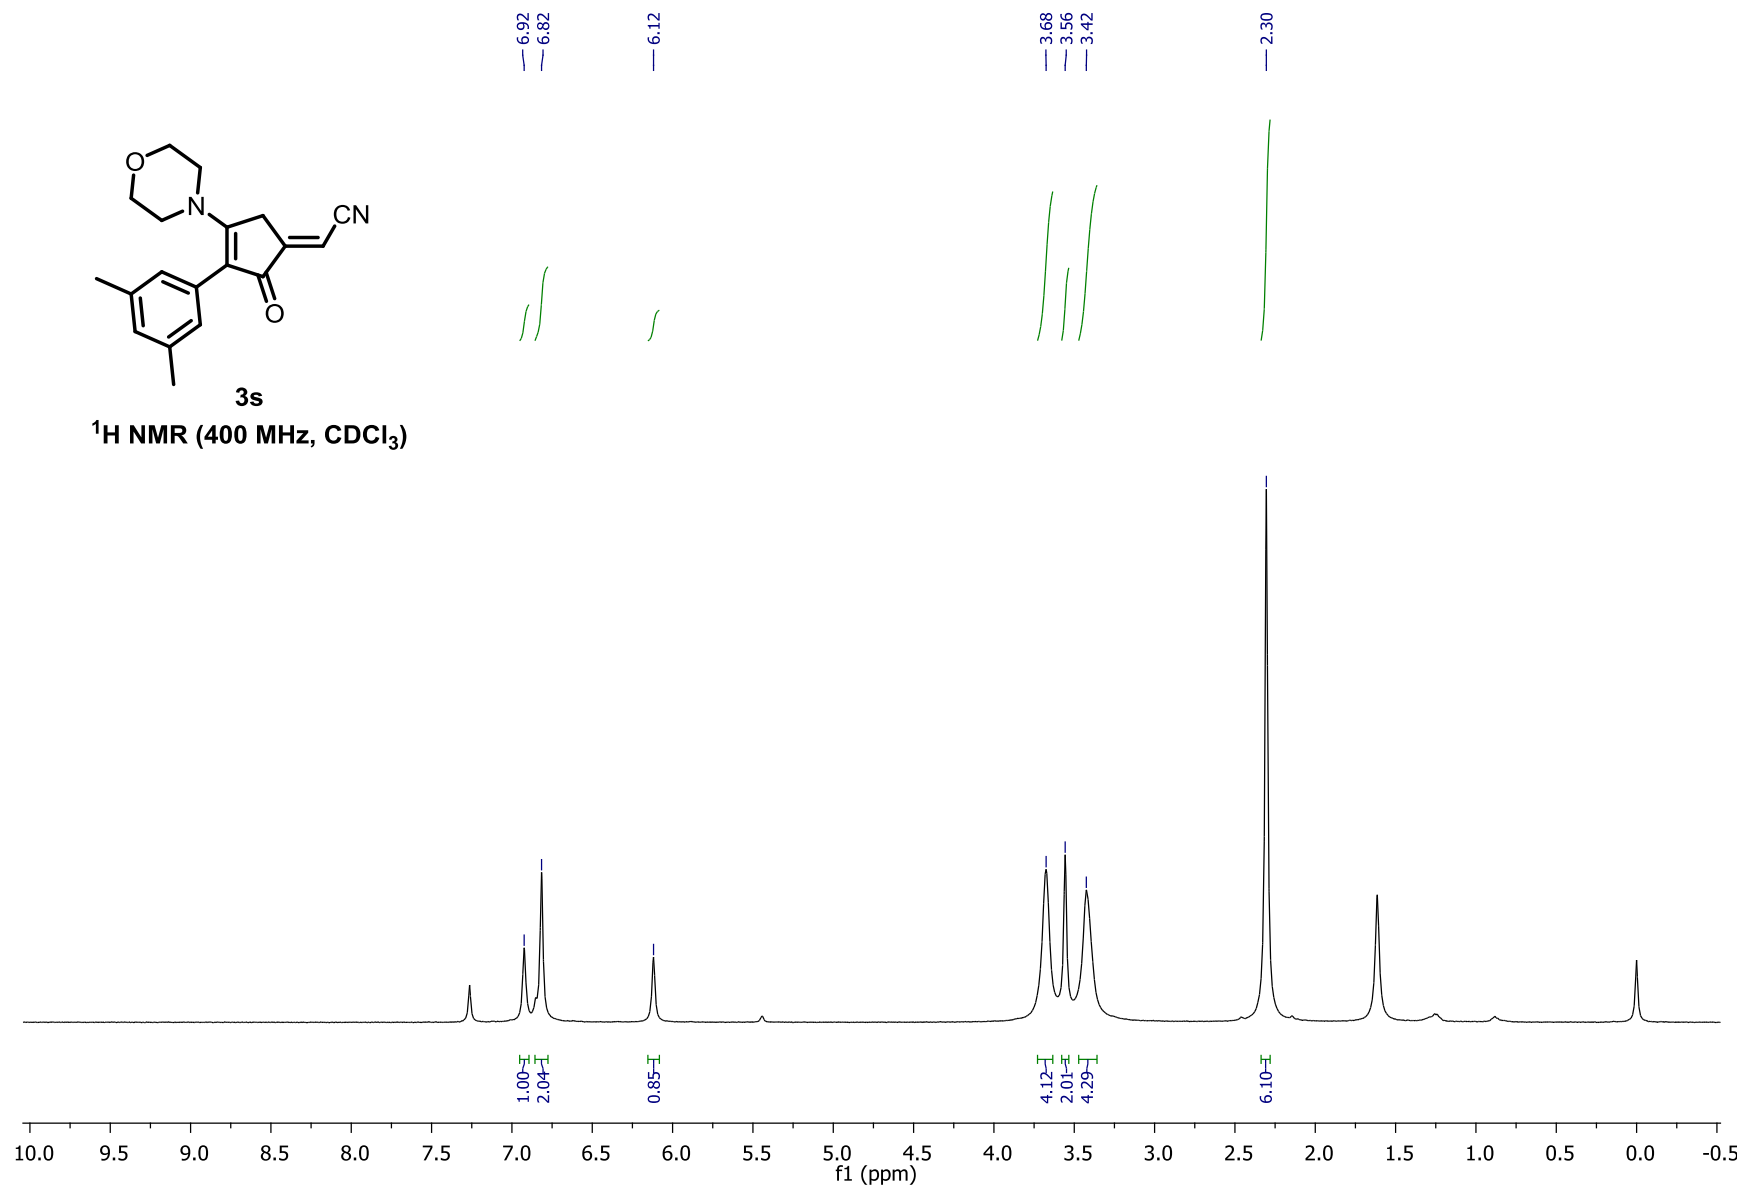

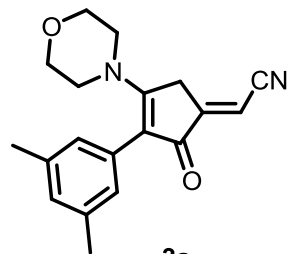

3s

<sup>13</sup>C NMR (100 MHz, CDCl<sub>3</sub>)

- 186.10
- 165.30
- 154.46
- ~ 138.06
- ~ 133.14
- ~ 129.51
- ~ 127.52
- ~ 118.64
- ~ 116.94
- 94.34
- 66.49
- 49.48
- 33.15
- 21.38

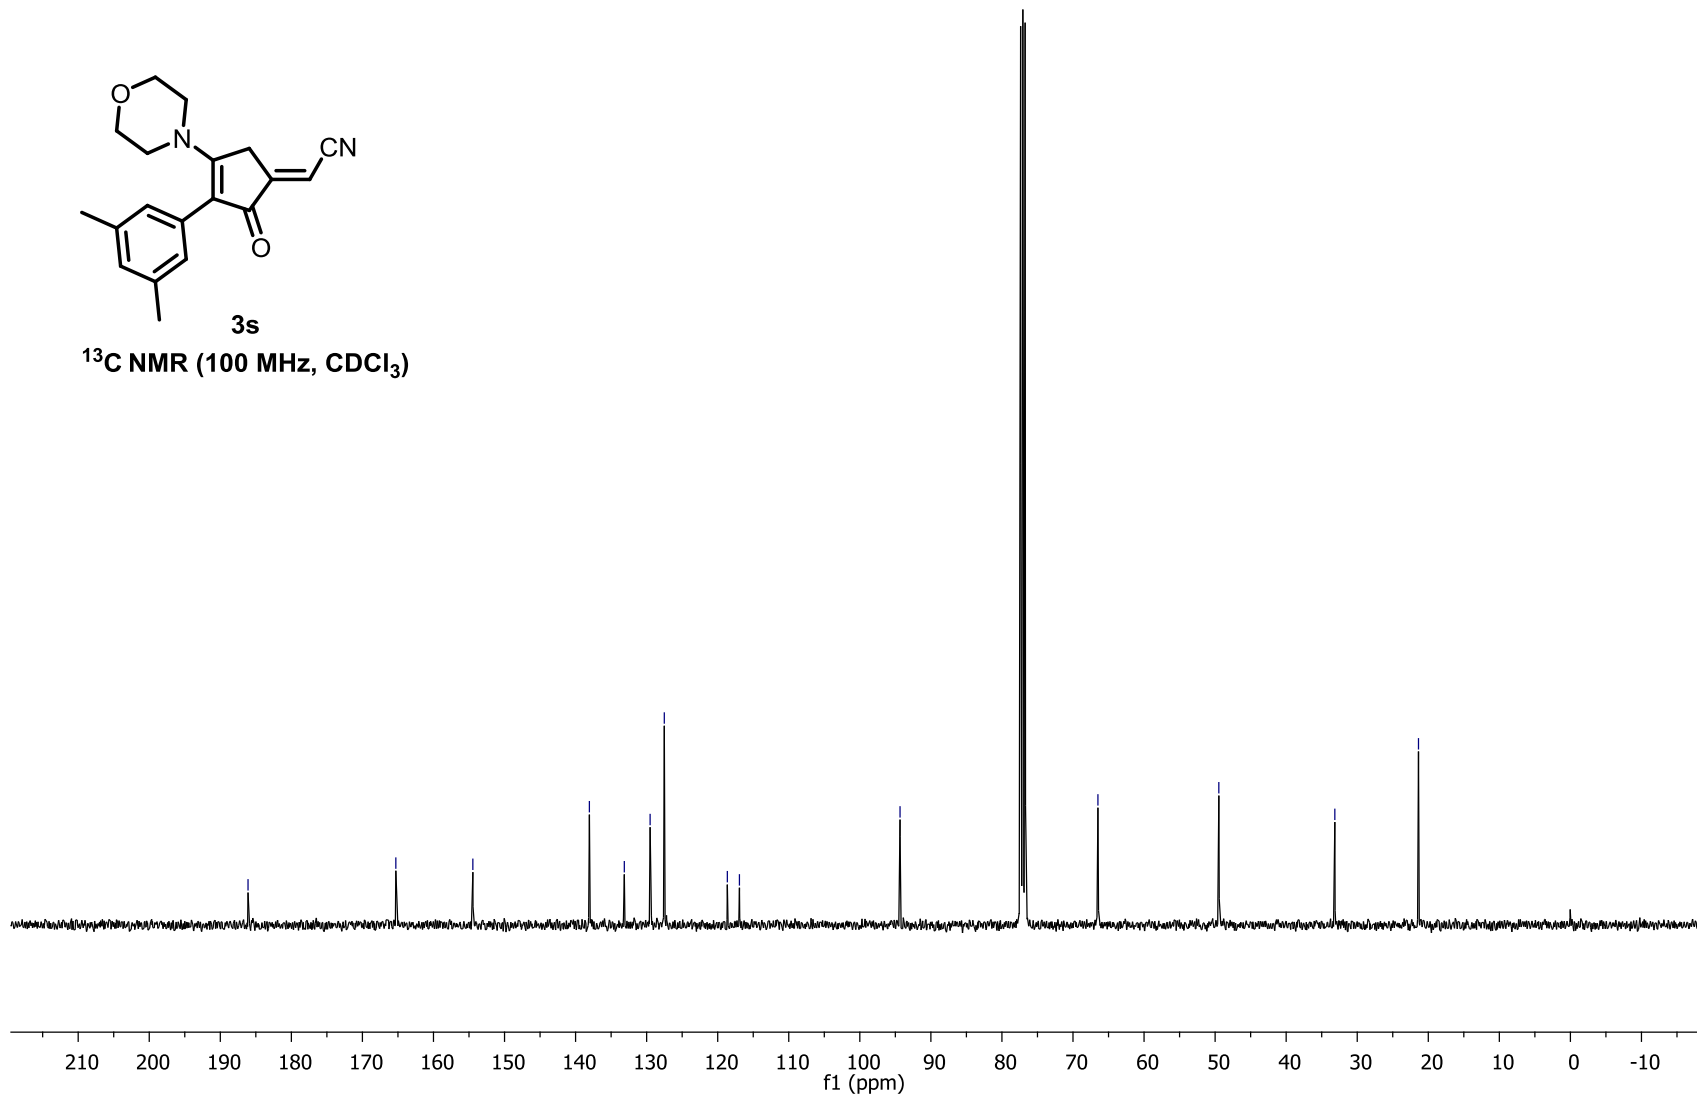

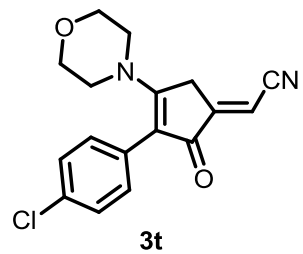

<sup>1</sup>H NMR (400 MHz, CDCl<sub>3</sub>)

7.37  
7.35  
7.18  
7.16  
6.13  
3.69  
3.58  
3.43

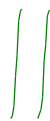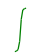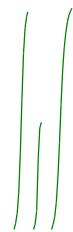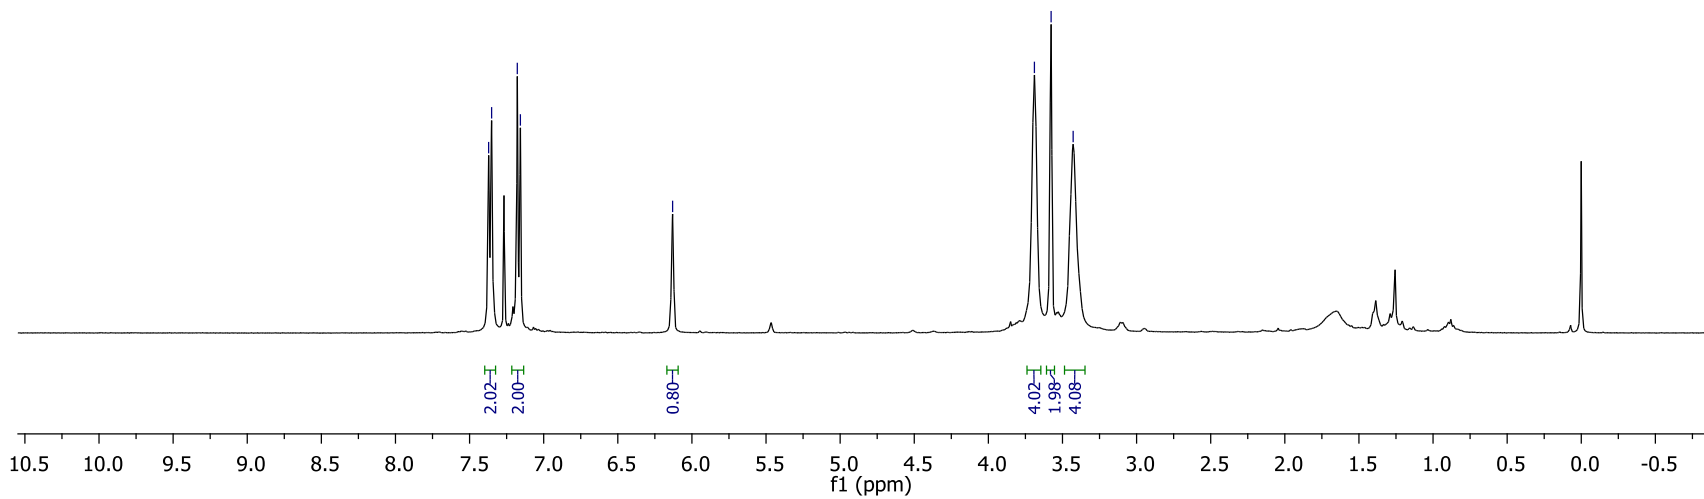



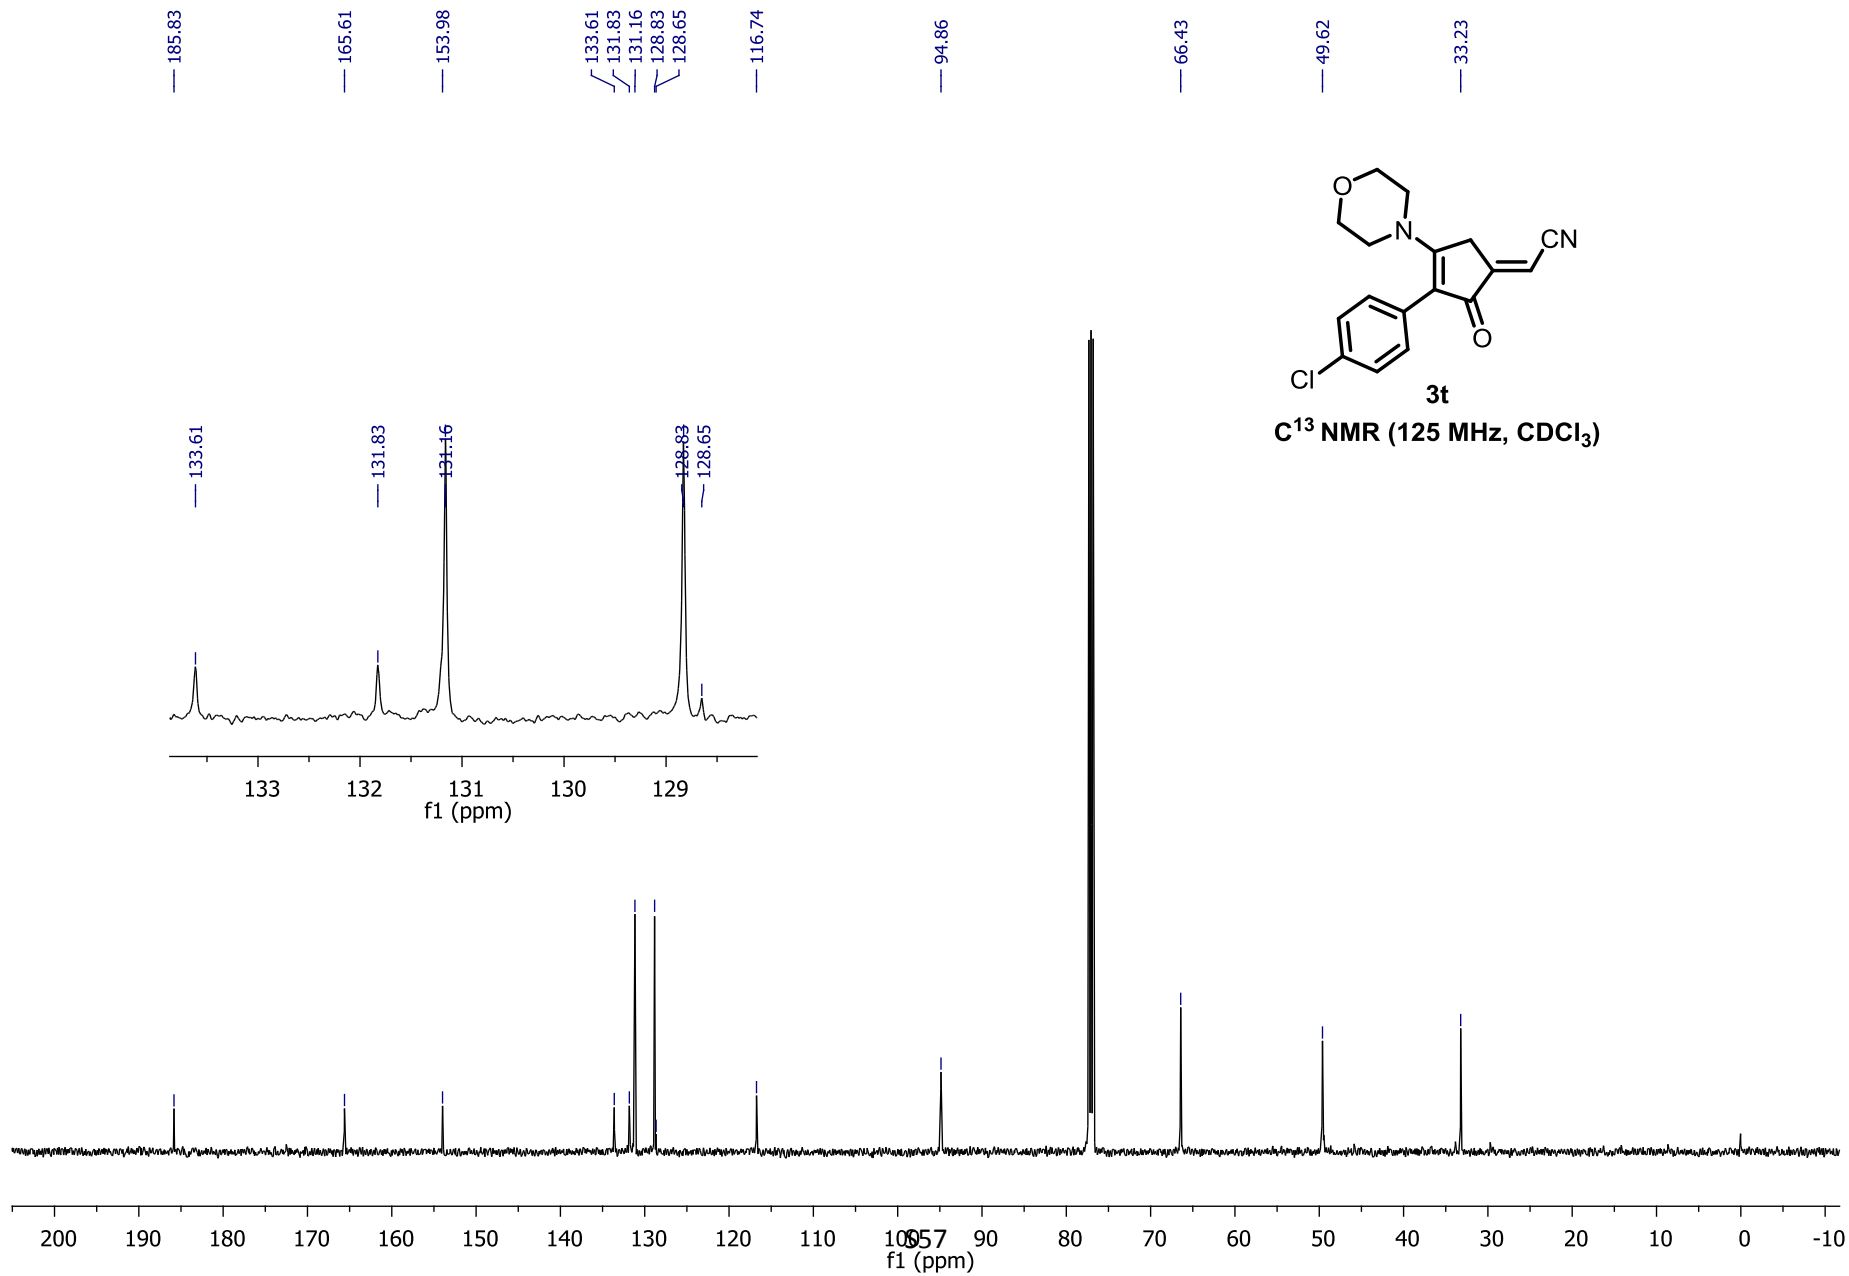

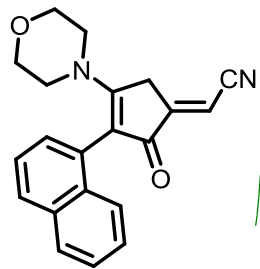

3u

<sup>1</sup>H NMR (500 MHz, DMSO-d<sub>6</sub>)

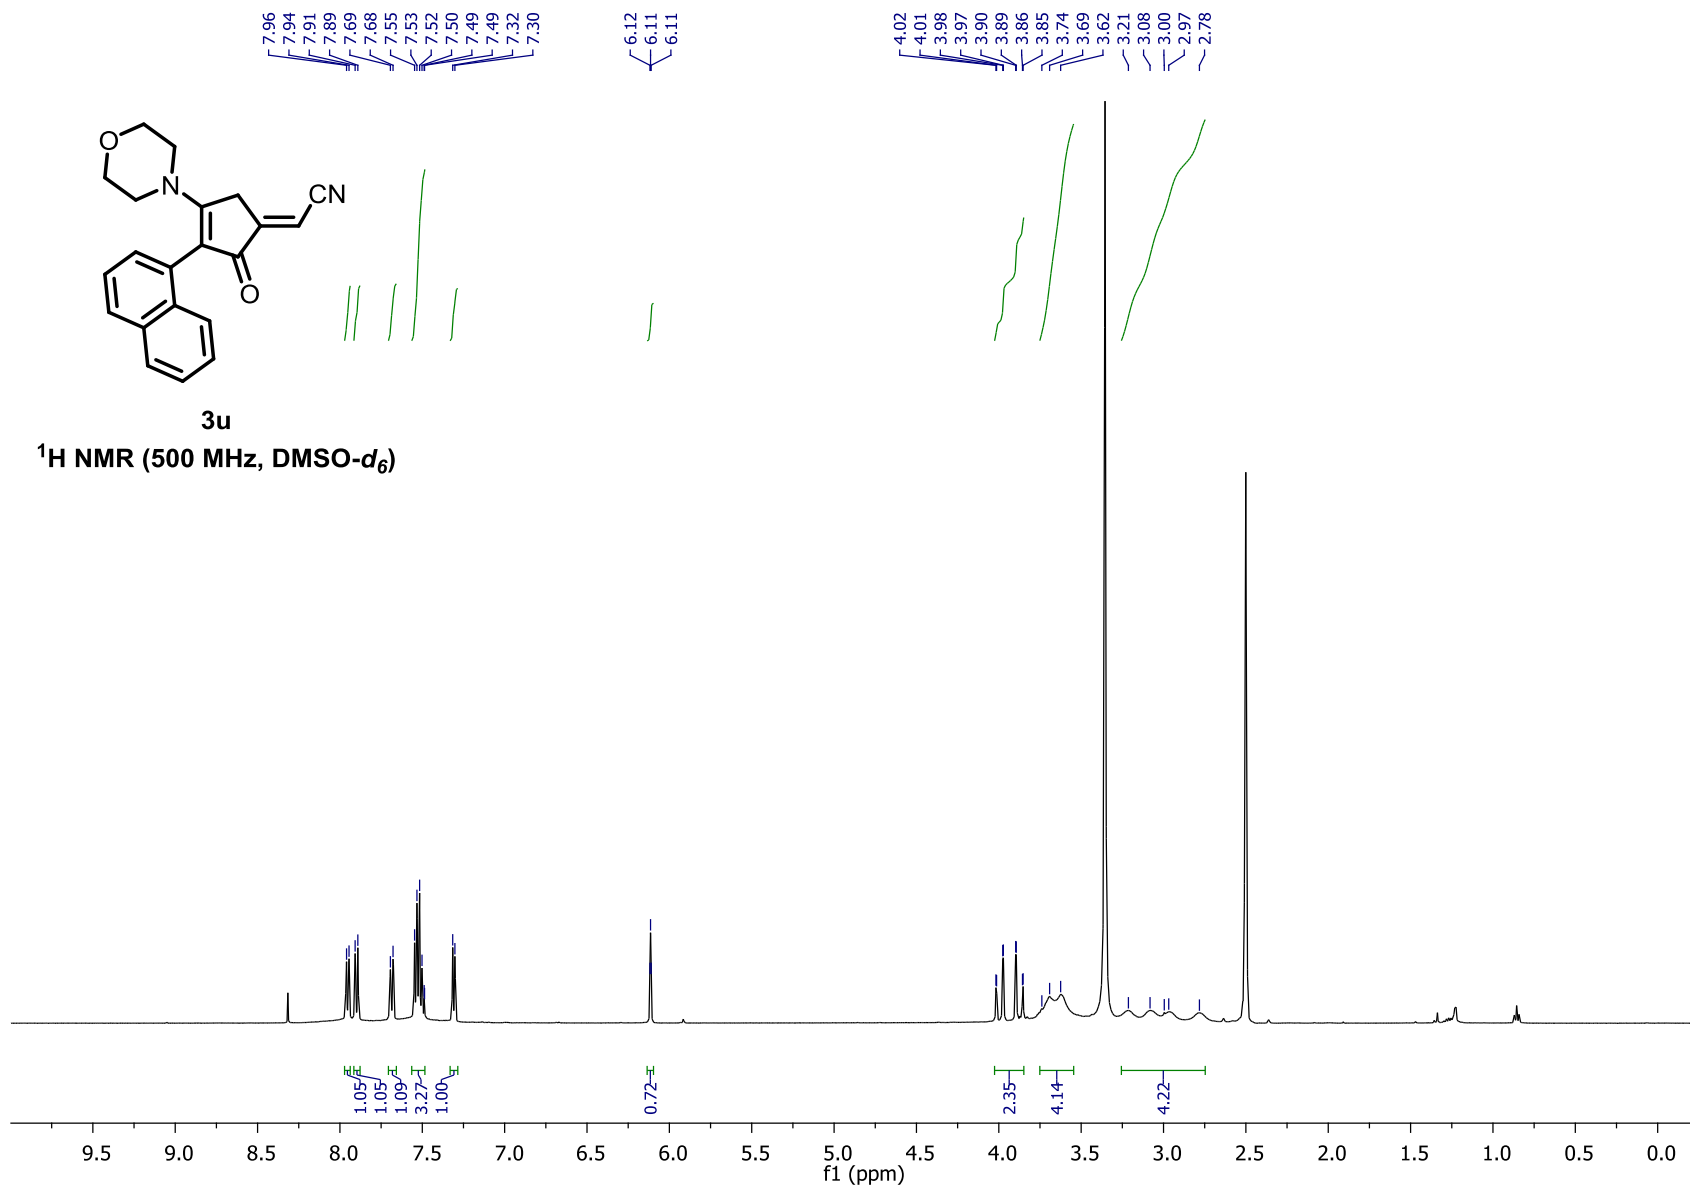

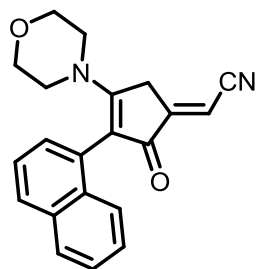

3u

<sup>13</sup>C NMR (100 MHz, DMSO-d<sub>6</sub>)

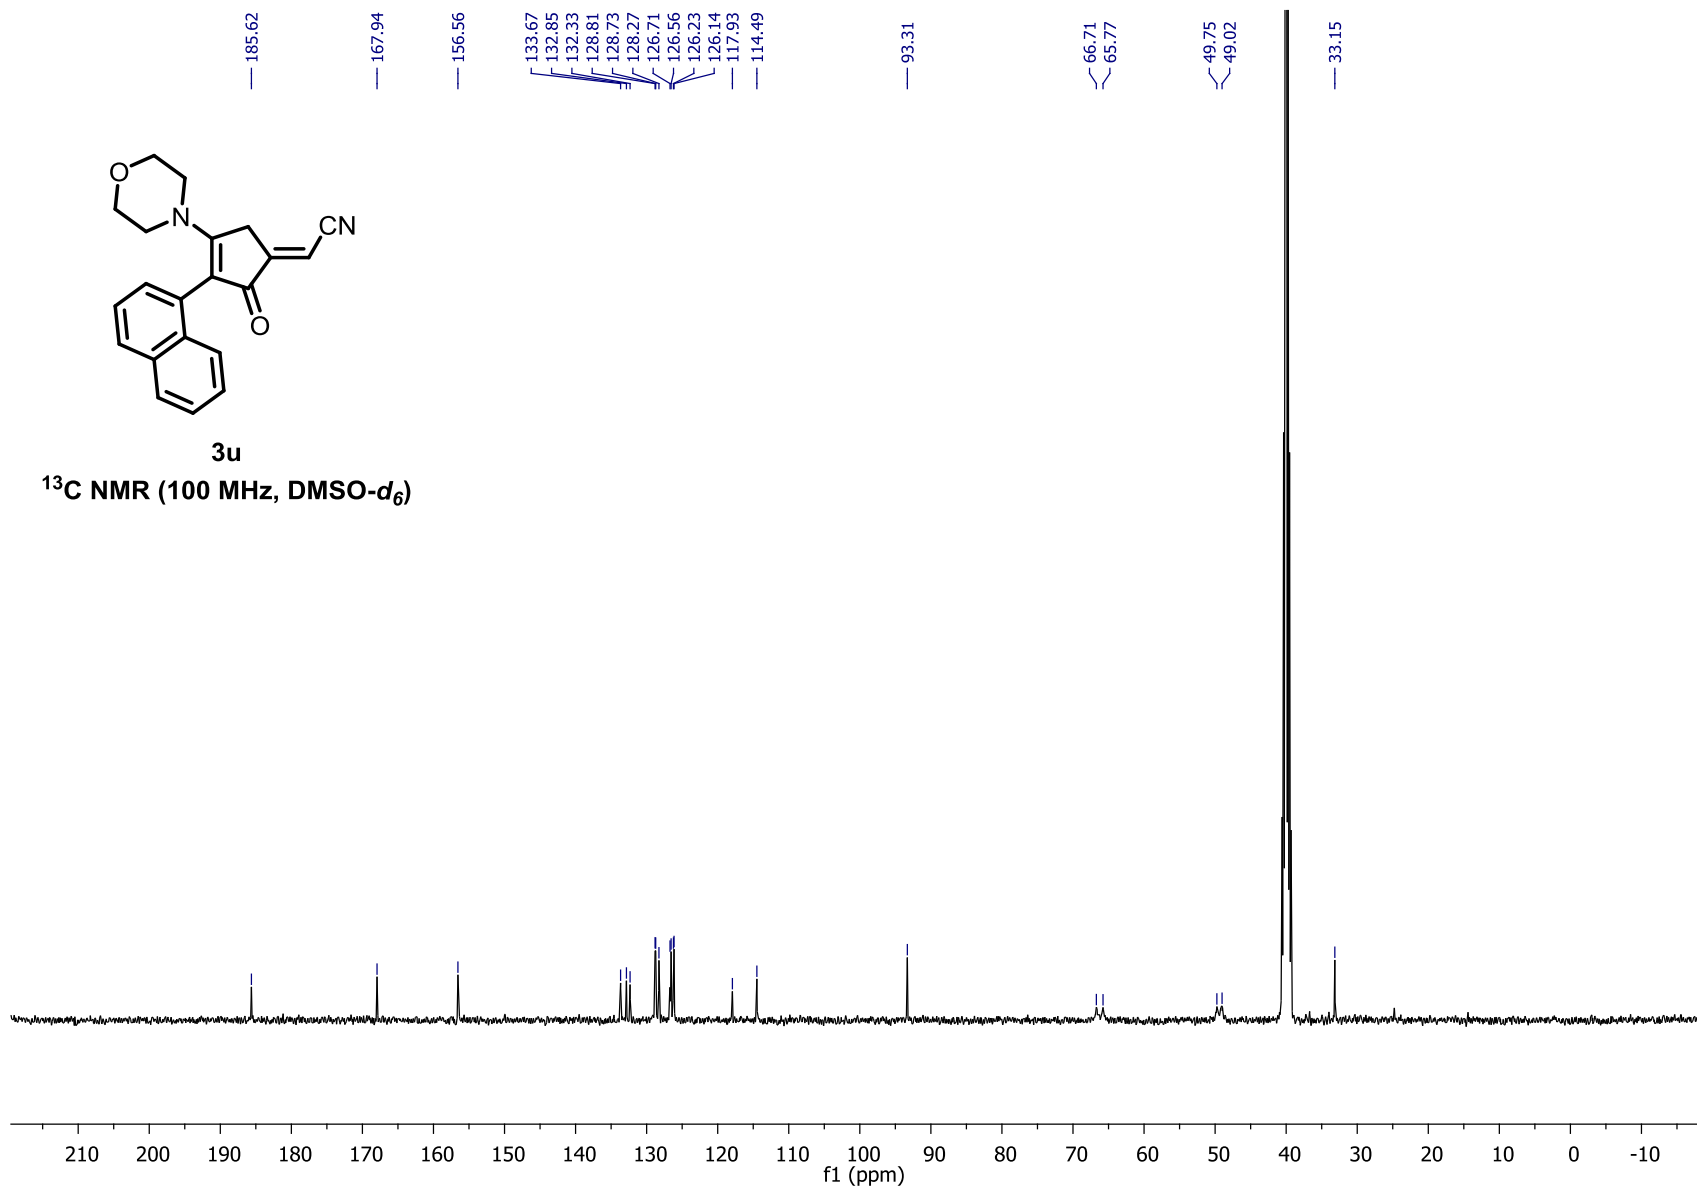

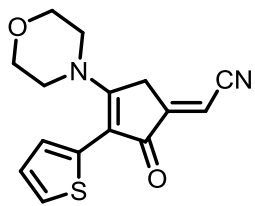

3v

<sup>1</sup>H NMR (500 MHz, CDCl<sub>3</sub>)

7.38  
7.38  
7.37  
7.37  
7.07  
7.06  
7.06  
7.05  
6.91  
6.91  
6.91  
6.14  
3.74  
3.73  
3.72  
3.58  
3.57  
3.53  
3.52  
3.51

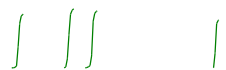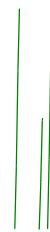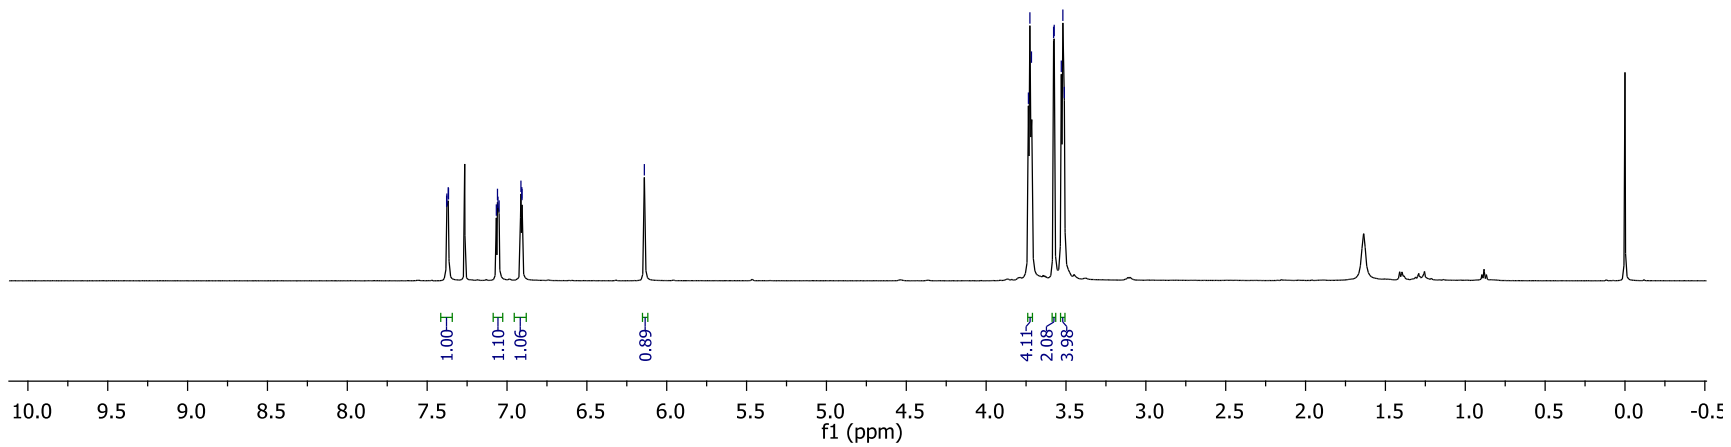

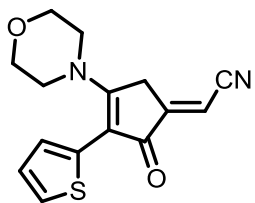

3v

<sup>13</sup>C NMR (100 MHz, CDCl<sub>3</sub>)

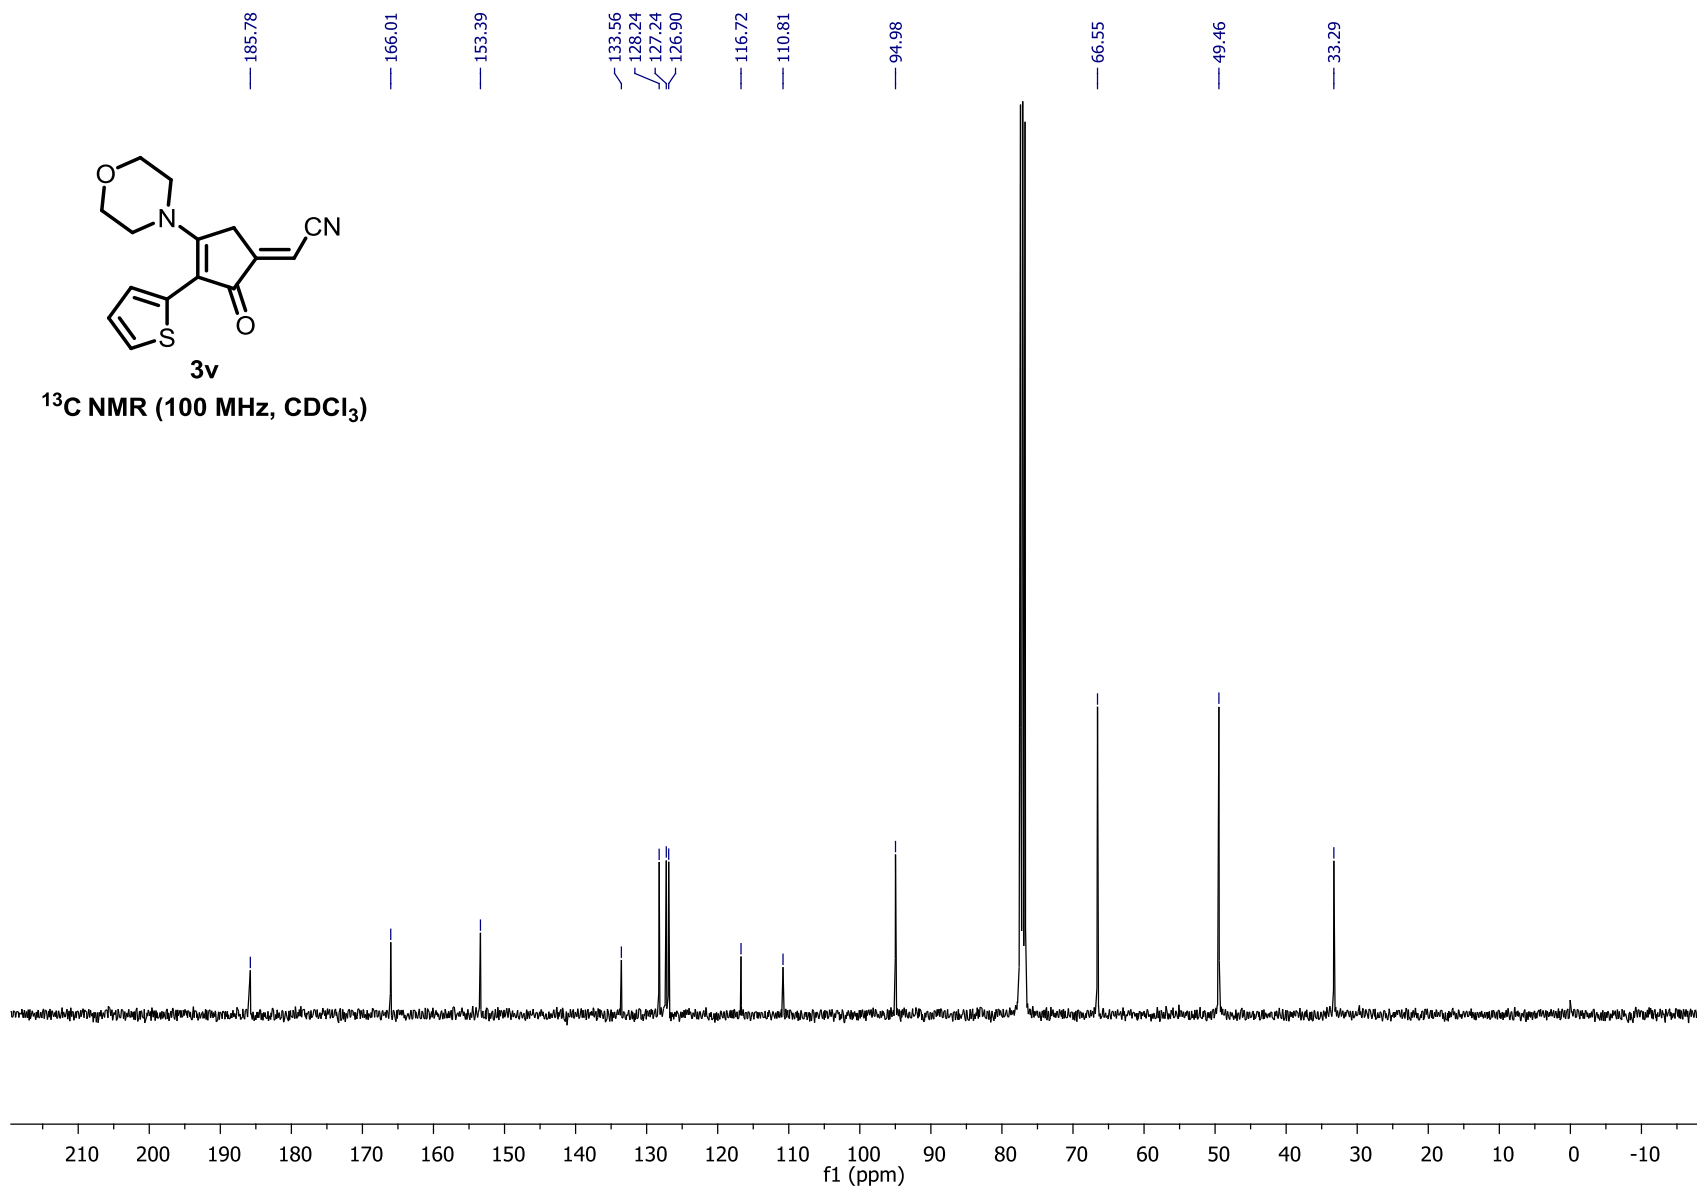

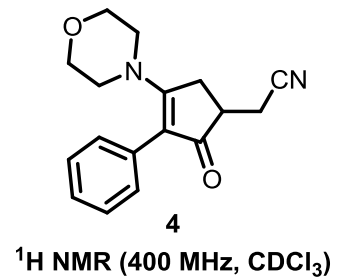

7.37  
7.35  
7.33  
7.28  
7.26  
7.26  
7.24  
7.19  
7.18  
7.17

3.66  
3.64  
3.63  
3.35  
3.34  
3.33  
3.08  
3.07  
3.04  
3.02  
2.99  
2.97  
2.94  
2.93  
2.89  
2.88  
2.87  
2.86  
2.85  
2.84  
2.61  
2.60  
2.58  
2.57  
2.56  
2.56  
2.54  
2.51

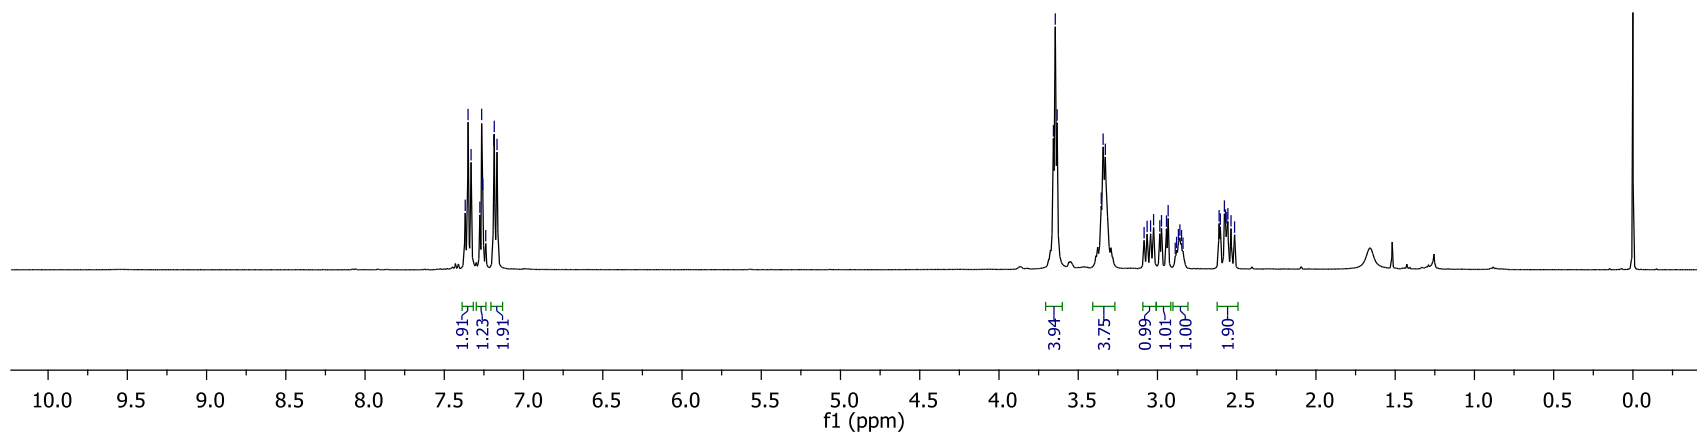

— 198.99 — 168.72 — 133.92 — 130.18 — 128.44 — 127.29 — 118.36 — 113.58 — 66.44 — 48.99 — 39.85 — 33.40 — 20.05

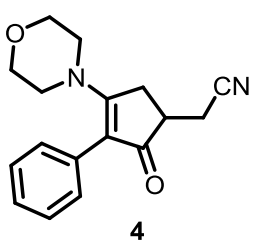

<sup>13</sup>C NMR (100 MHz, CDCl<sub>3</sub>)

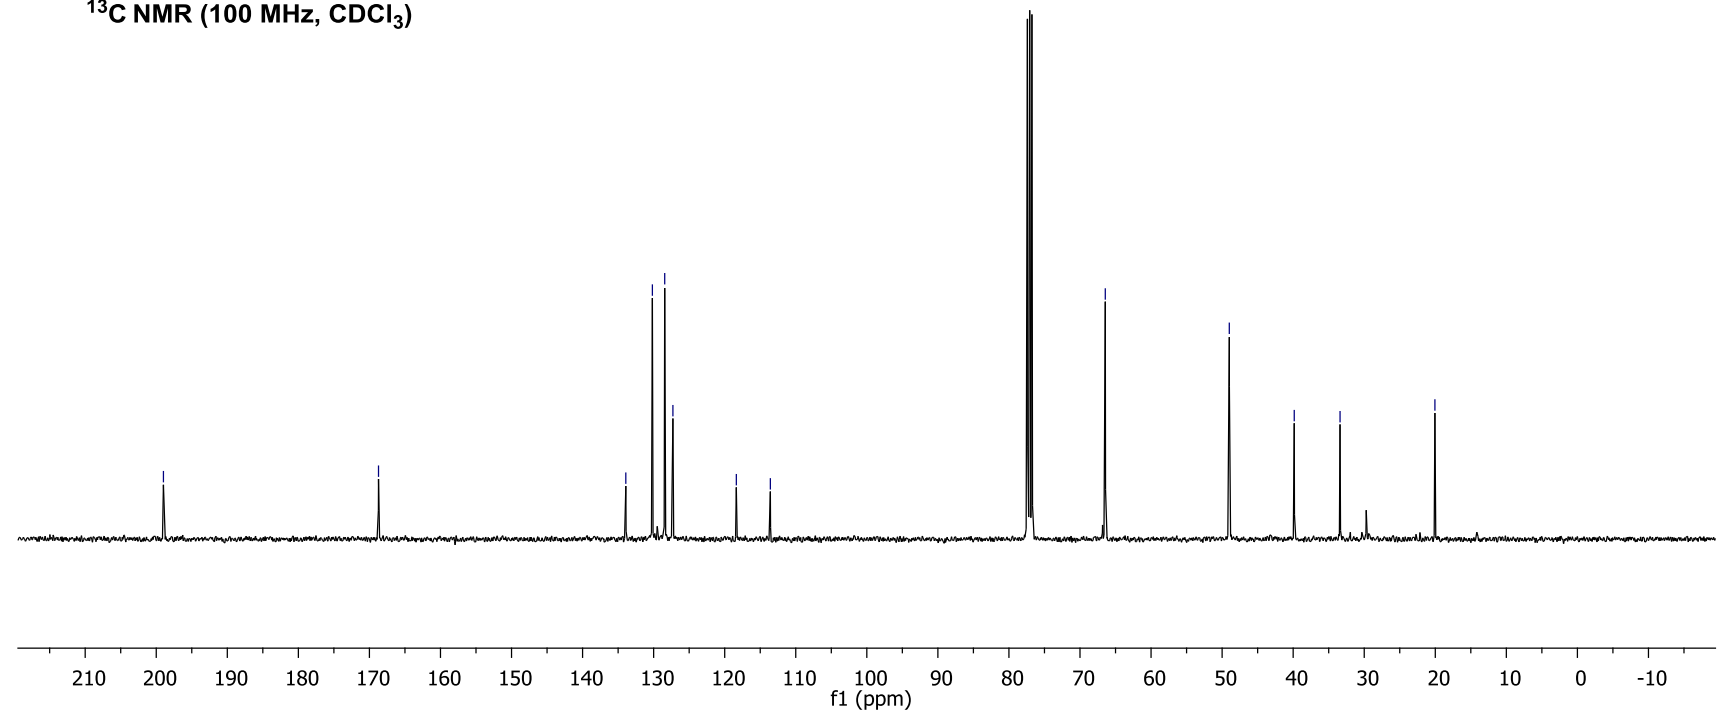

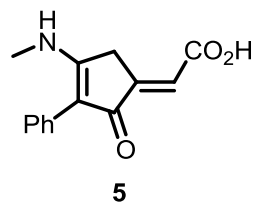

<sup>1</sup>H NMR (500 MHz, CDCl<sub>3</sub>)

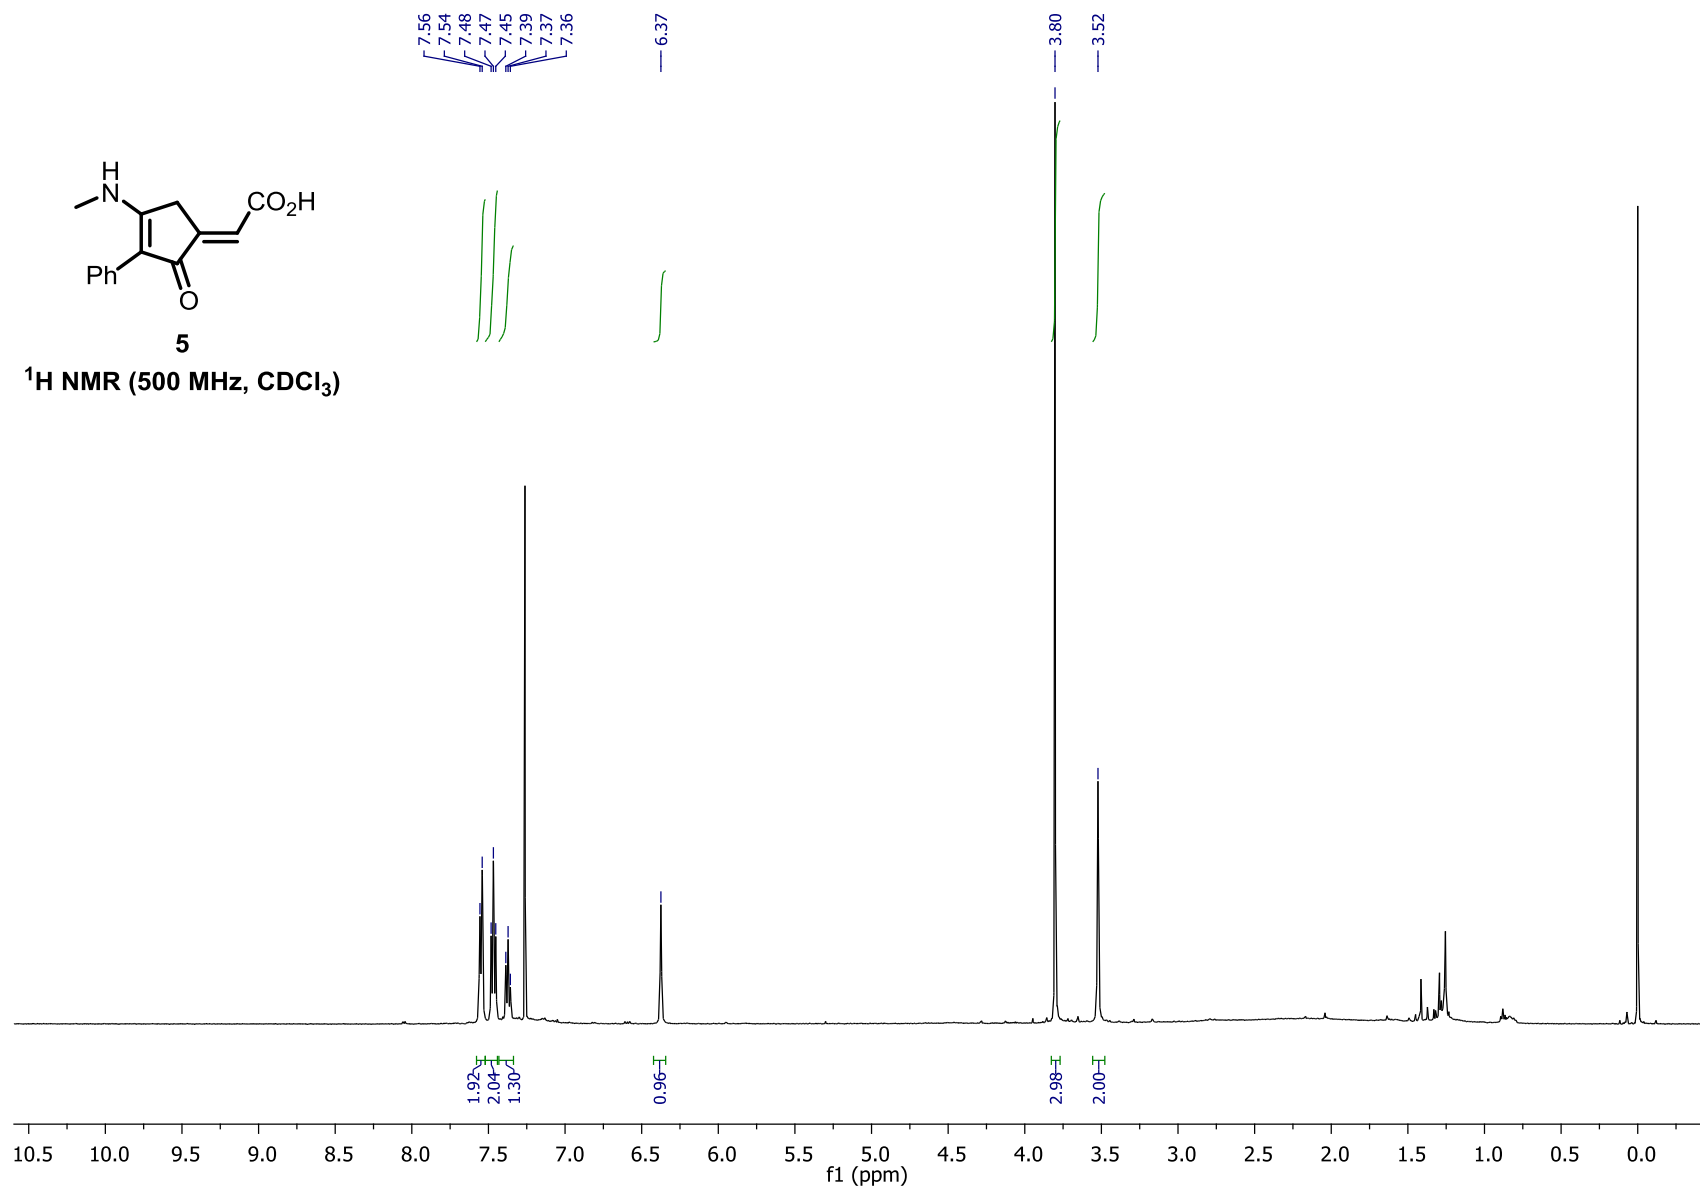



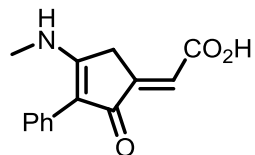

5

<sup>13</sup>C NMR (101 MHz, CDCl<sub>3</sub>+ DMSO-*d*<sub>6</sub>)

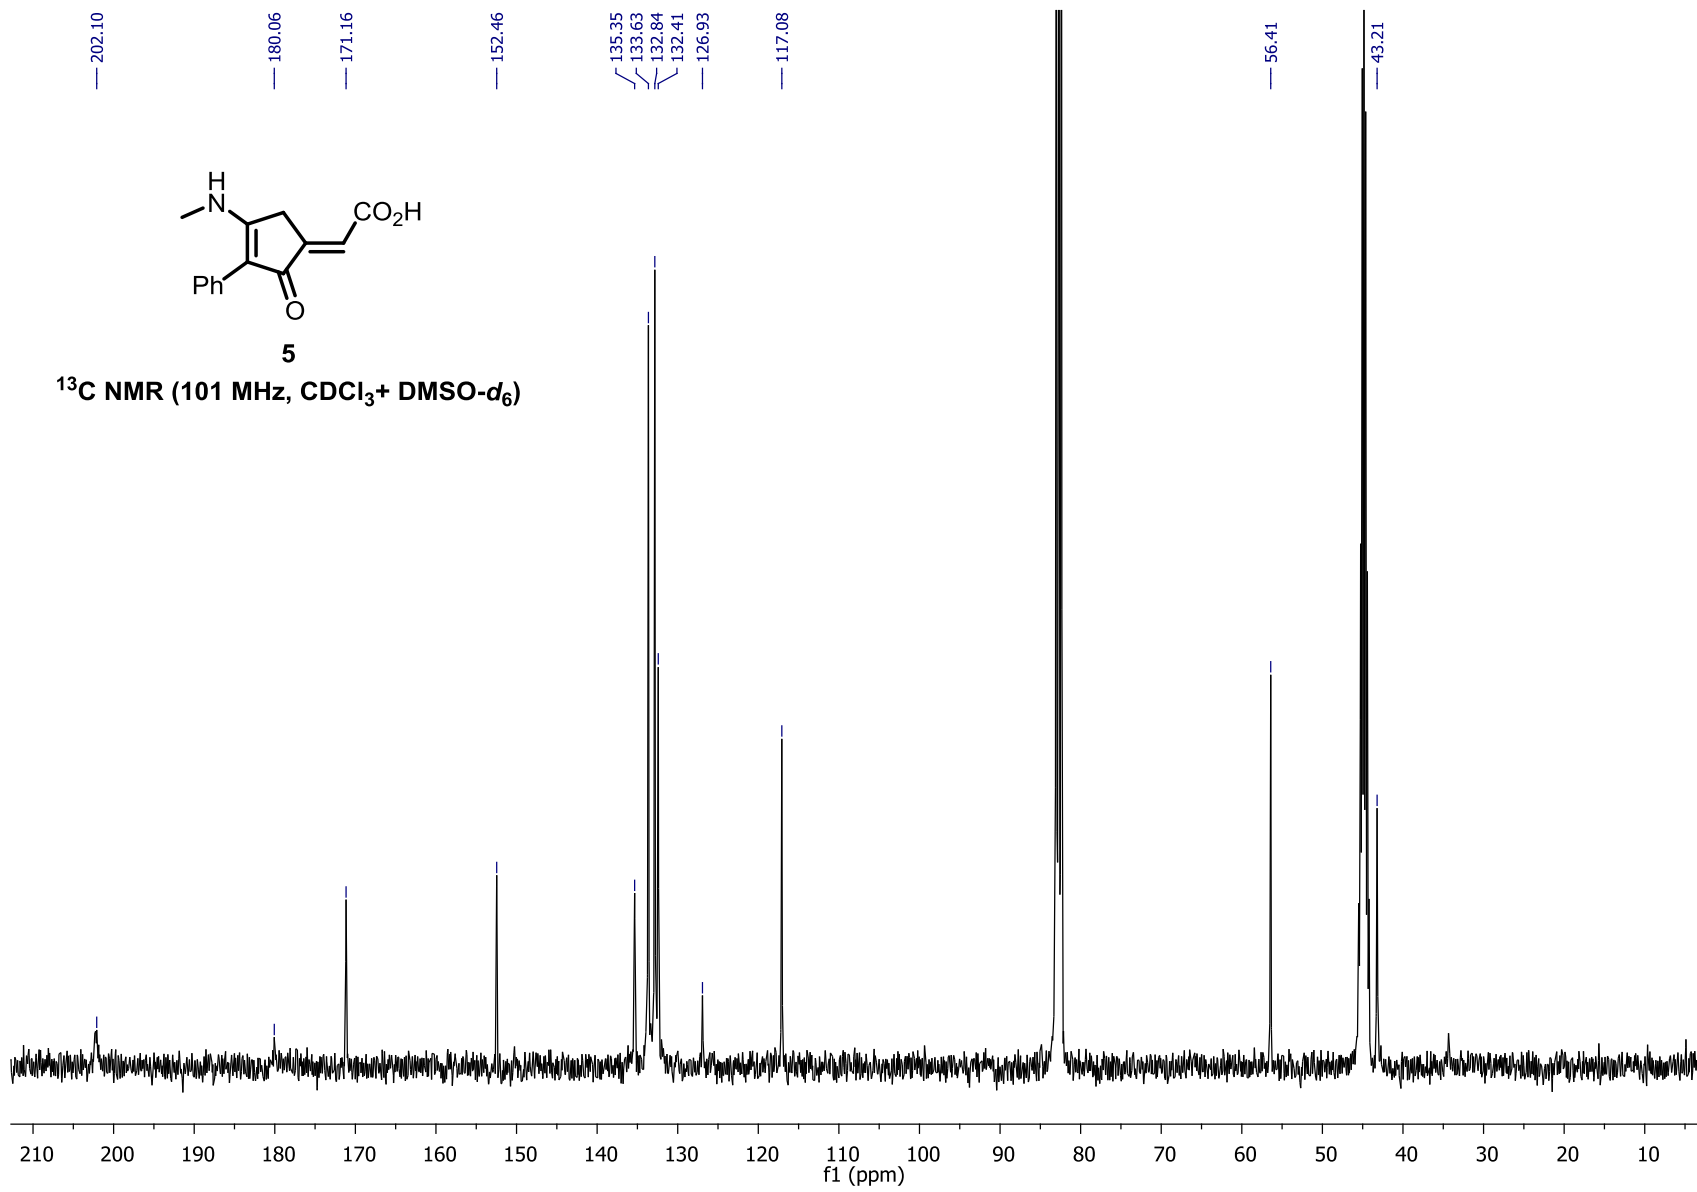

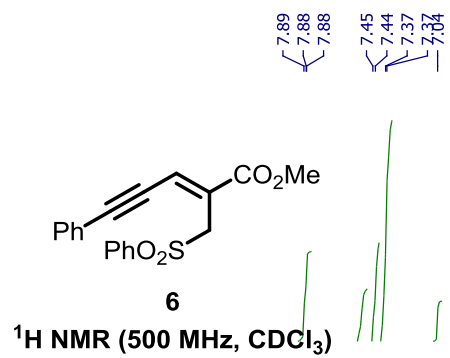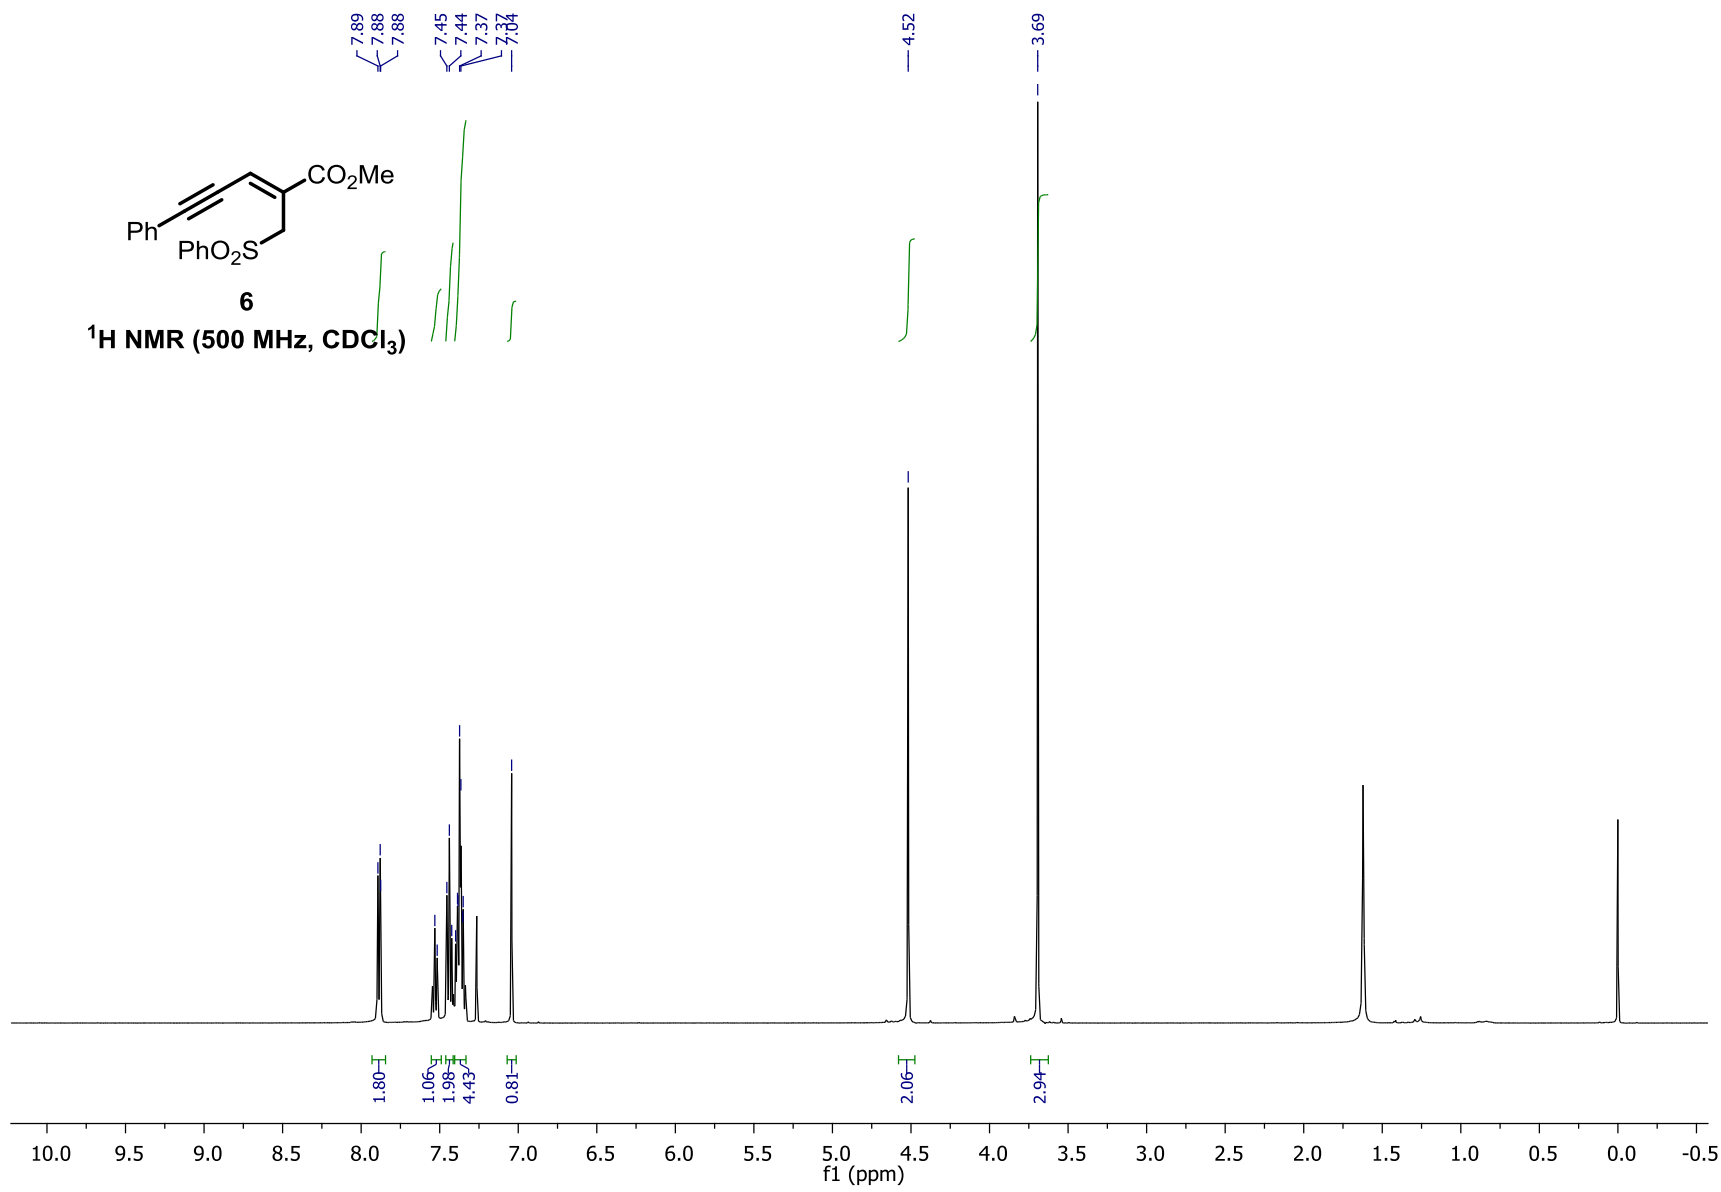

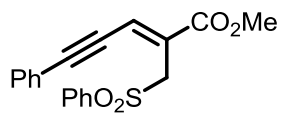

**6**

<sup>13</sup>C NMR (125 MHz, CDCl<sub>3</sub>)

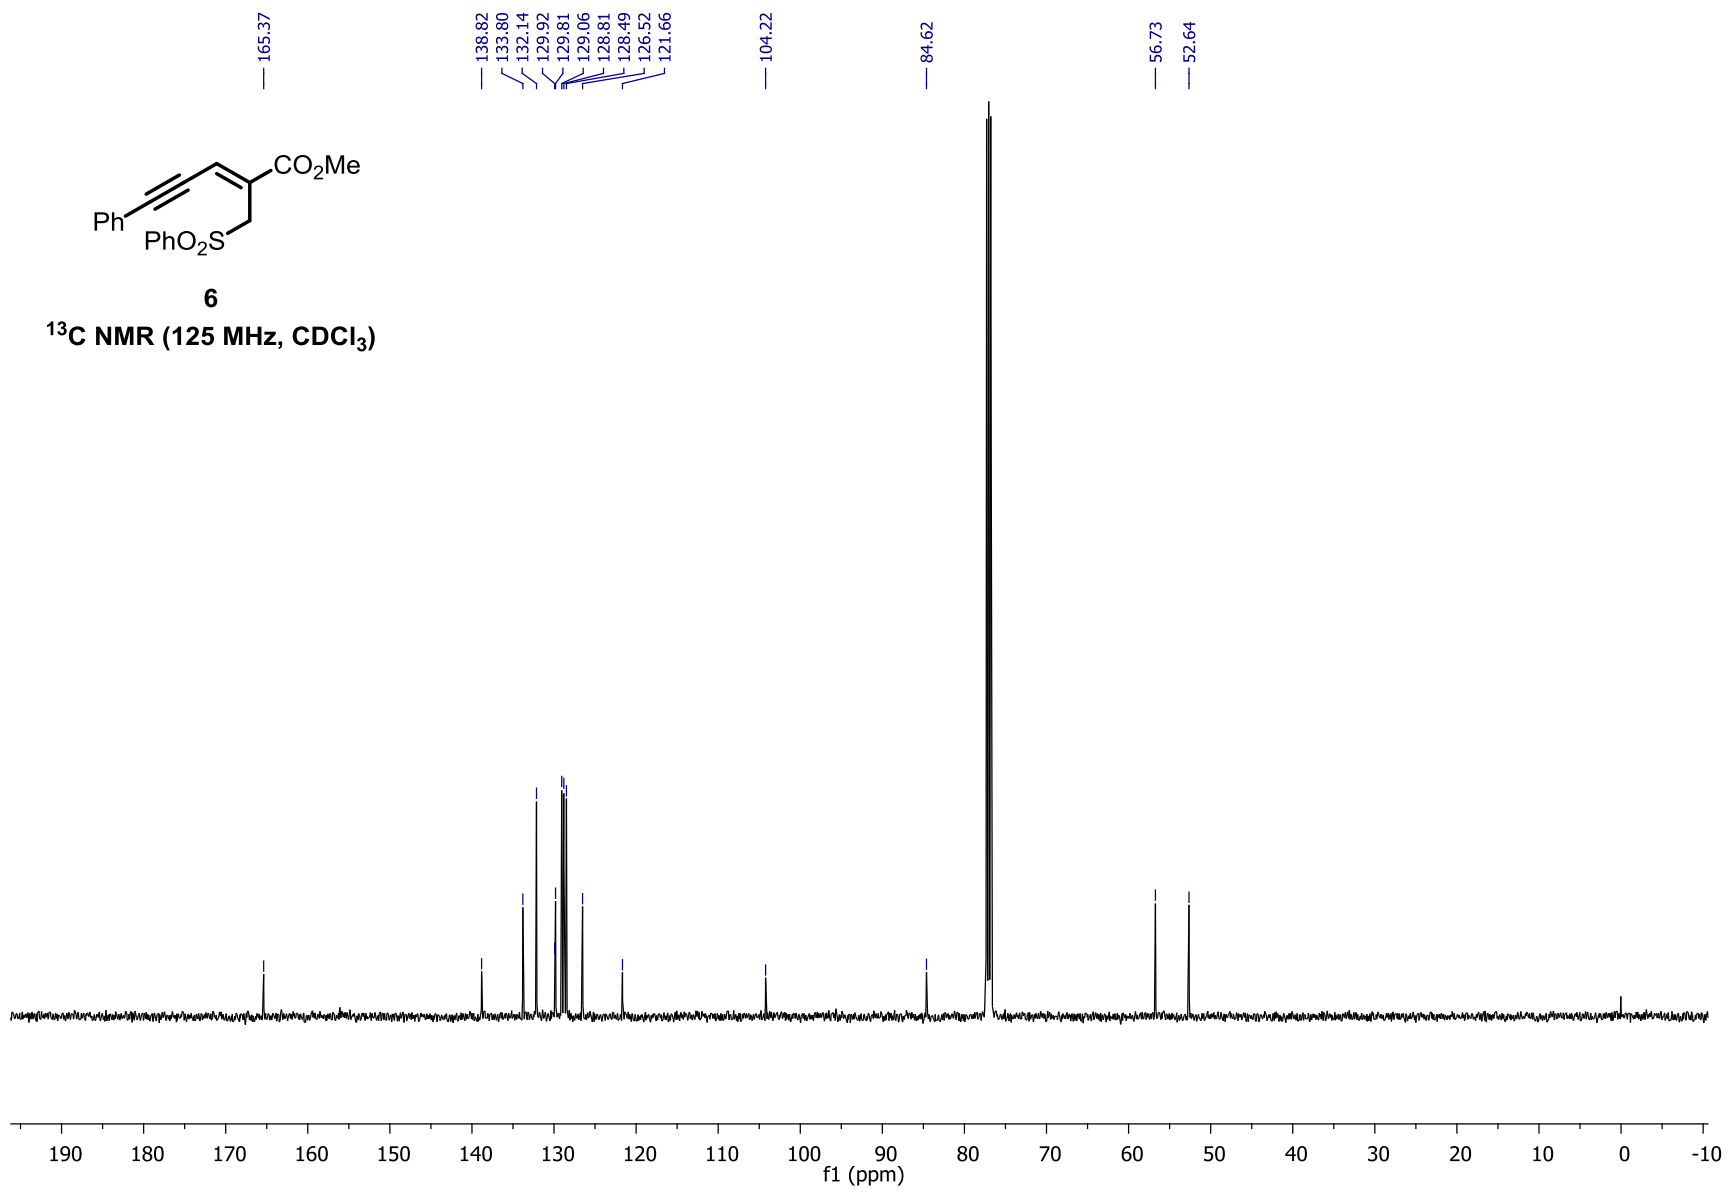

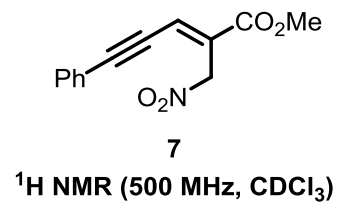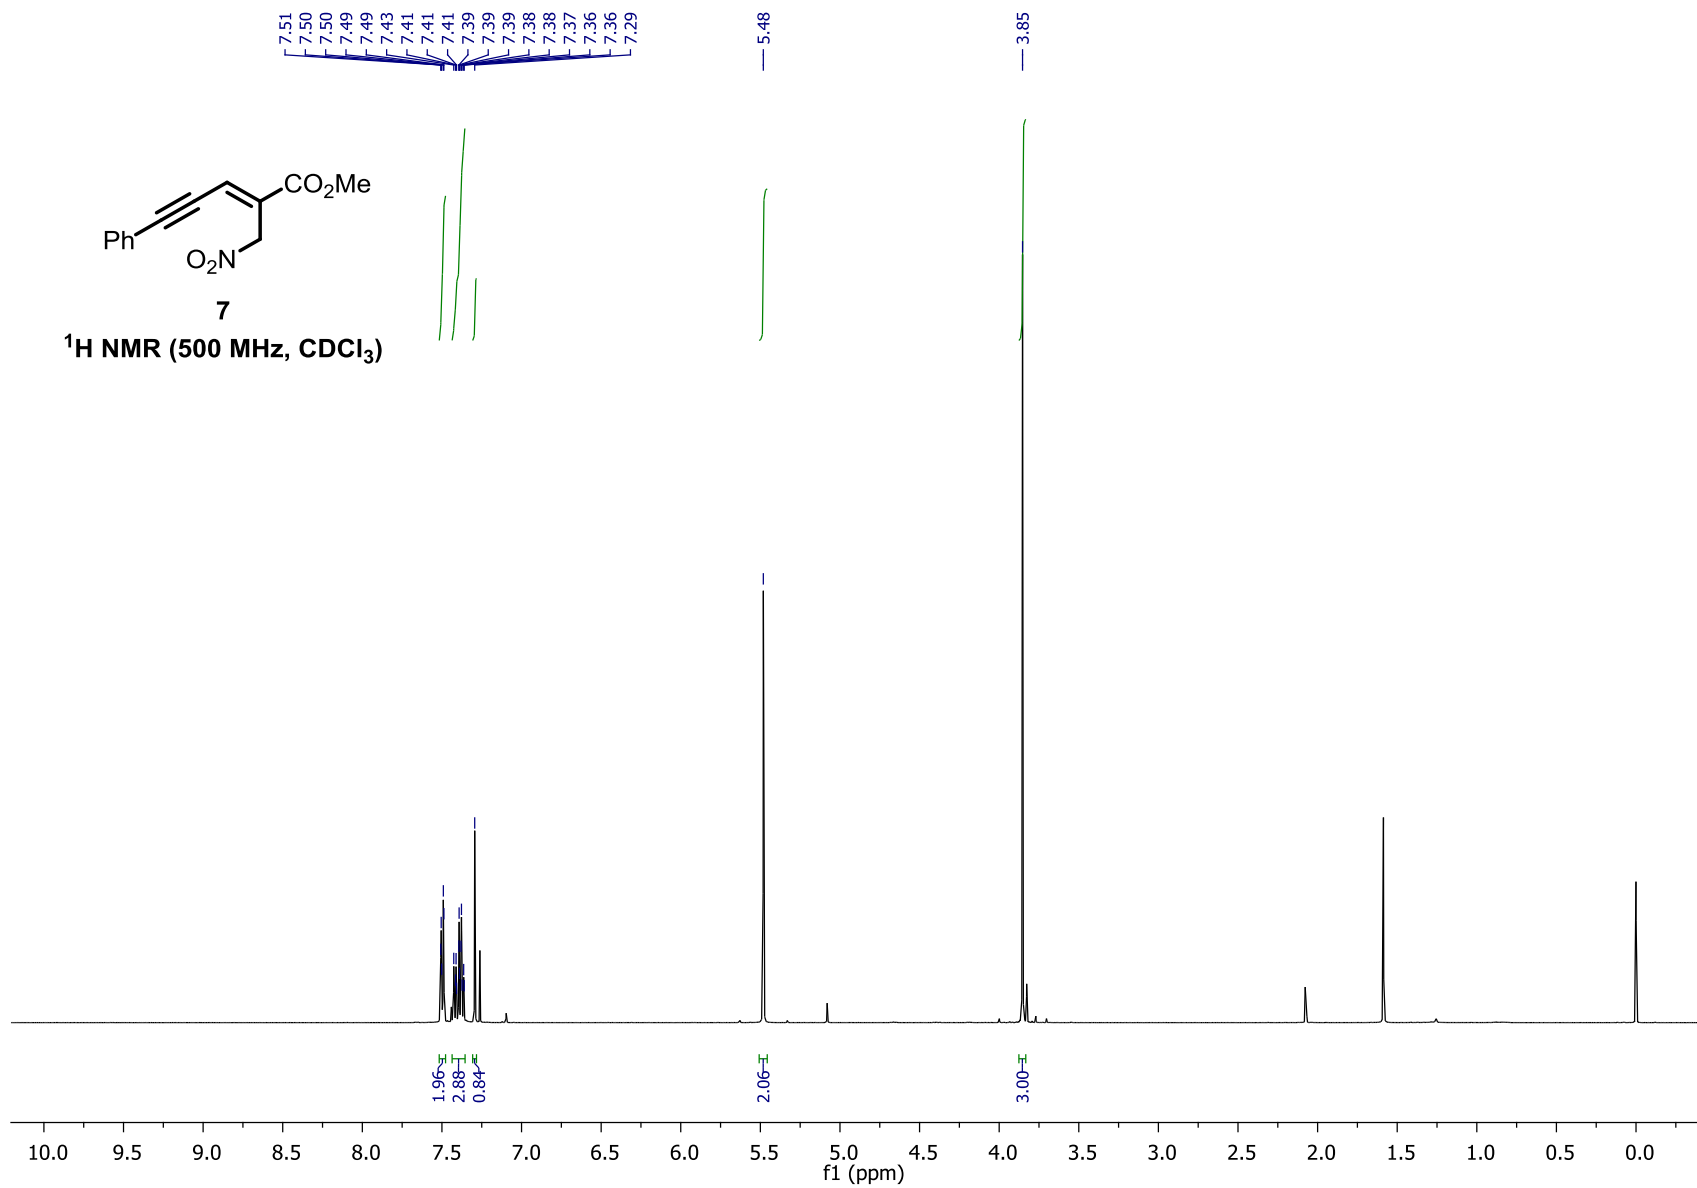

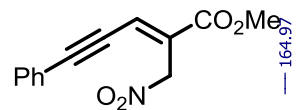

7

<sup>13</sup>C NMR (100 MHz, CDCl<sub>3</sub>)

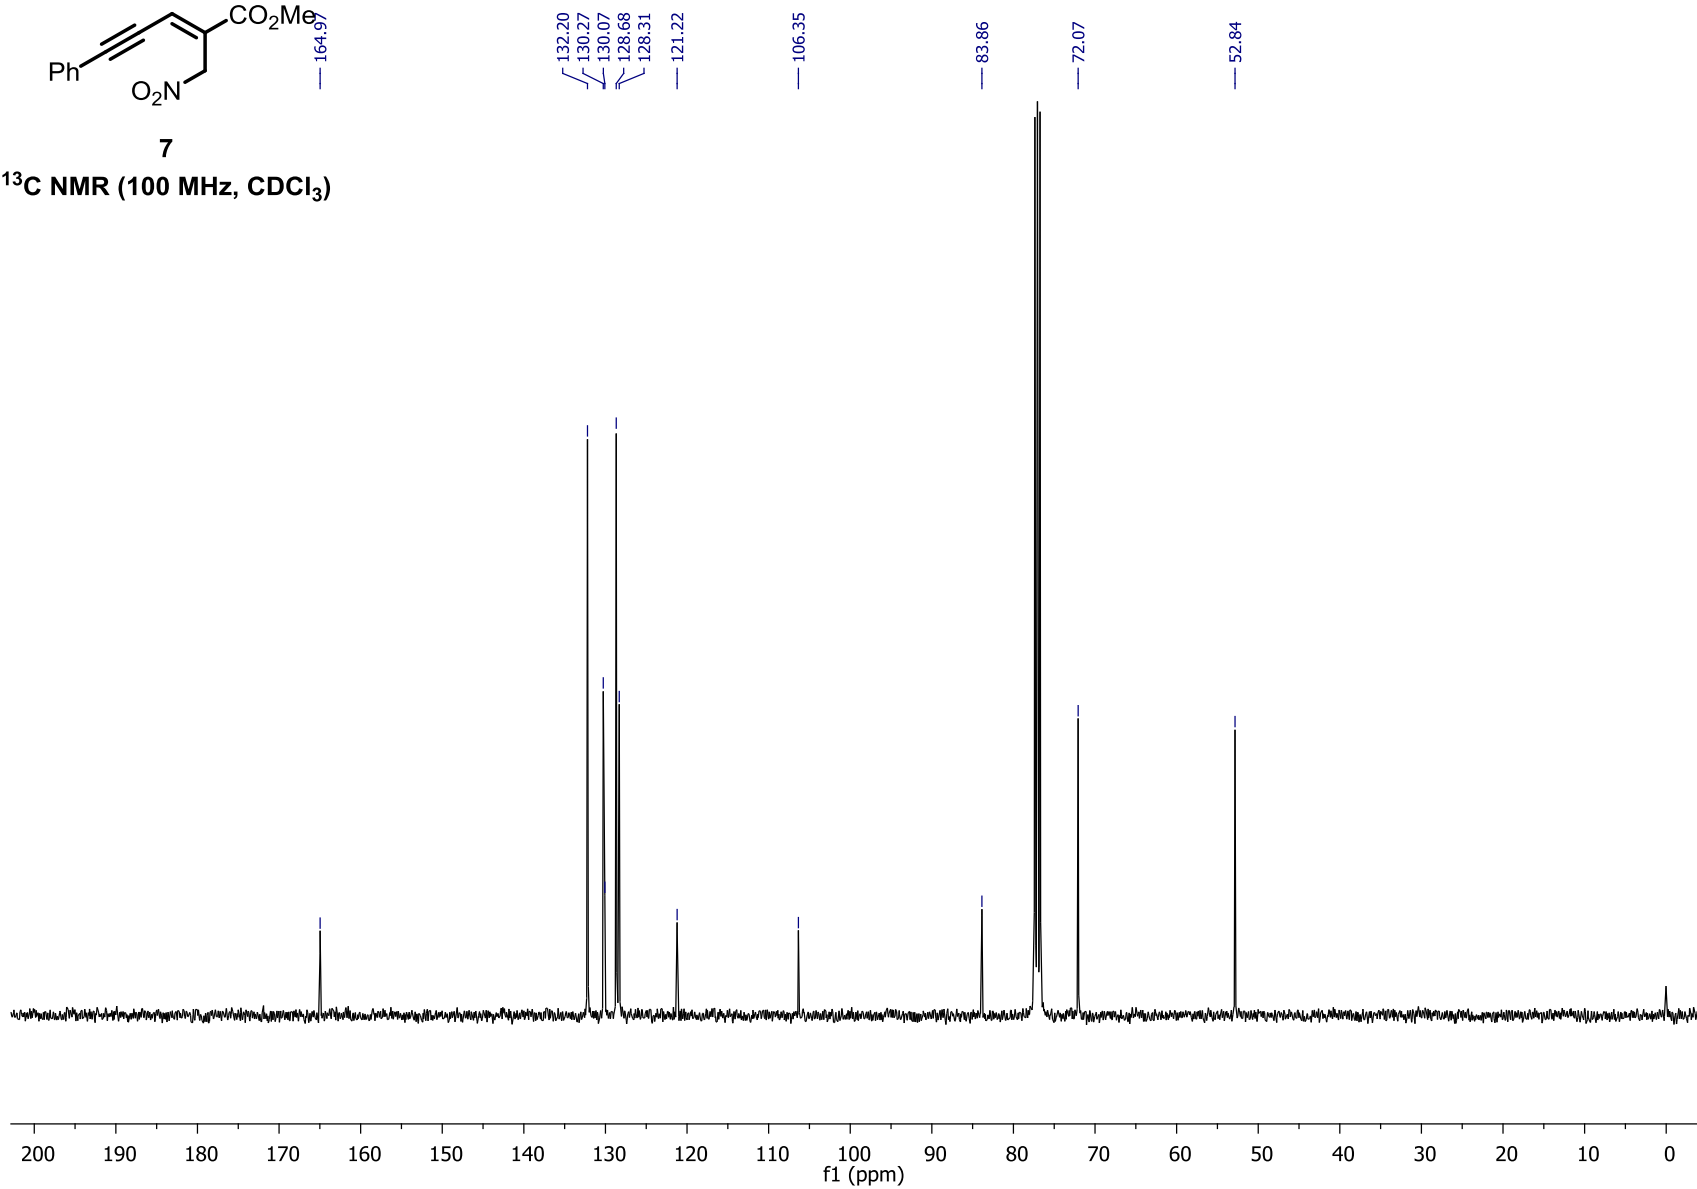

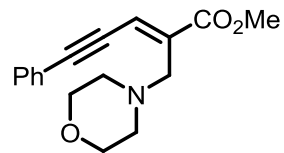

8

$^1\text{H NMR}$  (500 MHz,  $\text{CDCl}_3$ )

7.49  
7.49  
7.48  
7.47  
7.39  
7.38  
7.36  
7.35  
7.34  
6.99

3.81  
3.70  
3.69  
3.52

2.59  
2.58  
2.57

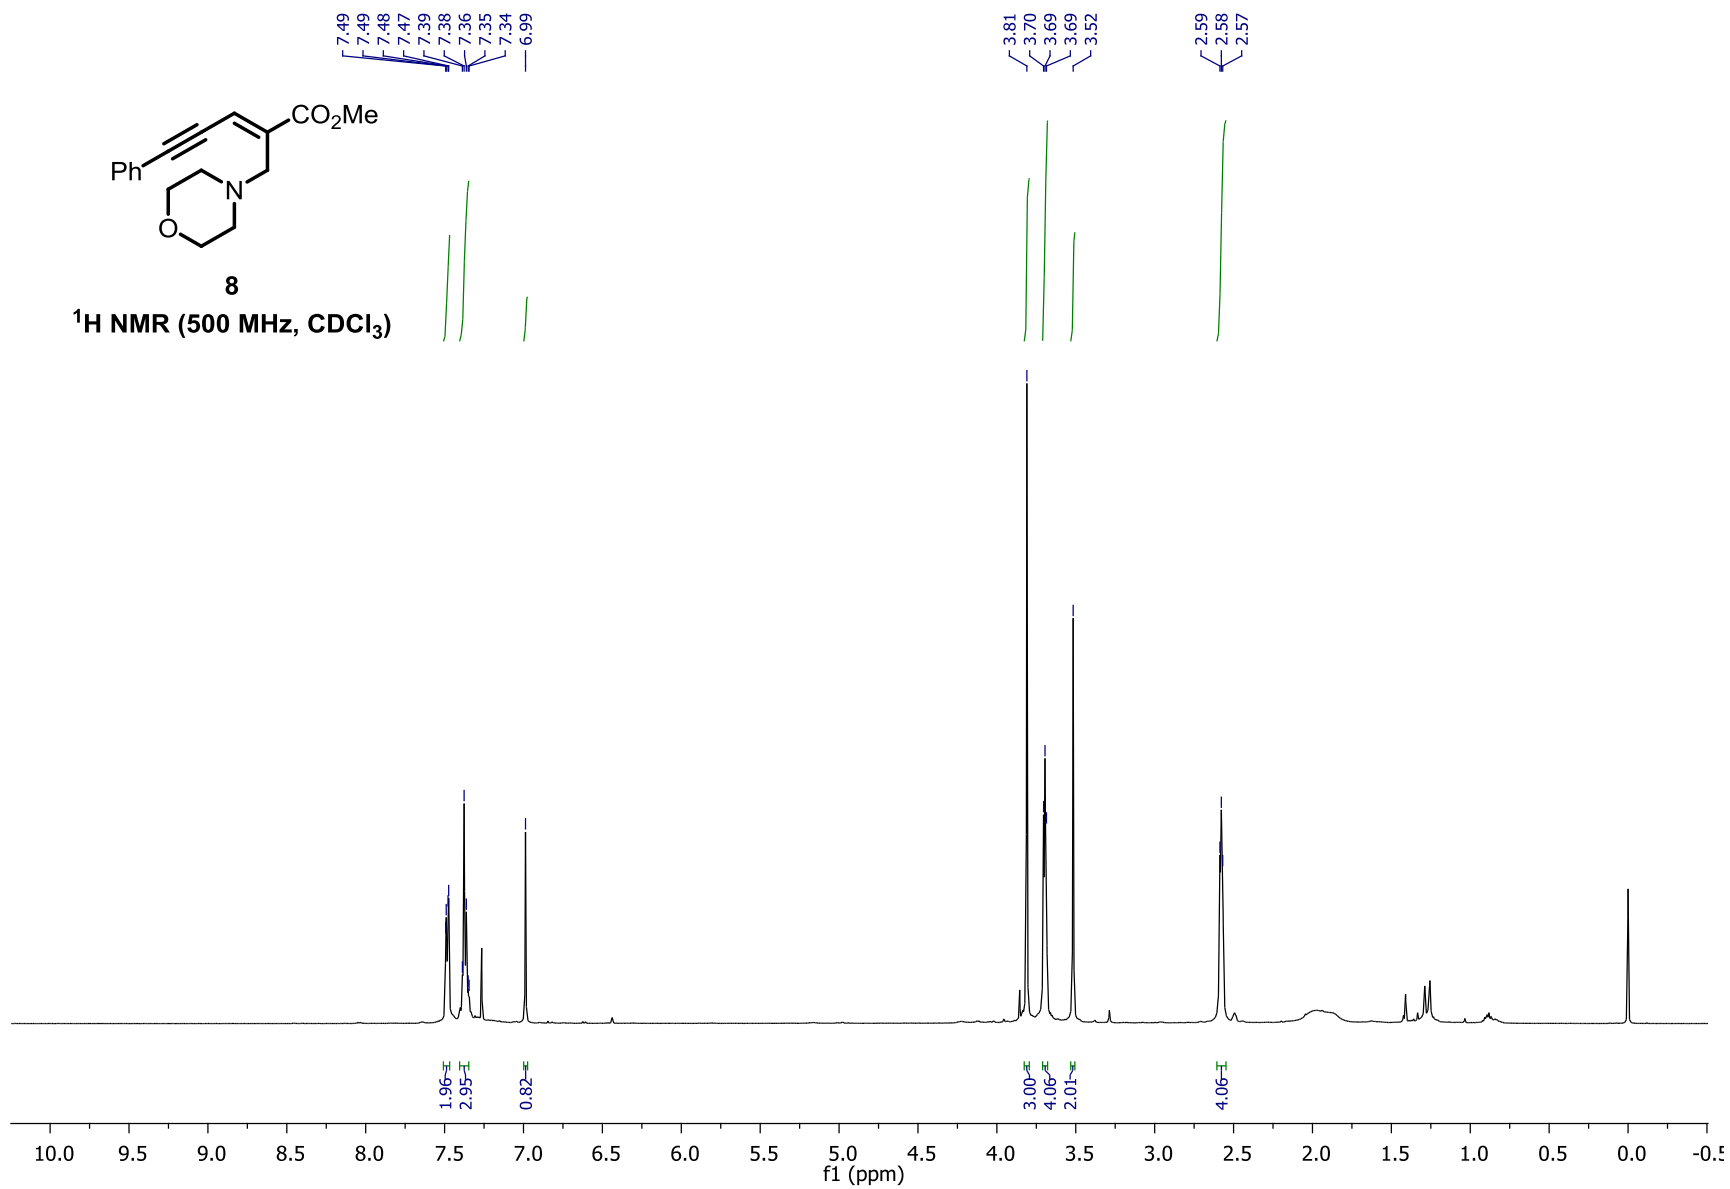

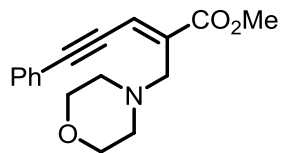

8

<sup>13</sup>C NMR (100 MHz, CDCl<sub>3</sub>)

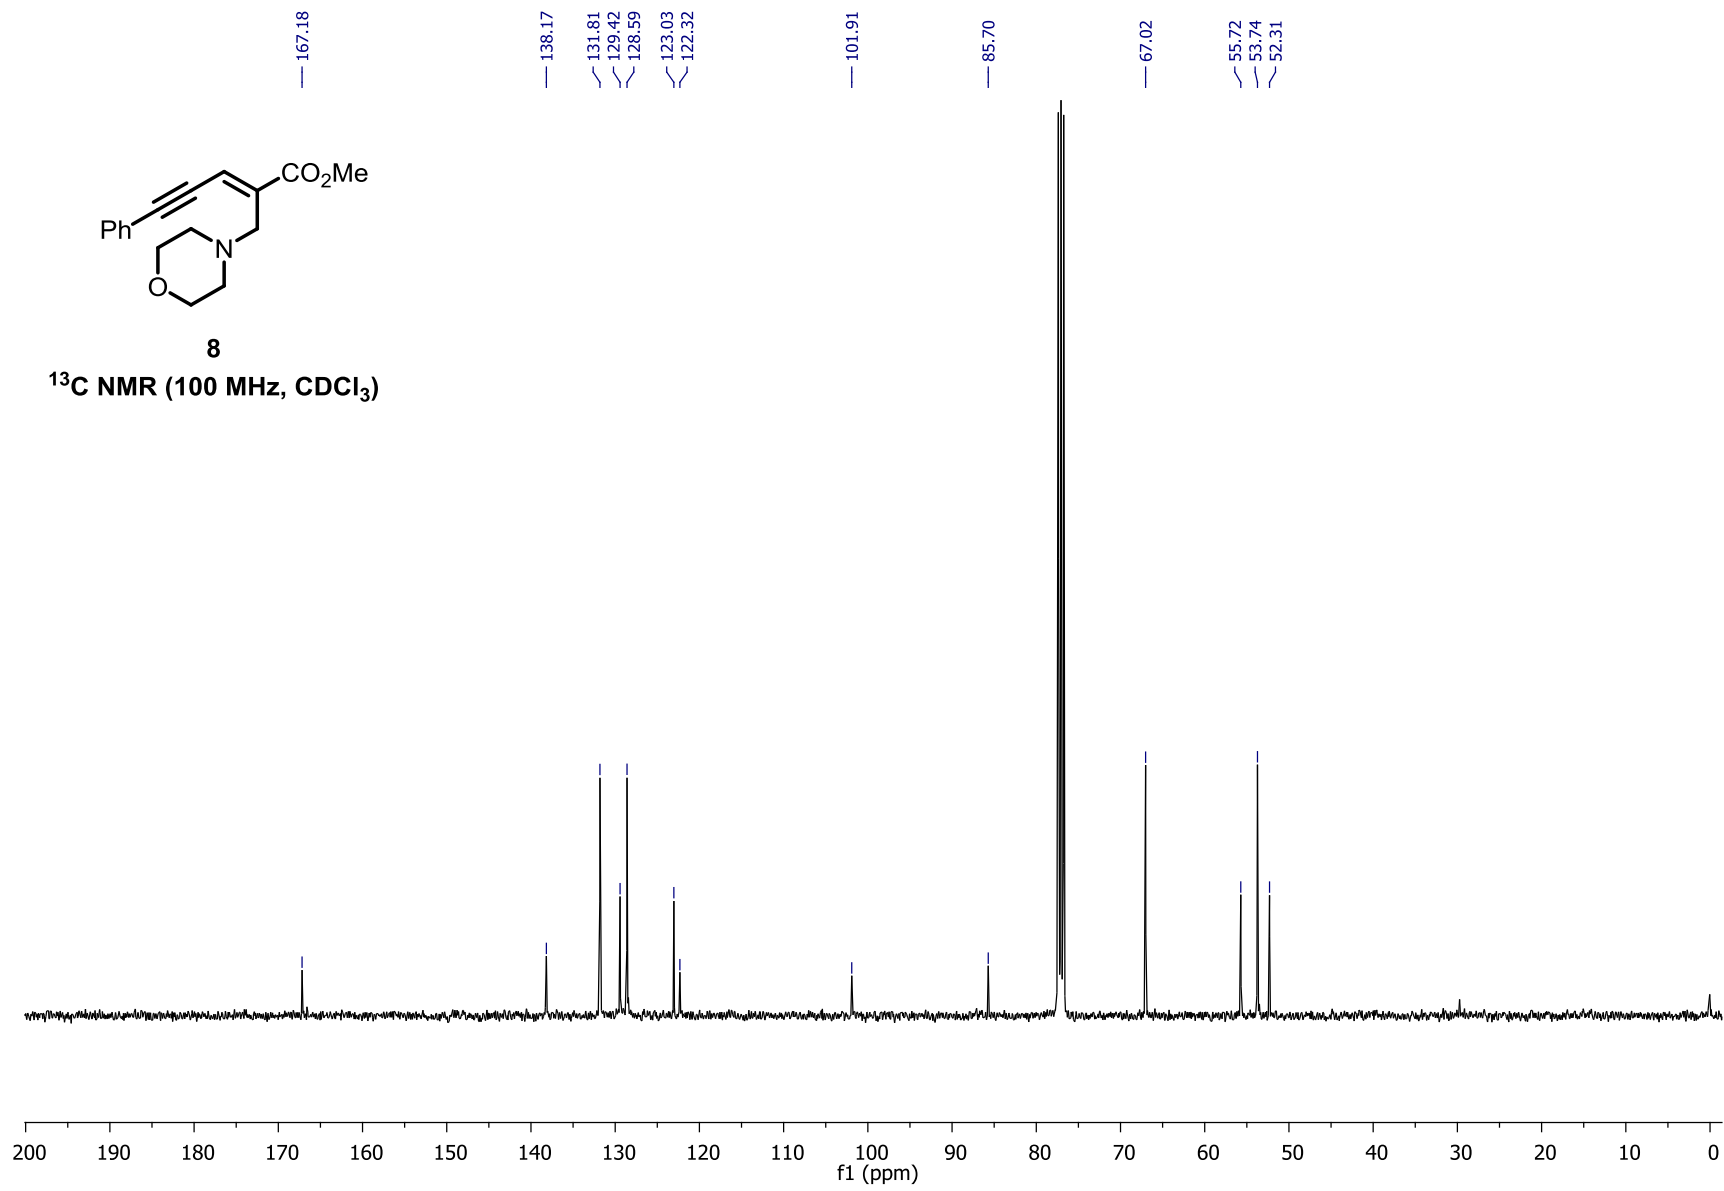

Supplement: d3cc02213g1.pdf [file d3cc02213g1.pdf]
